# Supplementary material for: Synthesis and optical properties of bis- and tris-alkynyl-2-trifluoromethylquinolines
Source: publisher site journal article supplement (doi:10.3762/bjoc.20.107), 2024-05-29
Supplement: Additional file 1 [file 1860-5397-20-107-S1.pdf]

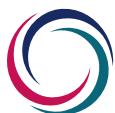

## Supporting Information

for

### Synthesis and optical properties of bis- and tris-alkynyl-2-trifluoromethylquinolines

Stefan Jopp, Franziska Spruner von Mertz, Peter Ehlers, Alexander Villinger  
and Peter Langer

*Beilstein J. Org. Chem.* **2024**, *20*, 1246–1255. doi:10.3762/bjoc.20.107

## Experimental part

## Table of contents

|                                                                                               |     |
|-----------------------------------------------------------------------------------------------|-----|
| 1. X-ray crystallography data.....                                                            | S2  |
| 2. DFT – Calculations .....                                                                   | S5  |
| Cartesian coordinates of the optimized ground-state (S0) structures.....                      | S5  |
| TD-DFT calculations.....                                                                      | S8  |
| 3. Experimental procedures and data.....                                                      | S10 |
| 4. NMR-Spectra ( <sup>1</sup> H-, <sup>13</sup> C-, dept, and <sup>19</sup> F-NMR) .....      | S22 |
| <b>3</b> - 8-Bromo-2-trifluoromethyl-4-quinolinone.....                                       | S22 |
| <b>4</b> - 4,8-Dibromo-2-trifluoromethylquinoline .....                                       | S24 |
| <b>7</b> - 6-Bromo-2-trifluoromethyl-4-quinolinone.....                                       | S26 |
| <b>8</b> - 4,6-Dibromo-2-trifluoromethylquinoline .....                                       | S29 |
| <b>10</b> – 3,8-Dibromo-2-trifluoromethyl-4-quinolinone .....                                 | S32 |
| <b>11</b> - 3,4,8-Tribromo-2-trifluoromethylquinoline .....                                   | S34 |
| <b>6a</b> - 4,8-Bis(phenylethynyl)-2-trifluoromethylquinoline .....                           | S36 |
| <b>6b</b> - 4,8-Bis(4'- <i>tert</i> -butylphenylethynyl)-2-trifluoromethylquinoline .....     | S39 |
| <b>6d</b> - 4,8-Bis(4'-fluorophenylethynyl)-2-trifluoromethylquinoline .....                  | S42 |
| <b>6e</b> - 4,8-Bis(4'-methoxyphenylethynyl)-2-trifluoromethylquinoline .....                 | S45 |
| <b>6f</b> - 4,8-Bis(3'-thienylethynyl)-2-trifluoromethylquinoline .....                       | S48 |
| <b>6g</b> - 4,8-Bis(cyclopropylethynyl)-2-trifluoromethylquinoline.....                       | S51 |
| <b>9a</b> - 4,6-Bis(phenylethynyl)-2-trifluoromethylquinoline .....                           | S53 |
| <b>9b</b> - 4,6-Bis(4'- <i>tert</i> -butylphenylethynyl)-2-trifluoromethylquinoline .....     | S55 |
| <b>9d</b> - 4,6-Bis(4'-fluorophenylethynyl)-2-trifluoromethylquinoline .....                  | S57 |
| <b>9e</b> - 4,6-Bis(4'-methoxyphenylethynyl)-2-trifluoromethylquinoline .....                 | S59 |
| <b>9f</b> - 4,6-Bis(3'-thienylethynyl)-2-trifluoromethylquinoline .....                       | S61 |
| <b>9g</b> – 4,6-Bis(cyclopropylethynyl)-2-trifluoromethylquinoline .....                      | S63 |
| <b>12a</b> - 3,4,8-Tris(phenylethynyl)-2-trifluoromethylquinoline .....                       | S66 |
| <b>12b</b> - 3,4,8-Tris(4'- <i>tert</i> -butylphenylethynyl)-2-trifluoromethylquinoline ..... | S68 |
| <b>12d</b> - 3,4,8-Tris(4'-fluorophenylethynyl)-2-trifluoromethylquinoline .....              | S70 |
| <b>12e</b> - 3,4,8-Tris(4'-methoxyphenylethynyl)-2-trifluoromethylquinoline .....             | S72 |
| <b>12f</b> - 3,4,8-Tris(3'-thienylethynyl)-2-trifluoromethylquinoline .....                   | S74 |
| <b>12g</b> - 3,4,8-Tris(cyclopropylethynyl)-2-trifluoromethylquinoline.....                   | S76 |

# 1. X-ray crystallography data

Table S1: X-ray data of **6b**

|                                   |                                                  |
|-----------------------------------|--------------------------------------------------|
| Chem. Formula                     | C <sub>34</sub> H <sub>30</sub> F <sub>3</sub> N |
| Form. Wght [g mol <sup>-1</sup> ] | 509.59                                           |
| color                             | colorless                                        |
| Crsyt. system                     | triclinic                                        |
| Space group (Hall group)          | P -1 (-P 1)                                      |
| <i>a</i> [Å]                      | 9.8285 (3)                                       |
| <i>b</i> [Å]                      | 11.0214 (4)                                      |
| <i>c</i> [Å]                      | 13.5473 (5)                                      |
| $\alpha$ [°]                      | 83.944 (2)                                       |
| $\beta$ [°]                       | 79.960 (2)                                       |
| $\gamma$ [°]                      | 80.206 (2)                                       |
| <i>V</i> [Å <sup>3</sup> ]        | 1419.61 (9)                                      |
| <i>Z</i>                          | 2                                                |
| <i>N</i> <sub>ref</sub>           | 6781                                             |
| $\theta_{\max}$ [°]               | 28.000                                           |
| <i>h, k, l</i> <sub>max</sub>     | 12,14,17                                         |
| $\rho_x$ [g cm <sup>-3</sup> ]    | 1.192                                            |
| $\mu$ [mm <sup>-1</sup> ]         | 0.082                                            |
| $\lambda_{MoK\alpha}$ [Å]         | 0.71073                                          |
| <i>T</i> [K]                      | 173                                              |
| <i>F</i> (000)                    | 536.0                                            |
| <i>N</i> <sub>par</sub>           | 396                                              |
| <i>R</i>                          | 0.0461 ( 5068)                                   |
| <i>wR</i> <sub>2</sub>            | 0.1329 ( 6781)                                   |
| <i>S</i>                          | 1.039                                            |

Table S2: X-ray data of **9f**

|                                   |                                                                |
|-----------------------------------|----------------------------------------------------------------|
| Chem. Formula                     | C <sub>22</sub> H <sub>10</sub> F <sub>3</sub> NS <sub>2</sub> |
| Form. Wght [g mol <sup>-1</sup> ] | 409.43                                                         |
| color                             | colorless                                                      |
| Crsyt. system                     | triclinic                                                      |
| Space group (Hall group)          | P -1 (-P 1)                                                    |
| <i>a</i> [Å]                      | 5.2778 (2)                                                     |
| <i>b</i> [Å]                      | 11.5411 (4)                                                    |
| <i>c</i> [Å]                      | 15.2732 (5)                                                    |
| $\alpha$ [°]                      | 76.491 (2)                                                     |
| $\beta$ [°]                       | 86.061 (2)                                                     |
| $\gamma$ [°]                      | 87.352 (2)                                                     |
| <i>V</i> [Å <sup>3</sup> ]        | 902.00 (6)                                                     |
| <i>Z</i>                          | 2                                                              |
| <i>N</i> <sub>ref</sub>           | 6485                                                           |
| $\theta_{\max}$ [°]               | 32.499                                                         |
| <i>h, k, l</i> <sub>max</sub>     | 7,17,23                                                        |
| $\rho_x$ [g cm <sup>-3</sup> ]    | 1.507                                                          |
| $\mu$ [mm <sup>-1</sup> ]         | 0.332                                                          |
| $\lambda_{MoK\alpha}$ [Å]         | 0.71073                                                        |
| <i>T</i> [K]                      | 173                                                            |
| <i>F</i> (000)                    | 416.0                                                          |
| <i>N</i> <sub>par</sub>           | 294                                                            |
| <i>R</i>                          | 0.0485 ( 4551)                                                 |
| <i>wR</i> <sub>2</sub>            | 0.1356 ( 6485)                                                 |
| <i>S</i>                          | 1.025                                                          |



Table S3: X-ray data of **12d**

|                                   |                                                  |
|-----------------------------------|--------------------------------------------------|
| Chem. Formula                     | C <sub>34</sub> H <sub>15</sub> F <sub>6</sub> N |
| Form. Wght [g mol <sup>-1</sup> ] | 551.47                                           |
| color                             | yellow                                           |
| Crsyt. system                     | monoclinic                                       |
| Space group (Hall group)          | C 2/c (-C 2yc)                                   |
| <i>a</i> [Å]                      | 31.408 (2)                                       |
| <i>b</i> [Å]                      | 7.1005 (4)                                       |
| <i>c</i> [Å]                      | 23.2841 (15)                                     |
| $\alpha$ [°]                      | 90                                               |
| $\beta$ [°]                       | 91.001 (4)                                       |
| $\gamma$ [°]                      | 90                                               |
| <i>V</i> [Å <sup>3</sup> ]        | 5191.9 (6)                                       |
| <i>Z</i>                          | 8                                                |
| <i>N</i> <sub>ref</sub>           | 6244                                             |
| $\theta_{\max}$ [°]               | 27.998                                           |
| <i>h, k, l</i> <sub>max</sub>     | 41,9,30                                          |
| $\rho_x$ [g cm <sup>-3</sup> ]    | 1.411                                            |
| $\mu$ [mm <sup>-1</sup> ]         | 0.112                                            |
| $\lambda_{MoK\alpha}$ [Å]         | 0.71073                                          |
| <i>T</i> [K]                      | 173                                              |
| <i>F</i> (000)                    | 2240.0                                           |
| <i>N</i> <sub>par</sub>           | 494                                              |
| <i>R</i>                          | 0.0503 ( 2846)                                   |
| <i>wR</i> <sub>2</sub>            | 0.1354 ( 6244)                                   |
| <i>S</i>                          | 0.994                                            |

## 2. DFT – Calculations

Density functional theory (DFT) and time-dependent DFT (TD-DFT) calculations were performed with Gaussian 09<sup>[67]</sup> using the B3LYP functional in combination with the 6-31+G(d,p) basis set and the CAM-B3LYP functional in combination with the 6-311G(d,p) basis set for TD-DFT calculations, respectively. To include solvent effects, a polarizable continuum model (PCM) of dichloromethane using the integral equation formalism variant (IEFPCM) was applied. The DFT calculations were performed for compounds **6a**, **9a** and **12a**.

Cartesian coordinates of the optimized ground-state (S0) structures

**Table 2.** Cartesian coordinates of **6a** (E = -1353.42 Hartree)

|   | X          | Y          | Z          |
|---|------------|------------|------------|
| C | -0.1246120 | 1.6852640  | -0.0099360 |
| C | -0.5263180 | -0.5718060 | 0.0001950  |
| C | 0.8731070  | -0.8735990 | -0.0013260 |
| C | 1.7905080  | 0.2318530  | -0.0077420 |
| C | 1.2710250  | 1.5221790  | -0.0133830 |
| C | -1.4772640 | -1.6548640 | 0.0047110  |
| C | 1.3002270  | -2.2237600 | 0.0029730  |
| H | 1.9280940  | 2.3815900  | -0.0204490 |
| C | 0.3737180  | -3.2441630 | 0.0084350  |
| C | -1.0074050 | -2.9643410 | 0.0091470  |
| H | 2.3632390  | -2.4381510 | 0.0016920  |
| H | 0.7050100  | -4.2775540 | 0.0118090  |
| H | -1.7223230 | -3.7800170 | 0.0127990  |
| N | -1.0013550 | 0.6991380  | -0.0024370 |
| C | -0.7356830 | 3.0739330  | 0.0087150  |
| F | -1.6415720 | 3.2299980  | -0.9770730 |
| F | 0.2003300  | 4.0368390  | -0.1431340 |
| F | -1.3724120 | 3.3138570  | 1.1757560  |
| C | 3.1947180  | 0.0234090  | -0.0087520 |
| C | 4.4012910  | -0.1392480 | -0.0077070 |
| C | -2.8721200 | -1.3839730 | 0.0035160  |
| C | -4.0720480 | -1.1811470 | 0.0008210  |
| C | 5.8144440  | -0.3167450 | -0.0058690 |
| C | 6.6712070  | 0.8033890  | -0.0160970 |
| C | 6.3733570  | -1.6112980 | 0.0068360  |
| C | 8.0518130  | 0.6270510  | -0.0135840 |
| H | 6.2430440  | 1.8001840  | -0.0258230 |
| C | 7.7554650  | -1.7757680 | 0.0093170  |
| H | 5.7165320  | -2.4748300 | 0.0148290  |
| C | 8.5972570  | -0.6599180 | -0.0008540 |
| H | 8.7041300  | 1.4947050  | -0.0214630 |
| H | 8.1773840  | -2.7759000 | 0.0192370  |
| H | 9.6747140  | -0.7927650 | 0.0011510  |
| C | -5.4707340 | -0.9093770 | -0.0029580 |
| C | -6.4104370 | -1.9605560 | 0.0063840  |

|          |            |            |            |
|----------|------------|------------|------------|
| <b>C</b> | -5.9336910 | 0.4229250  | -0.0164720 |
| <b>C</b> | -7.7746720 | -1.6817280 | 0.0024150  |
| <b>H</b> | -6.0589480 | -2.9871470 | 0.0166980  |
| <b>C</b> | -7.2998240 | 0.6906240  | -0.0203100 |
| <b>H</b> | -5.2122540 | 1.2333060  | -0.0240310 |
| <b>C</b> | -8.2238300 | -0.3582470 | -0.0108670 |
| <b>H</b> | -8.4896740 | -2.4988450 | 0.0096770  |
| <b>H</b> | -7.6451140 | 1.7199920  | -0.0307350 |
| <b>H</b> | -9.2884720 | -0.1453320 | -0.0139210 |

**Table 3.** Cartesian coordinates of **9a** (E = -1353.42 Hartree)

|   | <b>X</b>   | <b>Y</b>   | <b>Z</b>   |
|---|------------|------------|------------|
| C | -0.6675242 | -3.1986619 | -0.0055722 |
| C | 0.6838032  | -3.4277017 | -0.0062626 |
| C | 1.6060806  | -2.3446464 | -0.0069977 |
| C | 1.0988036  | -1.0046506 | -0.0076636 |
| C | -0.2966960 | -0.7913940 | -0.0069217 |
| C | -1.1830734 | -1.8633199 | -0.0056549 |
| H | -1.3661517 | -4.0283136 | -0.0047626 |
| H | 1.0863893  | -4.4348748 | -0.0060129 |
| C | 2.0550753  | 0.0681351  | -0.0087882 |
| H | -0.6761374 | 0.2240809  | -0.0072296 |
| C | 3.4074240  | -0.2589034 | -0.0099935 |
| C | 3.7779418  | -1.6152905 | -0.0085167 |
| H | 4.1612059  | 0.5170180  | -0.0119381 |
| N | 2.9346405  | -2.6317038 | -0.0064918 |
| C | 5.2427924  | -2.0090001 | 0.0062714  |
| F | 5.5461713  | -2.8261532 | -1.0230218 |
| F | 5.5631488  | -2.6656066 | 1.1422422  |
| F | 6.0544385  | -0.9319998 | -0.0785023 |
| C | 1.6416667  | 1.4253775  | -0.0082693 |
| C | -2.5895231 | -1.6476049 | -0.0039843 |
| C | -3.7946342 | -1.4755718 | -0.0019060 |
| C | 1.2990761  | 2.5937800  | -0.0062010 |
| C | 0.9108501  | 3.9638608  | -0.0031814 |
| C | 1.8891559  | 4.9796784  | -0.0013530 |
| C | -0.4533040 | 4.3209827  | -0.0015410 |
| C | 1.5068618  | 6.3179346  | 0.0020561  |
| H | 2.9391398  | 4.7064861  | -0.0025550 |
| C | -0.8240296 | 5.6625600  | 0.0018602  |
| H | -1.2076989 | 3.5412121  | -0.0028775 |
| C | 0.1522652  | 6.6629692  | 0.0036803  |
| H | 2.2662564  | 7.0936201  | 0.0034988  |
| H | -1.8763446 | 5.9291277  | 0.0031581  |
| H | -0.1416876 | 7.7080487  | 0.0064005  |
| C | -5.2045824 | -1.2678320 | 0.0009545  |
| C | -6.0896406 | -2.3656835 | -0.0007970 |
| C | -5.7343906 | 0.0390785  | 0.0058931  |
| C | -7.4660270 | -2.1563872 | 0.0023498  |

|   |            |            |            |
|---|------------|------------|------------|
| H | -5.6864100 | -3.3730016 | -0.0045752 |
| C | -7.1123758 | 0.2371715  | 0.0090507  |
| H | -5.0567975 | 0.8865534  | 0.0072899  |
| C | -7.9817225 | -0.8572796 | 0.0073046  |
| H | -8.1385048 | -3.0087705 | 0.0009780  |
| H | -7.5094737 | 1.2476492  | 0.0129151  |
| H | -9.0557353 | -0.6986783 | 0.0097902  |

Table 4. Cartesian coordinates of **12a** (E = -1660.64 Hartree)

|   | X          | Y          | Z          |
|---|------------|------------|------------|
| C | -0.8007080 | 0.7586130  | 0.0107180  |
| C | -1.7049170 | -1.3564860 | 0.0102840  |
| C | -0.4182290 | -1.9727500 | 0.0070870  |
| C | 0.7346460  | -1.1171430 | 0.0044450  |
| C | 0.5490800  | 0.2783450  | 0.0007190  |
| C | -2.8852190 | -2.1776860 | 0.0102940  |
| C | -0.3222250 | -3.3858320 | 0.0092560  |
| C | -1.4650560 | -4.1583010 | 0.0107510  |
| C | -2.7410040 | -3.5626720 | 0.0105050  |
| H | 0.6588330  | -3.8471650 | 0.0098390  |
| H | -1.3856160 | -5.2406010 | 0.0121250  |
| H | -3.6285860 | -4.1859070 | 0.0106780  |
| N | -1.8635160 | -0.0056190 | 0.0141140  |
| C | 2.0396730  | -1.6667640 | 0.0108070  |
| C | 1.6474840  | 1.1718870  | -0.0173890 |
| C | -4.1694070 | -1.5701400 | 0.0083720  |
| C | 2.5595660  | 1.9765880  | -0.0403220 |
| C | -5.2655820 | -1.0422230 | 0.0043040  |
| C | 3.1604500  | -2.1430250 | 0.0247310  |
| C | 3.5856950  | 2.9630180  | -0.0523480 |
| C | 3.2659640  | 4.3032920  | 0.2493970  |
| C | 4.9181150  | 2.6256470  | -0.3638800 |
| C | 4.2599260  | 5.2773650  | 0.2421710  |
| H | 2.2384980  | 4.5588280  | 0.4869550  |
| C | 5.9040650  | 3.6086650  | -0.3696070 |
| H | 5.1643610  | 1.5968570  | -0.6051230 |
| C | 5.5795850  | 4.9340430  | -0.0664140 |
| H | 4.0057020  | 6.3064370  | 0.4767090  |
| H | 6.9279820  | 3.3411240  | -0.6118070 |
| H | 6.3521070  | 5.6968260  | -0.0715950 |
| C | 4.4766970  | -2.6851740 | 0.0423060  |
| C | 4.6911650  | -4.0518360 | -0.2312690 |
| C | 5.5822900  | -1.8593180 | 0.3338750  |
| C | 5.9815550  | -4.5732920 | -0.2167290 |
| H | 3.8425470  | -4.6893490 | -0.4561300 |
| C | 6.8679960  | -2.3920720 | 0.3477940  |
| H | 5.4181700  | -0.8094820 | 0.5526170  |
| C | 7.0715790  | -3.7472750 | 0.0720010  |

|   |            |            |            |
|---|------------|------------|------------|
| H | 6.1379630  | -5.6260550 | -0.4302910 |
| H | 7.7132800  | -1.7497920 | 0.5744510  |
| H | 8.0762840  | -4.1583620 | 0.0828390  |
| C | -6.5179890 | -0.3634920 | -0.0019350 |
| C | -7.7337120 | -1.0765780 | -0.0018610 |
| C | -6.5487580 | 1.0469740  | -0.0092150 |
| C | -8.9466020 | -0.3925150 | -0.0090300 |
| H | -7.7138360 | -2.1615060 | 0.0036740  |
| C | -7.7667970 | 1.7206320  | -0.0164100 |
| H | -5.6116130 | 1.5942940  | -0.0092180 |
| C | -8.9678060 | 1.0049920  | -0.0163940 |
| H | -9.8779440 | -0.9506500 | -0.0089940 |
| H | -7.7802360 | 2.8062990  | -0.0221280 |
| H | -9.9158730 | 1.5340940  | -0.0221290 |
| C | -1.0681150 | 2.2588400  | 0.0016860  |
| F | -0.5668960 | 2.8363080  | -1.1143570 |
| F | -2.3787460 | 2.5400110  | 0.0463080  |
| F | -0.4874520 | 2.8700680  | 1.0609950  |

## TD-DFT calculations

Table 5. Calculated TD-DFT transitions of compound **6a** at CAM B3LYP/6-311+G(d,p) level

| S <sub>n</sub> | E (eV) | λ (nm) | f      | Configuration   | CI coefficient |
|----------------|--------|--------|--------|-----------------|----------------|
| S <sub>1</sub> | 3.3151 | 374.00 | 1.0553 | HOMO-1 → LUMO   | 0.10523        |
|                |        |        |        | HOMO → LUMO     | 0.67164        |
| S <sub>2</sub> | 3.9717 | 312.17 | 0.1679 | HOMO-9 → LUMO   | -0.10990       |
|                |        |        |        | HOMO-1 → LUMO   | 0.63800        |
|                |        |        |        | HOMO → LUMO+1   | -0.18925       |
| S <sub>3</sub> | 4.2702 | 279.09 | 0.6355 | HOMO-5 → LUMO   | 0.44274        |
|                |        |        |        | HOMO-4 → LUMO   | -0.25585       |
|                |        |        |        | HOMO-4 → LUMO+2 | 0.13505        |
|                |        |        |        | HOMO → LUMO+2   | 0.42129        |
| S <sub>4</sub> | 4.4425 | 279.09 | 0.6355 | HOMO-4 → LUMO   | -0.13509       |
|                |        |        |        | HOMO-1 → LUMO   | 0.13831        |
|                |        |        |        | HOMO-1 → LUMO+1 | -0.13611       |
|                |        |        |        | HOMO → LUMO+1   | 0.59405        |
|                |        |        |        | HOMO → LUMO+3   | 0.19617        |

Table 6. Calculated TD-DFT transitions of compound **9a** at CAM B3LYP/6-311+G(d,p) level

| <b>S<sub>n</sub></b> | <b>E (eV)</b> | <b>λ (nm)</b> | <b>f</b> | <b>Configuration</b> | <b>CI coefficient</b> |
|----------------------|---------------|---------------|----------|----------------------|-----------------------|
| S <sub>1</sub>       | 3.3806        | 366.76        | 0.7035   | HOMO-1 → LUMO+1      | 0.13067               |
|                      |               |               |          | HOMO-1 → LUMO+1      | -0.12660              |
|                      |               |               |          | HOMO → LUMO          | 0.66431               |
| S <sub>2</sub>       | 4.0123        | 309.01        | 0.5248   | HOMO-5 → LUMO        | 0.19465               |
|                      |               |               |          | HOMO-2 → LUMO        | -0.17599              |
|                      |               |               |          | HOMO-2 → LUMO+1      | -0.12319              |
|                      |               |               |          | HOMO-1 → LUMO        | 0.57571               |
|                      |               |               |          | HOMO → LUMO+2        | -0.16347              |
| S <sub>3</sub>       | 4.2337        | 292.85        | 0.9190   | HOMO-5 → LUMO        | 0.12480               |
|                      |               |               |          | HOMO-2 → LUMO        | -0.26859              |
|                      |               |               |          | HOMO-1 → LUMO        | -0.25375              |
|                      |               |               |          | HOMO → LUMO+1        | 0.53516               |
| S <sub>4</sub>       | 4.5081        | 275.02        | 0.3889   | HOMO-9 → LUMO        | 0.10789               |
|                      |               |               |          | HOMO-2 → LUMO        | 0.54600               |
|                      |               |               |          | HOMO-1 → LUMO        | 0.10004               |
|                      |               |               |          | HOMO-1 → LUMO+1      | -0.15181              |
|                      |               |               |          | HOMO → LUMO+1        | 0.32116               |
|                      |               |               |          | HOMO → LUMO+3        | -0.12706              |

Table 7. Calculated TD-DFT transitions of compound **12a** at CAM B3LYP/6-311+G(d,p) level

| <b>S<sub>n</sub></b> | <b>E (eV)</b> | <b>λ (nm)</b> | <b>f</b> | <b>Configuration</b> | <b>CI coefficient</b> |
|----------------------|---------------|---------------|----------|----------------------|-----------------------|
| S <sub>1</sub>       | 3.2201        | 385.03        | 0.6748   | HOMO-1 → LUMO+1      | 0.12117               |
|                      |               |               |          | HOMO → LUMO          | 0.66388               |
| S <sub>2</sub>       | 3.6442        | 340.22        | 0.6434   | HOMO-6 → LUMO        | -0.10103              |
|                      |               |               |          | HOMO-1 → LUMO        | 0.60294               |
|                      |               |               |          | HOMO → LUMO+1        | 0.27653               |
|                      |               |               |          | HOMO → LUMO+3        | 0.10481               |
| S <sub>3</sub>       | 3.8748        | 319.98        | 0.0127   | HOMO-8 → LUMO        | -0.11480              |
|                      |               |               |          | HOMO-7 → LUMO        | -0.15399              |
|                      |               |               |          | HOMO-6 → LUMO        | 0.10373               |
|                      |               |               |          | HOMO-2 → LUMO        | 0.35367               |
|                      |               |               |          | HOMO-1 → LUMO        | -0.15072              |
|                      |               |               |          | HOMO → LUMO+1        | 0.47310               |
|                      |               |               |          | HOMO → LUMO+2        | -0.13448              |
| S <sub>4</sub>       | 4.1239        | 300.65        | 1.4246   | HOMO-2 → LUMO        | 0.52883               |
|                      |               |               |          | HOMO-1 → LUMO        | 0.16087               |
|                      |               |               |          | HOMO-1 → LUMO+2      | -0.12470              |
|                      |               |               |          | HOMO → LUMO+1        | -0.31346              |

### 3. Experimental procedures and data

The nuclear magnetic resonance spectra ( $^1\text{H}/^{13}\text{C}/^{19}\text{F}$  NMR) were recorded on a Bruker AVANCE 300 III, 250 II, or 500. The analyzed chemical shifts  $\delta$  are referenced to residual solvents signals of the deuterated solvents  $\text{CDCl}_3$  ( $\delta = 7.26$  ppm/77.0 ppm). Multiplicities due to spin–spin correlation are reported as follows, s = singlet, d = doublet, dd = double doublet, ddd = doublets of doublets, pt = pseudo triplet, m = multiplet, and further described through their coupling constants  $J$ . Infrared spectra (IR) were measured as attenuated total reflection (ATR) experiments with a Nicolet 380 FT-IR spectrometer. The signals have been characterized through their wave numbers  $\tilde{\nu}$  and their corresponding absorption as very strong (vs), strong (s), medium (m) or weak (w). UV–vis spectra were recorded on a Cary 60 UV–vis spectrophotometer and emission spectra with an Agilent Cary Eclipse fluorescence spectrophotometer. Basic and high-resolution mass spectra (MS/HRMS) were measured on instruments which are paired with a preceding gas chromatograph (GC) or liquid chromatograph (LC). The samples have been ionized through electron impact ionization (EI) on an Agilent 6890/5973 or Agilent 7890/5977 GC–MS equipped with a HP-5 capillary column using helium carrier gas or by applying electron spray ionization (ESI) on an Agilent 1200/6210 Time-of-Flight (TOF) LC–MS. Melting points (mp) were determined by a Micro-Hot-Stage Galen<sup>TM</sup> III Cambridge Instruments and are not corrected. X-ray single-crystal structure analysis was performed on a Bruker Apex Kappa-II CCD diffractometer. CCDCs 2322983–2322985 contain supplementary crystallographic data for this paper. These data can be obtained free of charge from The Cambridge Crystallographic Data Centre via [www.ccdc.cam.ac.uk/data\\_request/cif](http://www.ccdc.cam.ac.uk/data_request/cif).

#### Synthesis of 8-bromo-2-trifluoromethyl-4-quinolinone (**3**)<sup>i</sup>

Polyphosphoric acid (0.8 g/mmol, 46.40 g) and ethyl 4,4,4-trifluoroacetoacetate (**2**, 58 mmol, 8.48 mL) were heated to 100 °C in a 500 mL flask. 2-Bromoaniline (**1a**, 58 mmol, 9.98 g) was added quickly and the reaction was stirred for 2 h at 150 °C. After cooling down, a 10% NaOH solution was added until a white precipitate is formed. Additional, 10% NaOH solution was added until the precipitate is dissolved again. Overall 360 mL 10% NaOH solution was used. The solution was filtered and the filtrate was made acidic via 36% HCl. The white precipitate was collected and dried to yield **3** as white solid (12.22 g, 72%). mp. 127–128 °C.  $^1\text{H}$  NMR (300 MHz, DMSO-*d*<sub>6</sub>):  $\delta$  = 7.39 (s, 1H,); 7.54 (pt,  $^3J = 7.90$  Hz, 1H); 8.18–8.24 (m, 2H).  $^{13}\text{C}$  NMR (75 MHz, DMSO-*d*<sub>6</sub>):  $\delta$  = 100.9 (q,  $^3J = 2.0$  Hz, CH); 121.3 (q,  $^1J = 275.6$  Hz, CF<sub>3</sub>); 122.3 (CH); 122.8, 124.0 (C); 128.0, 134.9 (CH); 145.1 (C); 148.0 (q,  $^2J = 33.5$  Hz, C–CF<sub>3</sub>); 163.9 (C=O).  $^{19}\text{F}$  NMR (282 MHz, DMSO-*d*<sub>6</sub>):  $\delta$  = -66.58. MS (EI, 70 eV):  $m/z$  (%) = 294 (11), 293 ( $\text{M}^+$ ,  $^{81}\text{Br}$ , 98), 292 (13), 291 ( $\text{M}^+$ ,  $^{79}\text{Br}$ , 100), 265 (18), 263 (19), 245 (49), 243 (48), 183 (10), 164 (14), 144 (16), 88 (10), 75 (16), 63 (10). HRMS (EI, 70 eV): Calculated for  $\text{C}_{10}\text{H}_5^{79}\text{BrF}_3\text{ON}$  ( $\text{M}^+$ ), 290.95011; measured 290.94938. Calculated for  $\text{C}_{10}\text{H}_5^{81}\text{BrF}_3\text{ON}$  ( $\text{M}^+$ ), 292.94807; measured 292.94752.

### Synthesis of 4,8-dibromo-2-trifluoromethylquinoline (**4**)<sup>i</sup>

Phosphorus oxybromide (4.4 mmol, 1.26 g) was heated to 75 °C under reflux. **3** (4.0 mmol, 1.17 g) was added quickly and the reaction was stirred for 2 h at 150 °C. After cooling down, 10 mL ice-water were added carefully and the solution was made alkaline with a 10% NaOH solution. The aqueous solution was decanted and the remaining solid was collected and dried to yield **4** as yellow solid (1.05 g, 74%). mp. 85–86 °C. <sup>1</sup>H NMR (300 MHz, DMSO-*d*<sub>6</sub>): δ = 7.81 (pt, <sup>3</sup>*J* = 8.00 Hz, 1H); 8.27 (dd, <sup>3</sup>*J* = 8.50 Hz, <sup>4</sup>*J* = 1.10 Hz, 1H); 8.39 (dd, <sup>3</sup>*J* = 7.60 Hz, <sup>4</sup>*J* = 1.10 Hz, 1H); 8.51 (s, 1H). <sup>13</sup>C NMR (75 MHz, DMSO-*d*<sub>6</sub>): δ = 120.5 (q, <sup>1</sup>*J* = 275.6 Hz, CF<sub>3</sub>); 122.2 (q, <sup>3</sup>*J* = 2.20 Hz, CH); 124.9 (C); 127.8 (CH); 129.5 (C); 131.3, 135.9 (CH); 136.5 (C); 143.7 (C); 146.9 (q, <sup>2</sup>*J* = 35.0 Hz, C-CF<sub>3</sub>). <sup>19</sup>F NMR (282 MHz, DMSO-*d*<sub>6</sub>): δ = -65.99. MS (EI, 70 eV): *m/z* (%) = 357 (M<sup>+</sup>, 2x <sup>81</sup>Br, 50), 356 (11), 355 (M<sup>+</sup>, 1x <sup>79</sup>Br, 1x <sup>81</sup>Br, 50), 353 (M<sup>+</sup>, 2x <sup>79</sup>Br, 51), 286 (18), 207 (11), 205 (12), 100 (14), 99 (15), 74 (11). HRMS (EI, 70 eV): Calculated for C<sub>10</sub>H<sub>4</sub><sup>79</sup>Br<sub>2</sub>F<sub>3</sub>N (M<sup>+</sup>), 352.86571; measured 352.86542. Calculated for C<sub>10</sub>H<sub>4</sub><sup>79</sup>Br<sup>81</sup>BrF<sub>3</sub>N (M<sup>+</sup>), 354.86366; measured 354.86345. Calculated for C<sub>10</sub>H<sub>4</sub><sup>81</sup>Br<sub>2</sub>F<sub>3</sub>N (M<sup>+</sup>), 356.86162; measured 356.89097.

### Synthesis of 6-bromo-2-trifluoromethyl-4-quinolinone (**7**)<sup>ii</sup>

**7** was synthesized analogously to **3**. Polyphosphoric acid (0.8 g/mmol, 12.00 g), ethyl 4,4,4-trifluoroacetoacetate (**2**, 15 mmol, 2.19 mL) and 4-bromoaniline (**1b**, 15 mmol, 2.63 g) were used to yield **7** as white solid (1.63 g, 37%). The <sup>13</sup>C-NMR was not analyzable, due to low solubility. mp. 243–244 °C. <sup>1</sup>H NMR (300 MHz, DMSO-*d*<sub>6</sub>): δ = 7.16 (s, 1H); 7.92 (s, 2H); 8.29 (s, 1H). <sup>19</sup>F NMR (282 MHz, DMSO-*d*<sub>6</sub>): δ = -66.48. IR (ATR, cm<sup>-1</sup>):  $\tilde{\nu}$  = 3072 (w), 2881 (m), 2792 (m), 1608 (m), 1555 (s), 1508 (s), 1467 (s), 1419 (m), 1354 (m), 1297 (s), 1278 (s), 1193 (s), 1148 (s), 1134 (s), 1108 (s), 1090 (s), 942 (m), 854 (s), 827 (s), 723 (s), 555 (s), 538 (s). MS (EI, 70 eV): *m/z* (%) = 294 (11), 293 (M<sup>+</sup>, <sup>81</sup>Br, 94), 292 (14), 291 (M<sup>+</sup>, <sup>79</sup>Br, 100), 245 (13), 243 (14), 224 (18), 222 (19), 184 (20), 183 (11), 164 (10), 134 (10), 115 (11), 114 (10), 88 (13), 75 (14), 74 (11), 69 (13), 63 (13), 62 (11). HRMS (EI, 70 eV): Calculated for C<sub>10</sub>H<sub>5</sub><sup>79</sup>BrF<sub>3</sub>ON (M<sup>+</sup>), 290.95011; measured 290.95070. Calculated for C<sub>10</sub>H<sub>5</sub><sup>81</sup>BrF<sub>3</sub>ON (M<sup>+</sup>), 292.94807; measured 292.94898.

### Synthesis of 4,6-dibromo-2-trifluoromethylquinoline (**8**)<sup>iii</sup>

**8** was synthesized analogously to **4**. Phosphorus oxybromide (4.4 mmol, 1.26 g) and **7** (4.0 mmol, 1.17 g) were used to yield **8** as gray solid (1.24 g, 87%). mp. 120–121 °C. <sup>1</sup>H NMR (300 MHz, CDCl<sub>3</sub>): δ = 7.93 (dd, <sup>3</sup>*J* = 8.87 Hz, <sup>4</sup>*J* = 2.08 Hz, 1H); 8.04 (s, 1H); 8.08 (d, <sup>3</sup>*J* = 8.87 Hz, 1H); 8.43 (d, <sup>4</sup>*J* = 2.08 Hz, 1H). <sup>13</sup>C NMR (75 MHz, CDCl<sub>3</sub>): δ = 120.7 (q, <sup>1</sup>*J* = 275.6 Hz, CF<sub>3</sub>); 121.8 (q, <sup>3</sup>*J* = 2.20 Hz, CH); 124.7 (C); 129.1 (CH); 129.6 (C); 132.2 (CH); 134.5 (C); 135.4 (CH); 146.2 (C); 147.9 (q, <sup>2</sup>*J* = 35.6 Hz, C-CF<sub>3</sub>). <sup>19</sup>F NMR (282 MHz, CDCl<sub>3</sub>): δ = -67.58. IR (ATR, cm<sup>-1</sup>):  $\tilde{\nu}$  = 3084 (w), 3059 (w), 1743 (w), 1602 (w), 1579 (w), 1547 (m), 1478 (m), 1449 (m), 1335 (m), 1194 (m), 1141 (s), 1094 (m), 1064 (m), 873 (m), 836 (m), 766 (m), 681 (s),



640 (m), 608 (m). MS (EI, 70 eV):  $m/z$  (%) = 357 ( $M^+$ ,  $2 \times {}^{81}\text{Br}$ , 50), 356 (11), 355 ( $M^+$ ,  $1 \times {}^{79}\text{Br}$ ,  $1 \times {}^{81}\text{Br}$ , 50), 353 ( $M^+$ ,  $2 \times {}^{79}\text{Br}$ , 51), 286 (15), 276 (10), 274 (10), 207 (11), 205 (11), 100 (20), 99 (20), 74 (16), 69 (11). HRMS (EI, 70 eV): Calculated for  $\text{C}_{10}\text{H}_4{}^{79}\text{Br}_2\text{F}_3\text{N}$  ( $M^+$ ), 352.86571; measured 352.86648. Calculated for  $\text{C}_{10}\text{H}_4{}^{79}\text{Br}^{81}\text{BrF}_3\text{N}$  ( $M^+$ ), 354.86366; measured 354.86461.

### Synthesis of 3,8-dibromo-2-trifluoromethyl-4-quinolinone (10)

**3** (35.0 mmol, 10.22 g) was dissolved in glacial acetic acid (2.5 mL/mmol, 87.5 mL) and bromine (38.5 mmol, 6.15 g) was added slowly. The reaction was heated under reflux for 24 h. After cooling down an orange precipitate was formed. The precipitate was filtered, washed with water, collected and dried to yield **10** as white solid (9.61 g, 74%). The product exists in  $\text{CDCl}_3$  as a mixture of keto- and enol-tautomers in a ratio of 84:16. mp. 162–163 °C.  $^1\text{H}$  NMR (250 MHz,  $\text{CDCl}_3$ ):  $\delta$  = 7.35 (pt,  $^3J$  = 7.96 Hz, 1H); 7.49 (pt,  $^3J$  = 7.96 Hz, enol); 7.94 (dd,  $^3J$  = 7.72 Hz,  $^4J$  = 1.26 Hz, 1H); 8.12 (dd,  $^3J$  = 7.72 Hz,  $^4J$  = 1.26 Hz, enol); 8.23 (dd,  $^3J$  = 8.35 Hz,  $^4J$  = 1.26 Hz, enol); 8.35 (dd,  $^3J$  = 8.35 Hz,  $^4J$  = 1.26 Hz, 1H); 9.02 (s, 1H, NH, enol).  $^{13}\text{C}$  NMR (63 MHz,  $\text{CDCl}_3$ ):  $\delta$  = 107.6, 111.8 (C); 119.7 (q,  $^1J$  = 276.9 Hz,  $\text{CF}_3$ ); 121.9 (C); 124.5 (CH, enol); 126.2, 126.8 (CH); 128.9 (CH, enol); 134.8 (C); 135.1 (CH, enol); 135.7 (q,  $^2J$  = 34.2 Hz, C- $\text{CF}_3$ ); 136.3 (CH); 172.8 (C=O).  $^{19}\text{F}$  NMR (282 MHz,  $\text{CDCl}_3$ ):  $\delta$  = -66.23 (enol); -66.11 (keto). IR (ATR,  $\text{cm}^{-1}$ ):  $\tilde{\nu}$  = 3343 (m), 2068 (w), 1941 (w), 1887 (w), 1834 (w), 1731 (w), 1644 (w), 1595 (m), 1558 (m), 1525 (m), 1442 (m), 1392 (m), 1364 (m), 1310 (m), 1248 (m), 1186 (s), 1165 (s), 1135 (s), 1102 (s), 955 (m), 935 (s), 809 (m), 755 (s), 742 (s), 630 (m), 601 (s), 526 (m). MS (EI, 70 eV):  $m/z$  (%) = 373 ( $M^+$ ,  $2 \times {}^{81}\text{Br}$ , 48), 372 (14), 371 ( $M^+$ ,  $1 \times {}^{79}\text{Br}$ ,  $1 \times {}^{81}\text{Br}$ , 100), 369 ( $M^+$ ,  $2 \times {}^{79}\text{Br}$ , 52), 323 (20), 321 (10), 183 (12), 163 (23). HRMS (EI, 70 eV): Calculated for  $\text{C}_{10}\text{H}_4{}^{79}\text{Br}_2\text{F}_3\text{ON}$  ( $M^+$ ), 369.86845; measured 369.86856. Calculated for  $\text{C}_{10}\text{H}_4{}^{79}\text{Br}^{81}\text{BrF}_3\text{ON}$  ( $M^+$ ), 371.86644; measured 371.86682. Calculated for  $\text{C}_{10}\text{H}_4{}^{81}\text{Br}_2\text{F}_3\text{ON}$  ( $M^+$ ), 373.86448; measured 373.86464.

### Synthesis of 3,4,8-tribromo-2-trifluoromethylquinoline (11) [34]

**11** was synthesized analogously to **4**. Phosphorus oxybromide (4.4 mmol, 1.26 g) and **10** (4.0 mmol, 1.48 g) were used to yield **11** as white solid (1.56 g, 90%). mp. 132–133 °C.  $^1\text{H}$  NMR (300 MHz,  $\text{CDCl}_3$ ):  $\delta$  = 7.60 (pt,  $^3J$  = 8.13 Hz, 1H); 8.17 (dd,  $^3J$  = 7.53 Hz,  $^4J$  = 0.93 Hz, 1H); 8.27 (dd,  $^3J$  = 8.52 Hz,  $^4J$  = 0.92 Hz, 1H).  $^{13}\text{C}$  NMR (75 MHz,  $\text{CDCl}_3$ ):  $\delta$  = 118.2 (C); 120.3 (q,  $^1J$  = 276.7 Hz,  $\text{CF}_3$ ); 126.4 (C); 127.6 (CH); 130.9 (C); 131.2, 135.1 (CH); 140.1 (C); 141.8 (q,  $^3J$  = 1.10 Hz, C-3); 145.8 (q,  $^2J$  = 35.0 Hz, C- $\text{CF}_3$ ).  $^{19}\text{F}$  NMR (282 MHz,  $\text{CDCl}_3$ ):  $\delta$  = -66.15. IR (ATR,  $\text{cm}^{-1}$ ):  $\tilde{\nu}$  = 3107 (w), 1972 (w), 1894 (w), 1814 (w), 1714 (w), 1598 (w), 1442 (m), 1379 (m), 1350 (m), 1305 (m), 1290 (m), 1258 (m), 1190 (s), 1129 (s), 1003 (m), 892 (m), 804 (m), 760 (s), 712 (s), 623 (m). MS (EI, 70 eV):  $m/z$  (%) = 437 ( $M^+$ ,  $3 \times {}^{81}\text{Br}$ , 34), 436 (10), 435 ( $M^+$ ,  $1 \times {}^{79}\text{Br}$ ,  $2 \times {}^{81}\text{Br}$ , 94), 434 (11), 433 ( $M^+$ ,  $2 \times {}^{79}\text{Br}$ ,  $1 \times {}^{81}\text{Br}$ , 100), 431 ( $M^+$ ,  $3 \times {}^{79}\text{Br}$ , 35), 364 (10), 354 (13), 285 (21), 283 (11), 194 (18), 99 (15), 69 (15). HRMS (EI, 70 eV): Calculated for  $\text{C}_{10}\text{H}_3{}^{79}\text{Br}_3\text{F}_3\text{N}$  ( $M^+$ ),

430.77622; measured 430.77700. Calculated for  $C_{10}H_3^{79}Br_2^{81}BrF_3N$  ( $M^+$ ), 432.77418; measured 432.77443. Calculated for  $C_{10}H_3^{79}Br^{81}Br_2F_3N$  ( $M^+$ ), 434.77213; measured 434.77200. Calculated for  $C_{10}H_3^{81}Br_3F_3N$  ( $M^+$ ), 436.77008; measured 436.77002.

#### General procedure A for the twofold Sonogashira reaction

**4** or **8** (0.5 mmol, 177 mg),  $Pd(PPh_3)_4$  (0.0125 mmol, 2.5 mol %, 14.4 mg), copper iodide (0.025 mmol, 5 mol %, 4.8 mg) and corresponding acetylene **5** (1.5 mmol) were dissolved in dioxane (2 mL) and  $NEt_3$  (1 mL). The reaction mixture was stirred at 100 °C for 6 h. After cooling to room temperature, the solution was diluted with water and extracted with ethyl acetate (3×). The crude product **6** or **9** was purified by column chromatography.

#### General procedure B for the threefold Sonogashira reaction

**11** (0.5 mmol, 217 mg),  $Pd(PPh_3)_4$  (0.0125 mmol, 2.5 mol %, 14.4 mg), copper iodide (0.025 mmol, 5 mol %, 4.8 mg) and corresponding acetylene **5** (2.0 mmol) were dissolved in dioxane (2 mL) and  $NEt_3$  (1 mL). The reaction mixture was stirred at 100 °C for 24 h. After cooling to room temperature, the solution was diluted with water and extracted with ethyl acetate (3×). The crude product **12** was purified by column chromatography.

#### 4,8-Bis(phenylethynyl)-2-trifluoromethylquinoline (**6a**)

**6a** was synthesized according to general procedure A using **4** and phenylacetylene (**5a**, 1.5 mmol, 165  $\mu$ L) and was purified via column chromatography (heptane/dichloromethane 10:1). Yield: 197 mg (99%). mp. 146–147 °C.  $^1H$  NMR (300 MHz,  $CDCl_3$ ):  $\delta$  = 7.38–7.48 (m, 6H); 7.67–7.74 (m, 5H); 7.94 (s, 1H); 8.08 (dd,  $^3J$  = 7.30 Hz,  $^4J$  = 1.35 Hz, 1H); 8.39 (dd,  $^3J$  = 8.40 Hz,  $^4J$  = 1.35 Hz, 1H).  $^{13}C$  NMR (75 MHz,  $CDCl_3$ ):  $\delta$  = 84.4, 86.3, 97.2, 100.7 (C $\equiv$ C); 119.9 (q,  $^3J$  = 2.20 Hz, CH); 121.4 (q,  $^1J$  = 275.0 Hz,  $CF_3$ ); 121.6, 123.3, 124.9 (C); 126.0, 128.4 (CH); 128.5 (C); 128.5, 128.6, 128.7, 129.9, 132.0, 132.1 (CH); 132.4 (C); 134.7 (CH); 147.1 (C); 147.8 (q,  $^2J$  = 35.2 Hz, C- $CF_3$ ).  $^{19}F$  NMR (282 MHz,  $CDCl_3$ ):  $\delta$  = -67.56. IR (ATR,  $cm^{-1}$ ):  $\tilde{\nu}$  = 3051 (w), 2923 (w), 2852 (w), 2197 (m), 1958 (w), 1888 (w), 1818 (w), 1740 (w), 1583 (m), 1503 (m), 1461 (m), 1389 (m), 1278 (m), 1171 (m), 1115 (s), 929 (m), 879 (m), 750 (m), 682 (s), 535 (m). MS (EI, 70 eV):  $m/z$  (%) = 398 (26), 397 ( $M^+$ , 100), 329 (14), 328 (50), 327 (10), 326 (15). HRMS (EI, 70 eV): Calculated for  $C_{26}H_{14}F_3N$  ( $M^+$ ), 397.10729; measured 397.10817.

#### 4,8-Bis(4'-tert-butylphenylethynyl)-2-trifluoromethylquinoline (**6b**)

**6b** was synthesized according to general procedure A using **4** and 4-*tert*-butylphenylacetylene (**5b**, 1.5 mmol, 270  $\mu$ L) and was purified via column chromatography (heptane/dichloromethane 10:1). Yield: 234 mg (92%). mp. 159–160 °C.  $^1H$  NMR (500 MHz,  $CDCl_3$ ):  $\delta$  = 1.36 (s, 9H, *t*-Bu); 1.37 (s, 9H, *t*Bu); 7.43 (d,  $^3J$  = 8.51 Hz, 2H); 7.47 (d,  $^3J$  = 8.51 Hz, 2H); 7.62 (d,  $^3J$  = 8.51 Hz, 2H); 7.64 (d,  $^3J$  = 8.51 Hz, 2H);

7.70 (pt,  $^3J = 7.70$  Hz, 1H); 7.92 (s, 1H); 8.06 (dd,  $^3J = 7.25$  Hz,  $^4J = 1.26$  Hz, 1H); 8.38 (dd,  $^3J = 8.19$  Hz,  $^4J = 1.26$  Hz, 1H).  $^{13}\text{C}$  NMR (125 MHz,  $\text{CDCl}_3$ ):  $\delta = 31.1, 31.2$  ( $\text{CH}_3$ ); 34.9, 35.0 ( $\text{C}(\text{Me})_3$ ); 84.0, 85.8, 97.4, 101.1 ( $\text{C}\equiv\text{C}$ ); 118.6 (C); 119.8 (q,  $^3J = 1.80$  Hz, CH); 120.3 (C); 121.5 (q,  $^1J = 275.5$  Hz,  $\text{CF}_3$ ); 125.2 (C); 125.4, 125.7, 125.9, 128.5 (CH); 128.6 (C); 131.7, 131.9 (CH); 132.6 (C); 134.5 (CH); 147.1 (C); 147.8 (q,  $^2J = 35.1$  Hz, C- $\text{CF}_3$ ); 151.9, 153.5 (C).  $^{19}\text{F}$  NMR (282 MHz,  $\text{CDCl}_3$ ):  $\delta = -67.52$ . IR (ATR,  $\text{cm}^{-1}$ ):  $\tilde{\nu} = 3068$  (w), 2960 (m), 2867 (w), 2203 (m), 1587 (m), 1507 (m), 1462 (m), 1408 (m), 1362 (m), 1279 (m), 1185 (m), 1123 (s), 1105 (s), 1017 (m), 933 (m), 882 (m), 832 (s), 763 (s), 737 (m), 627 (m), 560 (s). MS (EI, 70 eV):  $m/z$  (%) = 510 (24), 509 ( $\text{M}^+$ , 66), 495 (35), 494 (100), 478 (20), 464 (14), 240 (15), 211 (10). HRMS (ESI): Calculated for  $\text{C}_{34}\text{H}_{30}\text{F}_3\text{N}$  ( $[\text{M}+\text{H}]^+$ ), 510.24031; measured 510.24024.

#### 4,8-Bis(4'-cyanophenylethynyl)-2-trifluoromethylquinoline (6c)

**6c** was synthesized according to general procedure A using **4** and 4-cyanophenylacetylene (**5c**, 1.5 mmol, 191 mg). During aqueous work-up the product precipitates. The solid was filtered and washed with dichloromethane. Product **6c** was insoluble even at high temperatures, thus making an NMR impossible. Yield: 158 mg (71%). mp. 292–293 °C. IR (ATR,  $\text{cm}^{-1}$ ):  $\tilde{\nu} = 2974$  (w), 2936 (w), 2674 (w), 2490 (w), 2222 (m), 1603 (m), 1505 (m), 1463 (m), 1409 (m), 1393 (m), 1285 (m), 1182 (m), 1113 (s), 932 (m), 886 (m), 839 (s), 766 (s), 744 (m), 640 (m), 552 (s). MS (EI, 70 eV):  $m/z$  (%) = 448 (32), 447 ( $\text{M}^+$ , 100), 379 (15), 378 (52), 376 (11). HRMS (EI, 70 eV): Calculated for  $\text{C}_{28}\text{H}_{12}\text{F}_3\text{N}_3$  ( $\text{M}^+$ ), 447.09778; measured 447.09818.

#### 4,8-Bis(4'-fluorophenylethynyl)-2-trifluoromethylquinoline (6d)

**6d** was synthesized according to general procedure A using **4** and 4-fluorophenylacetylene (**5d**, 1.5 mmol, 180 mg) and was purified via column chromatography (heptane/dichloromethane 10:1). Yield: 188 mg (87%). mp. 159–160 °C.  $^1\text{H}$  NMR (300 MHz,  $\text{CDCl}_3$ ):  $\delta = 7.07$ – $7.16$  (m, 4H); 7.64– $7.71$  (m, 5H); 7.91 (s, 1H); 8.05 (dd,  $^3J = 7.18$  Hz,  $^4J = 1.32$  Hz, 1H); 8.35 (dd,  $^3J = 8.31$  Hz,  $^4J = 1.32$  Hz, 1H).  $^{13}\text{C}$  NMR (75 MHz,  $\text{CDCl}_3$ ):  $\delta = 84.1, 86.0, 96.1, 99.5$  ( $\text{C}\equiv\text{C}$ ); 115.7 (d,  $^2J = 22.0$  Hz, CH); 116.2 (d,  $^2J = 22.5$  Hz, CH); 117.7 (d,  $^4J = 3.30$  Hz, C); 119.3 (d,  $^4J = 3.85$  Hz, C); 119.9 (q,  $^3J = 1.65$  Hz, CH); 121.4 (q,  $^1J = 275.6$  Hz,  $\text{CF}_3$ ); 124.8 (C); 126.0 (CH); 128.4 (C); 128.6 (CH); 132.3 (C); 133.9 (d,  $^3J = 8.26$  Hz, CH); 134.1 (d,  $^3J = 8.25$  Hz, CH); 134.6 (CH); 147.0 (C); 147.8 (q,  $^2J = 35.4$  Hz, C- $\text{CF}_3$ ); 162.8 (d,  $^1J = 249.7$  Hz, CF); 163.4 (d,  $^1J = 251.9$  Hz, CF).  $^{19}\text{F}$  NMR (282 MHz,  $\text{CDCl}_3$ ):  $\delta = -110.27$  (CF);  $-107.85$  (CF);  $-67.52$  ( $\text{CF}_3$ ). IR (ATR,  $\text{cm}^{-1}$ ):  $\tilde{\nu} = 3053$  (w), 2217 (w), 2198 (m), 1891 (w), 1824 (w), 1760 (w), 1585 (m), 1507 (s), 1409 (m), 1279 (m), 1222 (s), 1150 (s), 1117 (s), 1094 (s), 933 (m), 879 (m), 830 (s), 765 (m), 748 (m), 649 (m), 530 (s). MS (EI, 70 eV):  $m/z$  (%) = 434 (24), 433 ( $\text{M}^+$ , 100), 365 (12), 364 (44). HRMS (EI, 70 eV): Calculated for  $\text{C}_{26}\text{H}_{12}\text{F}_5\text{N}$  ( $\text{M}^+$ ), 433.08844; measured 433.08898.

#### 4,8-Bis(4'-methoxyphenylethynyl)-2-trifluoromethylquinoline (6e)

**6e** was synthesized according to general procedure A using **4** and 4-methoxyphenylacetylene (**5e**, 1.5 mmol, 198 mg) and was purified via column chromatography (heptane/dichloromethane 4:1). Yield: 208 mg (91%). mp. 152–153 °C.  $^1\text{H}$  NMR (250 MHz,  $\text{CDCl}_3$ ):  $\delta$  = 3.85 (s, 3H, OMe); 3.87 (s, 3H, OMe); 6.91–6.97 (m, 4H); 7.59–7.71 (m, 5H); 7.88 (s, 1H); 8.02 (dd,  $^3J$  = 7.25 Hz,  $^4J$  = 1.42 Hz, 1H); 8.34 (dd,  $^3J$  = 8.35 Hz,  $^4J$  = 1.42 Hz, 1H).  $^{13}\text{C}$  NMR (63 MHz,  $\text{CDCl}_3$ ):  $\delta$  = 55.3, 55.4 (OMe); 83.6, 85.3, 97.3, 101.2 ( $\text{C}\equiv\text{C}$ ); 113.6 (C); 114.0, 114.3 (CH); 115.4 (C); 119.5 (q,  $^3J$  = 1.98 Hz, CH); 121.5 (q,  $^1J$  = 275.5 Hz,  $\text{CF}_3$ ); 125.2 (C); 125.7, 128.4 (CH); 128.5, 132.7 (C); 133.4, 133.7, 134.2 (CH); 147.0 (C); 147.6 (q,  $^2J$  = 35.1 Hz, C- $\text{CF}_3$ ); 159.9, 160.8 (C).  $^{19}\text{F}$  NMR (282 MHz,  $\text{CDCl}_3$ ):  $\delta$  = -67.51. IR (ATR,  $\text{cm}^{-1}$ ):  $\tilde{\nu}$  = 2920 (w), 2846 (w), 2203 (w), 1603 (m), 1565 (m), 1511 (m), 1458 (m), 1409 (m), 1294 (m), 1277 (m), 1248 (m), 1172 (m), 1116 (s), 1026 (s), 896 (m), 831 (s), 763 (s), 641 (m), 533 (s). MS (EI, 70 eV):  $m/z$  (%) = 458 (30), 457 ( $\text{M}^+$ , 100), 442 (12), 228 (10).

#### 4,8-Bis(3'-thienylethynyl)-2-trifluoromethylquinoline (6f)

**6f** was synthesized according to general procedure A using **4** and 3-ethynylthiophene (**5f**, 1.5 mmol, 150  $\mu\text{L}$ ) and was purified via column chromatography (heptane/dichloromethane 10:1). Yield: 198 mg (97%). mp. 163–164 °C.  $^1\text{H}$  NMR (300 MHz,  $\text{CDCl}_3$ ):  $\delta$  = 7.32–7.42 (m, 4H); 7.67–7.76 (m, 3H); 7.90 (s, 1H); 8.05 (dd,  $^3J$  = 7.17 Hz,  $^4J$  = 1.32 Hz, 1H); 8.35 (dd,  $^3J$  = 8.50 Hz,  $^4J$  = 1.32 Hz, 1H).  $^{13}\text{C}$  NMR (75 MHz,  $\text{CDCl}_3$ ):  $\delta$  = 84.2, 85.9, 92.2, 95.9 ( $\text{C}\equiv\text{C}$ ); 119.8 (q,  $^3J$  = 1.83 Hz, CH); 120.7 (C); 121.4 (q,  $^1J$  = 275.6 Hz,  $\text{CF}_3$ ); 122.4, 124.9 (C); 125.3, 125.9, 126.2 (CH); 128.4 (C); 128.5, 129.4, 129.8, 130.1, 131.1 (CH); 132.4 (C); 134.6 (CH); 147.0 (C); 147.8 (q,  $^2J$  = 35.2 Hz, C- $\text{CF}_3$ ).  $^{19}\text{F}$  NMR (282 MHz,  $\text{CDCl}_3$ ):  $\delta$  = -67.52. IR (ATR,  $\text{cm}^{-1}$ ):  $\tilde{\nu}$  = 3097 (w), 2922 (w), 2206 (m), 1899 (w), 1829 (w), 1766 (w), 1680 (w), 1587 (m), 1463 (m), 1406 (m), 1376 (m), 1305 (m), 1268 (m), 1170 (m), 1129 (s), 1113 (s), 973 (m), 884 (m), 822 (m), 773 (s), 762 (s), 679 (m), 615 (m), 549 (m). MS (EI, 70 eV):  $m/z$  (%) = 411 (12), 410 (26), 409 ( $\text{M}^+$ , 100), 340 (19). HRMS (EI, 70 eV): Calculated for  $\text{C}_{22}\text{H}_{10}\text{S}_2\text{F}_3\text{N}$  ( $\text{M}^+$ ), 409.02013; measured 409.02073.

#### 4,8-Bis(cyclopropylethynyl)-2-trifluoromethylquinoline (6g)

**6g** was synthesized according to general procedure A using **4** and cyclopropylacetylene (**5g**, 1.5 mmol, 130  $\mu\text{L}$ ) and was purified via column chromatography (heptane/dichloromethane 10:1). Yield: 151 mg (93%). mp. 90–91 °C.  $^1\text{H}$  NMR (300 MHz,  $\text{CDCl}_3$ ):  $\delta$  = 0.94–1.06 (m, 8H); 1.57–1.67 (m, 2H); 7.57 (pt,  $^3J$  = 7.84 Hz, 1H); 7.71 (s, 1H); 7.87 (dd,  $^3J$  = 7.36 Hz,  $^4J$  = 1.32 Hz, 1H); 8.15 (dd,  $^3J$  = 8.30 Hz,  $^4J$  = 1.32 Hz, 1H).  $^{13}\text{C}$  NMR (75 MHz,  $\text{CDCl}_3$ ):  $\delta$  = 0.57, 0.78 (CH); 8.08, 9.42 ( $\text{CH}_2$ ); 71.5, 72.5, 101.7, 106.3 ( $\text{C}\equiv\text{C}$ ); 119.7 (q,  $^3J$  = 1.65 Hz, CH); 121.4 (q,  $^1J$  = 275.3 Hz,  $\text{CF}_3$ ); 125.3 (CH); 125.4 (C); 128.2 (CH); 128.9, 133.2 (C); 134.4 (CH); 147.2 (C); 147.5 (q,  $^2J$  = 35.0 Hz, C- $\text{CF}_3$ ).  $^{19}\text{F}$  NMR (282 MHz,  $\text{CDCl}_3$ ):  $\delta$  = -67.57. IR (ATR,  $\text{cm}^{-1}$ ):  $\tilde{\nu}$  = 3013 (w), 2924 (w), 2853 (w), 2218 (m), 1741 (w), 1588 (m), 1502 (m), 1466 (m), 1409 (m), 1305

(m), 1270 (m), 1233 (m), 1174 (m), 1127 (s), 1106 (s), 1027 (m), 949 (m), 874 (s), 811 (m), 766 (s), 742 (m), 707 (m), 645 (m). MS (EI, 70 eV):  $m/z$  (%) = 326 (19), 325 ( $M^+$ , 100), 297 (12), 296 (20), 257 (21), 256 (93), 255 (66), 254 (56), 253 (13), 252 (14), 241 (12), 229 (13), 228 (37), 227 (13), 226 (15), 215 (11). HRMS (EI, 70 eV): Calculated for  $C_{20}H_{14}F_3N$  ( $M^+$ ), 325.10729; measured 325.10682.

#### 4,6-Bis(phenylethynyl)-2-trifluoromethylquinoline (9a)

**9a** was synthesized according to general procedure A using **8** and phenylacetylene (**5a**, 1.5 mmol, 165  $\mu$ L) and was purified via column chromatography (heptane/dichloromethane 10:1). Yield: 152 mg (77%). mp. 110–111 °C.  $^1H$  NMR (250 MHz,  $CDCl_3$ ):  $\delta$  = 7.38–7.41 (m, 3H); 7.45–7.46 (m, 3H); 7.60–7.64 (m, 2H); 7.69–7.73 (m, 2H); 7.90 (s, 1H); 7.93 (dd,  $^3J$  = 8.82 Hz,  $^4J$  = 1.73 Hz, 1H); 8.19 (d,  $^3J$  = 8.82 Hz, 1H); 8.53 (d,  $^4J$  = 1.73 Hz, 1H).  $^{13}C$  NMR (63 MHz,  $CDCl_3$ ):  $\delta$  = 84.2, 88.7, 92.5, 101.0 ( $C\equiv C$ ); 119.9 (q,  $^3J$  = 1.83 Hz, CH); 121.3 (q,  $^1J$  = 275.5 Hz,  $CF_3$ ); 121.6, 122.6, 124.4, 128.2 (C); 128.5, 128.7, 128.9, 129.9, 130.5 (CH); 131.6 (C); 131.8, 132.1, 133.8 (CH); 146.5 (C); 147.8 (q,  $^2J$  = 34.9 Hz,  $C-CF_3$ ).  $^{19}F$  NMR (282 MHz,  $CDCl_3$ ):  $\delta$  = -67.66. IR (ATR,  $cm^{-1}$ ):  $\tilde{\nu}$  = 3054 (w), 2922 (w), 2851 (w), 2211 (m), 1954 (w), 1876 (w), 1819 (w), 1764 (w), 1578 (m), 1491 (m), 1443 (m), 1392 (m), 1365 (m), 1317 (m), 1278 (m), 1173 (m), 1120 (s), 1093 (s), 918 (m), 888 (m), 844 (m), 752 (s), 684 (s), 542 (m), 526 (m). MS (EI, 70 eV):  $m/z$  (%) = 398 (29), 397 ( $M^+$ , 100), 325 (10). HRMS (EI, 70 eV): Calculated for  $C_{26}H_{14}F_3N$  ( $M^+$ ), 397.10729; measured 397.10747.

#### 4,6-Bis(4'-tert-butylphenylethynyl)-2-trifluoromethylquinoline (9b)

**9b** was synthesized according to general procedure A using **8** and 4-*tert*-butylphenylacetylene (**5b**, 1.5 mmol, 270  $\mu$ L) and was purified via column chromatography (heptane/dichloromethane 10:1). Yield: 215 mg (84%). mp. 94–95 °C.  $^1H$  NMR (300 MHz,  $CDCl_3$ ):  $\delta$  = 1.36 (s, 9H, *t*-Bu); 1.38 (s, 9H, *t*-Bu); 7.42 (d,  $^3J$  = 8.49 Hz, 2H); 7.48 (d,  $^3J$  = 8.49 Hz, 2H); 7.56 (d,  $^3J$  = 8.49 Hz, 2H); 7.66 (d,  $^3J$  = 8.49 Hz, 2H); 7.89 (s, 1H); 7.93 (dd,  $^3J$  = 8.68 Hz,  $^4J$  = 1.89 Hz, 1H); 8.18 (d,  $^3J$  = 8.68 Hz, 1H); 8.53 (d,  $^4J$  = 1.89 Hz, 1H).  $^{13}C$  NMR (63 MHz,  $CDCl_3$ ):  $\delta$  = 31.1, 31.2 ( $CH_3$ ); 34.9, 35.0 ( $C(Me)_3$ ); 83.8, 88.2, 92.8, 101.4 ( $C\equiv C$ ); 118.6, 119.6 (C); 119.7 (q,  $^3J$  = 2.27 Hz, CH); 121.3 (q,  $^1J$  = 275.4 Hz,  $CF_3$ ); 124.6 (C); 125.5, 125.7 (CH); 128.3 (C); 128.9, 130.4, 131.6 (CH); 131.8 (C); 131.9, 133.9 (CH); 146.5 (C); 147.7 (q,  $^2J$  = 34.8 Hz,  $C-CF_3$ ); 152.3, 153.5 (C).  $^{19}F$  NMR (282 MHz,  $CDCl_3$ ):  $\delta$  = -67.63. IR (ATR,  $cm^{-1}$ ):  $\tilde{\nu}$  = 2959 (m), 2867 (w), 2207 (m), 1912 (w), 1579 (m), 1505 (m), 1463 (m), 1392 (m), 1363 (m), 1278 (m), 1184 (m), 1132 (s), 1091 (s), 920 (m), 878 (m), 832 (s), 711 (m), 559 (s). MS (EI, 70 eV):  $m/z$  (%) = 510 (34), 509 ( $M^+$ , 94), 495 (35), 494 (100), 438 (11), 240 (23), 211 (18), 57 (19), 41 (20). HRMS (EI, 70 eV): Calculated for  $C_{34}H_{30}F_3N$  ( $M^+$ ), 509.23249; measured 509.23344.

#### 4,6-Bis(4'-cyanophenylethynyl)-2-trifluoromethylquinoline (9c)

**9c** was synthesized according to general procedure A using **8** and 4-cyanophenylacetylene (**5c**, 1.5 mmol, 191 mg). During aqueous work-up the product precipitates. The solid was filtered and washed with dichloromethane. Product **9c** was insoluble even at high temperatures, thus making an NMR impossible. Yield: 43 mg (20%). mp. 242–243 °C. IR (ATR, cm<sup>-1</sup>):  $\tilde{\nu}$  = 3078 (w), 2226 (m), 1925 (w), 1731 (w), 1673 (w), 1601 (m), 1502 (m), 1396 (m), 1319 (w), 1286 (m), 1173 (m), 1125 (s), 1092 (s), 971 (m), 834 (s), 720 (m), 614 (m), 552 (s). MS (EI, 70 eV):  $m/z$  (%) = 448 (32), 447 (M<sup>+</sup>, 100), 223 (10). HRMS (EI, 70 eV): Calculated for C<sub>28</sub>H<sub>12</sub>F<sub>3</sub>N<sub>3</sub> (M<sup>+</sup>), 447.09778; measured 447.09839.

#### 4,6-Bis(4'-fluorophenylethynyl)-2-trifluoromethylquinoline (9d)

**9d** was synthesized according to general procedure A using **8** and 4-fluorophenylacetylene (**5d**, 1.5 mmol, 180 mg) and was purified via column chromatography (heptane/dichloromethane 10:1). Yield: 183 mg (85%). mp. 197–198 °C. <sup>1</sup>H NMR (300 MHz, CDCl<sub>3</sub>):  $\delta$  = 7.07–7.19 (m, 4H); 7.57–7.61 (m, 2H); 7.67–7.72 (m, 2H); 7.88 (s, 1H); 7.91 (dd, <sup>3</sup> $J$  = 8.88 Hz, <sup>4</sup> $J$  = 1.89 Hz, 1H); 8.19 (d, <sup>3</sup> $J$  = 8.88 Hz, 1H); 8.48 (d, <sup>4</sup> $J$  = 1.89 Hz, 1H). <sup>13</sup>C NMR (75 MHz, CDCl<sub>3</sub>):  $\delta$  = 83.9, 88.4, 91.5, 99.9 (C≡C); 115.9 (d, <sup>2</sup> $J$  = 22.0 Hz, CH); 116.2 (d, <sup>2</sup> $J$  = 22.5 Hz, CH); 117.7 (d, <sup>4</sup> $J$  = 3.85 Hz, C); 118.6 (d, <sup>4</sup> $J$  = 3.85 Hz, C); 120.0 (q, <sup>3</sup> $J$  = 2.20 Hz, CH); 121.3 (q, <sup>1</sup> $J$  = 275.6 Hz, CF<sub>3</sub>); 124.3, 128.1 (C); 128.8, 130.7 (CH); 131.5 (C); 133.7 (d, <sup>3</sup> $J$  = 8.80 Hz, CH); 133.8 (CH); 134.2 (d, <sup>3</sup> $J$  = 8.80 Hz, CH); 146.6 (C); 147.9 (q, <sup>2</sup> $J$  = 35.2 Hz, C-CF<sub>3</sub>); 162.9 (d, <sup>1</sup> $J$  = 250.8 Hz, CF); 163.5 (d, <sup>1</sup> $J$  = 252.5 Hz, CF). <sup>19</sup>F NMR (282 MHz, CDCl<sub>3</sub>):  $\delta$  = -109.53 (CF); -107.75 (CF); -67.71 (CF<sub>3</sub>). IR (ATR, cm<sup>-1</sup>):  $\tilde{\nu}$  = 3056 (w), 2922 (w), 2852 (w), 2214 (m), 1577 (m), 1508 (s), 1397 (m), 1317 (m), 1278 (m), 1218 (m), 1174 (m), 1134 (s), 1088 (m), 917 (m), 888 (m), 877 (m), 832 (s), 749 (m), 729 (m), 639 (m), 530 (s). MS (EI, 70 eV):  $m/z$  (%) = 434 (28), 433 (M<sup>+</sup>, 100), 361 (8), 216 (8). HRMS (EI, 70 eV): Calculated for C<sub>26</sub>H<sub>12</sub>F<sub>5</sub>N (M<sup>+</sup>), 433.08844; measured 433.08831.

#### 4,6-Bis(4'-methoxyphenylethynyl)-2-trifluoromethylquinoline (9e)

**9e** was synthesized according to general procedure A using **8** and 4-methoxyphenylacetylene (**5e**, 1.5 mmol, 198 mg) and was purified via column chromatography (heptane/dichloromethane 4:1). Yield: 192 mg (84%). mp. 131–132 °C. <sup>1</sup>H NMR (300 MHz, CDCl<sub>3</sub>):  $\delta$  = 3.85 (s, 3H, OMe); 3.87 (s, 3H, OMe); 6.92 (d, <sup>3</sup> $J$  = 8.88 Hz, 2H); 6.97 (d, <sup>3</sup> $J$  = 8.88 Hz, 2H); 7.55 (d, <sup>3</sup> $J$  = 8.67 Hz, 2H); 7.65 (d, <sup>3</sup> $J$  = 8.67 Hz, 2H); 7.85 (s, 1H); 7.89 (dd, <sup>3</sup> $J$  = 8.88 Hz, <sup>4</sup> $J$  = 1.89 Hz, 1H); 8.15 (d, <sup>3</sup> $J$  = 8.88 Hz, 1H); 8.49 (d, <sup>4</sup> $J$  = 1.89 Hz, 1H). <sup>13</sup>C NMR (75 MHz, CDCl<sub>3</sub>):  $\delta$  = 55.3, 55.4 (OMe); 83.5, 87.7, 92.7, 101.6 (C≡C); 113.6 (C); 114.1, 114.4 (CH); 114.7 (C); 119.6 (q, <sup>3</sup> $J$  = 2.02 Hz, CH); 121.4 (q, <sup>1</sup> $J$  = 275.6 Hz, CF<sub>3</sub>); 124.6, 128.3 (C); 128.6, 130.4 (CH); 132.0 (C); 133.4, 133.8, 133.9 (CH); 146.5 (C); 147.6 (q, <sup>2</sup> $J$  = 34.8 Hz, C-CF<sub>3</sub>); 160.1, 160.9 (C). <sup>19</sup>F NMR (282 MHz, CDCl<sub>3</sub>):  $\delta$  = -67.66. IR (ATR, cm<sup>-1</sup>):  $\tilde{\nu}$  = 2934 (w), 2840 (w), 2544 (w), 2202 (m), 2051 (w), 1980 (w), 1891 (w), 1742 (w), 1600 (m), 1573 (m), 1509 (s), 1464 (m), 1392 (m), 1317 (m),

1293 (m), 1276 (m), 1247 (s), 1169 (s), 1132 (s), 1089 (s), 1022 (s), 917 (m), 889 (m), 871 (m), 825 (s), 728 (m), 615 (m), 531 (s). MS (EI, 70 eV):  $m/z$  (%) = 458 (31), 457 ( $M^+$ , 100), 229 (11). HRMS (EI, 70 eV): Calculated for  $C_{28}H_{18}F_3O_2N$  ( $M^+$ ), 457.12841; measured 457.12837.

#### 4,6-Bis(3'-thienylethynyl)-2-trifluoromethylquinoline (9f)

**9f** was synthesized according to general procedure A using **8** and 3-ethynylthiophene (**5f**, 1.5 mmol, 150  $\mu$ L) and was purified via column chromatography (heptane/dichloromethane 10:1). Yield: 174 mg (85%). mp. 157–158 °C.  $^1H$  NMR (300 MHz,  $CDCl_3$ ):  $\delta$  = 7.26–7.42 (m, 4H); 7.64 (dd,  $^4J$  = 3.02 Hz,  $^4J$  = 1.32 Hz, 1H); 7.79 (dd,  $^4J$  = 3.02 Hz,  $^4J$  = 1.32 Hz, 1H); 7.87 (s, 1H); 7.90 (dd,  $^3J$  = 8.67 Hz,  $^4J$  = 1.89 Hz, 1H); 8.17 (d,  $^3J$  = 8.67 Hz, 1H); 8.49 (d,  $^4J$  = 1.89 Hz, 1H).  $^{13}C$  NMR (63 MHz,  $CDCl_3$ ):  $\delta$  = 83.9, 87.7, 88.3, 96.2 (C $\equiv$ C); 119.8 (q,  $^3J$  = 2.14 Hz, CH); 120.7 (C); 121.3 (q,  $^1J$  = 275.1 Hz,  $CF_3$ ); 121.6, 124.3 (C); 125.7, 126.1 (CH); 128.2 (C); 128.8, 129.7, 129.8, 129.9, 130.5, 131.2 (CH); 131.7 (C); 133.7 (CH); 146.5 (C); 147.8 (q,  $^2J$  = 35.2 Hz, C- $CF_3$ ).  $^{19}F$  NMR (282 MHz,  $CDCl_3$ ):  $\delta$  = -67.68. IR (ATR,  $cm^{-1}$ ):  $\tilde{\nu}$  = 3100 (w), 2922 (w), 2200 (m), 1959 (w), 1760 (w), 1578 (m), 1490 (m), 1362 (m), 1317 (m), 1266 (m), 1174 (m), 1123 (s), 1093 (s), 944 (m), 883 (m), 846 (m), 778 (s), 716 (m), 620 (s), 555 (m). MS (EI, 70 eV):  $m/z$  (%) = 411 (12), 410 (26), 409 ( $M^+$ , 100). HRMS (EI, 70 eV): Calculated for  $C_{22}H_{10}S_2F_3N$  ( $M^+$ ), 409.02013; measured 409.01962.

#### 4,6-Bis(cyclopropylethynyl)-2-trifluoromethylquinoline (9g)

**9g** was synthesized according to general procedure A using **8** and cyclopropylacetylene (**5g**, 1.5 mmol, 130  $\mu$ L) and was purified via column chromatography (heptane/dichloromethane 10:1). Yield: 132 mg (81%). mp. 103–104 °C.  $^1H$  NMR (300 MHz,  $CDCl_3$ ):  $\delta$  = 0.88–0.96 (m, 4H); 0.99–1.07 (m, 4H); 1.49–1.57 (m, 1H); 1.60–1.69 (m, 1H); 7.68 (s, 1H); 7.72 (dd,  $^3J$  = 8.70 Hz,  $^4J$  = 1.89 Hz, 1H); 8.05 (d,  $^3J$  = 8.70 Hz, 1H); 8.24 (d,  $^4J$  = 1.89 Hz, 1H).  $^{13}C$  NMR (75 MHz,  $CDCl_3$ ):  $\delta$  = 0.34, 0.68 (CH); 8.86, 9.49 (CH<sub>2</sub>); 71.4, 75.5, 96.9, 106.7 (C $\equiv$ C); 119.7 (q,  $^3J$  = 2.38 Hz, CH); 121.4 (q,  $^1J$  = 275.2 Hz,  $CF_3$ ); 124.8, 128.7 (C); 128.7, 130.2 (CH); 132.3 (C); 133.9 (CH); 146.2 (C); 147.4 (q,  $^2J$  = 34.7 Hz, C- $CF_3$ ).  $^{19}F$  NMR (282 MHz,  $CDCl_3$ ):  $\delta$  = -67.75. IR (ATR,  $cm^{-1}$ ):  $\tilde{\nu}$  = 3013 (w), 2224 (m), 1580 (m), 1491 (m), 1403 (m), 1342 (m), 1316 (m), 1257 (m), 1131 (s), 1090 (m), 1029 (m), 976 (m), 900 (m), 876 (s), 842 (m), 810 (m), 689 (m). MS (EI, 70 eV):  $m/z$  (%) = 326 (22), 325 ( $M^+$ , 100), 289 (10), 240 (19). HRMS (EI, 70 eV): Calculated for  $C_{20}H_{14}F_3N$  ( $M^+$ ), 325.10729; measured 325.10708.

#### 3,4,8-Tris(phenylethynyl)-2-trifluoromethylquinoline (12a)

**12a** was synthesized according to general procedure B using **11** and phenylacetylene (**5a**, 2.0 mmol, 220  $\mu$ L) and was purified via column chromatography (heptane/dichloromethane 15:1). Yield: 187 mg (75%). mp. 126–127 °C.  $^1H$  NMR (300 MHz,  $CDCl_3$ ):  $\delta$  = 7.38–7.47 (m, 9H); 7.63–7.74 (m, 7H); 8.01 (dd,  $^3J$  = 7.18 Hz,  $^4J$  = 1.13 Hz, 1H); 8.34 (dd,  $^3J$  = 8.31 Hz,  $^4J$  = 1.13 Hz, 1H).  $^{13}C$  NMR (75 MHz,  $CDCl_3$ ):  $\delta$  =

83.4, 84.3, 86.1, 97.3, 101.5, 105.1 (C≡C); 116.9 (C); 121.2 (q,  $^1J = 276.5$  Hz, CF<sub>3</sub>); 121.9, 122.5, 123.2, 125.0 (C); 126.0 (CH); 127.7 (C); 128.4, 128.5, 128.7, 129.2, 129.3, 129.9, 131.8, 132.0, 132.1, 134.5 (CH); 137.7, 144.3 (C); 147.2 (q,  $^2J = 33.5$  Hz, C-CF<sub>3</sub>).  $^{19}\text{F}$  NMR (282 MHz, CDCl<sub>3</sub>):  $\delta = -66.36$ . IR (ATR, cm<sup>-1</sup>):  $\tilde{\nu} = 3052$  (w), 2923 (w), 2852 (w), 2203 (w), 1955 (w), 1882 (w), 1732 (w), 1672 (w), 1595 (m), 1493 (s), 1468 (m), 1441 (m), 1332 (m), 1294 (m), 1186 (m), 1114 (s), 1068 (m), 1008 (m), 931 (m), 750 (s), 684 (s), 513 (s). MS (EI, 70 eV):  $m/z$  (%) = 498 (36), 497 (M<sup>+</sup>, 100), 428 (10), 426 (13). HRMS (EI, 70 eV): Calculated for C<sub>34</sub>H<sub>18</sub>F<sub>3</sub>N (M<sup>+</sup>), 497.13859; measured 497.13817.

### 3,4,8-Tris(4'-*tert*-butylphenylethynyl)-2-trifluoromethylquinoline (12b)

**12b** was synthesized according to general procedure B using **11** and 4-*tert*-butylphenylacetylene (**5b**, 2.0 mmol, 360  $\mu\text{L}$ ) and was purified via column chromatography (heptane/dichloromethane 15:1). Yield: 230 mg (70%). mp. 175–176 °C.  $^1\text{H}$  NMR (300 MHz, CDCl<sub>3</sub>):  $\delta = 1.36$  (s, 18H, 2x *t*-Bu); 1.38 (s, 9H, *t*-Bu); 7.42–7.48 (m, 6H); 7.59–7.69 (m, 7H); 8.00 (dd,  $^3J = 7.17$  Hz,  $^4J = 1.13$  Hz, 1H); 8.34 (dd,  $^3J = 8.31$  Hz,  $^4J = 1.13$  Hz, 1H).  $^{13}\text{C}$  NMR (75 MHz, CDCl<sub>3</sub>):  $\delta = 31.1, 31.2, 31.3$  (CH<sub>3</sub>); 34.9, 35.0, 35.1 (C(Me)<sub>3</sub>); 82.9, 84.0, 85.6, 97.5, 101.7, 105.5 (C≡C); 117.0, 119.0, 119.6, 120.7 (C); 121.3 (q,  $^1J = 276.7$  Hz, CF<sub>3</sub>); 125.2 (C); 125.4, 125.5, 125.7, 125.8 (CH); 127.9 (C); 129.1, 131.6, 131.7, 131.9, 134.3 (CH); 134.8, 144.3 (C); 147.3 (q,  $^2J = 33.4$  Hz, C-CF<sub>3</sub>); 152.0, 152.7, 153.5 (C).  $^{19}\text{F}$  NMR (282 MHz, CDCl<sub>3</sub>):  $\delta = -66.41$ . IR (ATR, cm<sup>-1</sup>):  $\tilde{\nu} = 2961$  (m), 2204 (m), 1901 (w), 1603 (w), 1554 (w), 1514 (m), 1467 (m), 1363 (m), 1266 (m), 1181 (s), 1128 (s), 1016 (m), 1006 (m), 936 (m), 830 (s), 773 (s), 705 (m), 627 (m), 557 (s). MS (EI, 70 eV):  $m/z$  (%) = 667 (18), 666 (65), 665 (M<sup>+</sup>, 100), 651 (30), 650 (70), 318 (10). HRMS (EI, 70 eV): Calculated for C<sub>46</sub>H<sub>42</sub>F<sub>3</sub>N (M<sup>+</sup>), 665.32639; measured 665.32484.

### 3,4,8-Tris(4'-cyanophenylethynyl)-2-trifluoromethylquinoline (12c)

**12c** was synthesized according to general procedure B using **11** and 4-cyanophenylacetylene (**5c**, 2.0 mmol, 254 mg). During aqueous work-up the product precipitates. The solid was filtered and washed with dichloromethane. Product **12c** was insoluble even at high temperatures, thus making an NMR impossible. Yield: 186 mg (65%). mp. 307–308 °C. IR (ATR, cm<sup>-1</sup>):  $\tilde{\nu} = 3091$  (w), 2935 (w), 2674 (w), 2490 (w), 2223 (s), 1918 (w), 1740 (w), 1601 (s), 1500 (m), 1391 (m), 1334 (m), 1301 (m), 1254 (m), 1185 (s), 1124 (s), 1008 (m), 933 (m), 834 (s), 771 (s), 725 (m), 639 (m), 550 (s). MS (EI, 70 eV):  $m/z$  (%) = 573 (26), 572 (M<sup>+</sup>, 67), 527 (13), 525 (13), 447 (18), 444 (25), 443 (100), 429 (16), 308 (10), 256 (13), 229 (15), 185 (17), 183 (20), 152 (17). HRMS (EI, 70 eV): Calculated for C<sub>37</sub>H<sub>15</sub>F<sub>3</sub>N<sub>4</sub> ([M+H]<sup>+</sup>), 573.13216; measured 573.13294.

### 3,4,8-Tris(4'-fluorophenylethynyl)-2-trifluoromethylquinoline (12d)

**12d** was synthesized according to general procedure B using **11** and 4-fluorophenylacetylene (**5d**, 2.0 mmol, 240 mg) and was purified via column chromatography (heptane/dichloromethane 15:1).



Yield: 175 mg (64%). mp. 190–191 °C.  $^1\text{H}$  NMR (300 MHz,  $\text{CDCl}_3$ ):  $\delta$  = 7.06–7.14 (m, 6H); 7.54–7.67 (m, 7H); 7.94 (dd,  $^3J$  = 7.18 Hz,  $^4J$  = 1.32 Hz, 1H); 8.22 (dd,  $^3J$  = 8.31 Hz,  $^4J$  = 1.32 Hz, 1H).  $^{13}\text{C}$  NMR (75 MHz,  $\text{CDCl}_3$ ):  $\delta$  = 83.0, 84.0, 85.4, 96.3, 100.3, 103.9 ( $\text{C}\equiv\text{C}$ ); 115.7 (d,  $^2J$  = 22.0 Hz, CH); 116.0 (d,  $^2J$  = 22.0 Hz, CH); 116.2 (d,  $^2J$  = 22.5 Hz, CH); 116.7 (C); 117.9 (d,  $^4J$  = 3.85 Hz, C); 118.5 (d,  $^4J$  = 3.85 Hz, C); 119.3 (d,  $^4J$  = 3.30 Hz, C); 121.2 (q,  $^1J$  = 276.7 Hz,  $\text{CF}_3$ ); 124.9 (C); 125.8 (CH); 127.6 (C); 129.2 (CH); 133.7 (d,  $^3J$  = 8.25 Hz, CH); 133.9 (d,  $^3J$  = 8.80 Hz, CH); 134.0 (d,  $^3J$  = 8.80 Hz, CH); 134.4 (CH); 134.5, 144.2 (C); 147.1 (q,  $^2J$  = 33.3 Hz, C- $\text{CF}_3$ ); 162.8 (d,  $^1J$  = 250.3 Hz, CF); 163.2 (d,  $^1J$  = 251.4 Hz, CF); 163.5 (d,  $^1J$  = 252.5 Hz, CF).  $^{19}\text{F}$  NMR (282 MHz,  $\text{CDCl}_3$ ):  $\delta$  = -110.08 (CF); -108.62 (CF); -107.49 (CF); -66.41 ( $\text{CF}_3$ ). IR (ATR,  $\text{cm}^{-1}$ ):  $\tilde{\nu}$  = 3053 (w), 2925 (w), 2560 (w), 2206 (m), 1888 (w), 1598 (m), 1551 (w), 1505 (s), 1333 (m), 1222 (s), 1191 (m), 1151 (s), 1114 (s), 1090 (m), 1011 (m), 933 (m), 827 (s), 800 (m), 768 (s), 740 (m), 689 (m), 600 (m), 526 (s). MS (EI, 70 eV):  $m/z$  (%) = 552 (38), 551 ( $\text{M}^+$ , 100), 480 (10), 275 (10). HRMS (EI, 70 eV): Calculated for  $\text{C}_{34}\text{H}_{15}\text{F}_6\text{N}$  ( $\text{M}^+$ ), 551.11032; measured 551.11194.

### 3,4,8-Tris(4'-methoxyphenylethynyl)-2-trifluoromethylquinoline (12e)

**12e** was synthesized according to general procedure B using **11** and 4-methoxyphenylacetylene (**5e**, 2.0 mmol, 264 mg) and was purified via column chromatography (heptane/dichloromethane 2:1). Yield: 204 mg (70%). mp. 119–120 °C.  $^1\text{H}$  NMR (300 MHz,  $\text{CDCl}_3$ ):  $\delta$  = 3.85 (s, 6H, 2x OMe); 3.86 (s, 3H, OMe); 6.90–6.94 (m, 6H); 7.54–7.68 (m, 7H); 7.94 (dd,  $^3J$  = 7.38 Hz,  $^4J$  = 1.32 Hz, 1H); 8.28 (dd,  $^3J$  = 8.31 Hz,  $^4J$  = 1.32 Hz, 1H).  $^{13}\text{C}$  NMR (75 MHz,  $\text{CDCl}_3$ ):  $\delta$  = 55.2, 55.3, 55.4 (OMe); 82.6, 83.8, 85.2, 97.4, 101.5, 105.6 ( $\text{C}\equiv\text{C}$ ); 114.0, 114.2, 114.3 (CH); 114.7, 115.4, 116.9 (C); 121.4 (q,  $^1J$  = 276.7 Hz,  $\text{CF}_3$ ); 125.2 (C); 125.6 (CH); 127.8 (C); 128.9, 133.4, 133.5, 133.7, 133.8 (CH); 134.6, 144.1 (C); 147.0 (q,  $^2J$  = 33.6 Hz, C- $\text{CF}_3$ ); 159.9, 160.4, 160.9 (C).  $^{19}\text{F}$  NMR (282 MHz,  $\text{CDCl}_3$ ):  $\delta$  = -66.42. IR (ATR,  $\text{cm}^{-1}$ ):  $\tilde{\nu}$  = 3063 (w), 3004 (w), 2931 (w), 2837 (w), 2542 (w), 2199 (m), 2050 (w), 1886 (w), 1602 (m), 1566 (w), 1509 (s), 1455 (m), 1440 (m), 1415 (w), 1363 (w), 1334 (w), 1291 (m), 1247 (s), 1168 (m), 1130 (s), 1029 (s), 934 (m), 824 (s), 768 (s), 739 (m), 689 (m), 640 (m), 530 (s). MS (EI, 70 eV):  $m/z$  (%) = 589 (30), 588 (63), 587 ( $\text{M}^+$ , 100), 457 (10), 149 (11), 99 (20), 97 (15), 85 (12), 83 (14), 71 (18), 69 (19), 57 (32), 56 (11), 55 (19), 44 (81), 43 (19), 41 (17). HRMS (EI, 70 eV): Calculated for  $\text{C}_{37}\text{H}_{24}\text{F}_3\text{O}_3\text{N}$  ( $\text{M}^+$ ), 587.17028; measured 587.17191.

### 3,4,8-Tris(3'-thienylethynyl)-2-trifluoromethylquinoline (12f)

**12f** was synthesized according to general procedure B using **11** and 3-ethynylthiophene (**5f**, 2.0 mmol, 200  $\mu\text{L}$ ) and was purified via column chromatography (heptane/dichloromethane 15:1). Yield: 181 mg (70%). mp. 155–156 °C.  $^1\text{H}$  NMR (300 MHz,  $\text{CDCl}_3$ ):  $\delta$  = 7.27–7.41 (m, 6H); 7.65–7.76 (m, 4H); 7.98 (dd,  $^3J$  = 7.17 Hz,  $^4J$  = 1.32 Hz, 1H); 8.28 (dd,  $^3J$  = 8.31 Hz,  $^4J$  = 1.32 Hz, 1H).  $^{13}\text{C}$  NMR (63 MHz,  $\text{CDCl}_3$ ):  $\delta$  = 82.9, 84.1, 85.7, 92.4, 96.6, 100.3 ( $\text{C}\equiv\text{C}$ ); 116.9, 121.1 (C); 121.2 (q,  $^1J$  = 276.4 Hz,  $\text{CF}_3$ ); 121.7, 122.3,

124.6 (C); 125.4, 125.9, 126.2 (CH); 127.7 (C); 129.1, 129.5, 129.7, 129.8, 130.1, 130.2, 131.1, 134.4 (CH); 134.7, 144.2 (C); 146.8 (q,  $^2J = 33.4$  Hz, C-CF<sub>3</sub>). <sup>19</sup>F NMR (282 MHz, CDCl<sub>3</sub>):  $\delta = -66.43$ . IR (ATR, cm<sup>-1</sup>):  $\tilde{\nu} = 3106$  (w), 2922 (m), 2207 (m), 1524 (w), 1470 (m), 1369 (m), 1296 (m), 1177 (m), 1124 (s), 1078 (m), 972 (m), 868 (m), 779 (s), 769 (s), 687 (m), 620 (s), 554 (m). MS (EI, 70 eV):  $m/z$  (%) = 517 (18), 516 (32), 515 (M<sup>+</sup>, 100). HRMS (ESI): Calculated for C<sub>28</sub>H<sub>12</sub>S<sub>3</sub>F<sub>3</sub>N ([M+H]<sup>+</sup>), 516.01567; measured 516.01564.

### 3,4,8-Tris(cyclopropylethynyl)-2-trifluoromethylquinoline (12g)

**12g** was synthesized according to general procedure B using **11** and cyclopropylacetylene (**5g**, 2.0 mmol, 170  $\mu$ L) and was purified via column chromatography (heptane/dichloromethane 15:1). Yield: 132 mg (68%). mp. 120–121 °C. <sup>1</sup>H NMR (300 MHz, CDCl<sub>3</sub>):  $\delta = 0.91$ – $1.12$  (m, 12H);  $1.54$ – $1.72$  (m, 3H); 7.53 (pt,  $^3J = 7.84$  Hz, 1H); 7.79 (dd,  $^3J = 7.36$  Hz,  $^4J = 1.32$  Hz, 1H); 8.08 (dd,  $^3J = 8.31$  Hz,  $^4J = 1.32$  Hz, 1H). <sup>13</sup>C NMR (63 MHz, CDCl<sub>3</sub>):  $\delta = 0.76$ , 0.92, 1.00 (CH); 9.08, 9.27, 9.92 (CH<sub>2</sub>); 69.7, 71.3, 72.4, 101.8, 105.9, 101.4 (C $\equiv$ C); 117.3 (C); 121.2 (q,  $^1J = 276.6$  Hz, CF<sub>3</sub>); 125.2 (CH); 125.3, 128.2 (C); 128.6, 134.0 (CH); 135.5, 144.1 (C); 147.3 (q,  $^2J = 32.9$  Hz, C-CF<sub>3</sub>). <sup>19</sup>F NMR (282 MHz, CDCl<sub>3</sub>):  $\delta = -66.71$ . IR (ATR, cm<sup>-1</sup>):  $\tilde{\nu} = 3095$  (w), 3010 (w), 2923 (w), 2852 (w), 2219 (m), 1590 (w), 1474 (m), 1368 (m), 1294 (m), 1206 (m), 1162 (m), 1120 (s), 1028 (m), 947 (m), 873 (m), 811 (m), 769 (s), 692 (m), 565 (m). MS (EI, 70 eV):  $m/z$  (%) = 390 (27), 389 (M<sup>+</sup>, 100), 388 (18), 321 (19), 320 (65), 319 (19), 318 (24), 317 (14), 316 (12), 305 (16), 304 (43), 303 (28), 302 (23), 292 (16), 291 (25), 290 (25), 289 (21), 279 (19), 278 (37), 277 (10), 276 (10), 265 (12), 263 (10), 145 (15). HRMS (ESI): Calculated for C<sub>25</sub>H<sub>18</sub>F<sub>3</sub>N ([M+H]<sup>+</sup>), 390.14641; measured 390.14629.

4. NMR-Spectra ( $^1\text{H}$ -,  $^{13}\text{C}$ -, dept, and  $^{19}\text{F}$ -NMR)  
 (The spectra are listed in the order  $^1\text{H}$ -NMR,  $^{13}\text{C}$ -NMR, dept, and lastly  $^{19}\text{F}$ -NMR.)

### 3 - 8-Bromo-2-trifluoromethyl-4-quinolinone

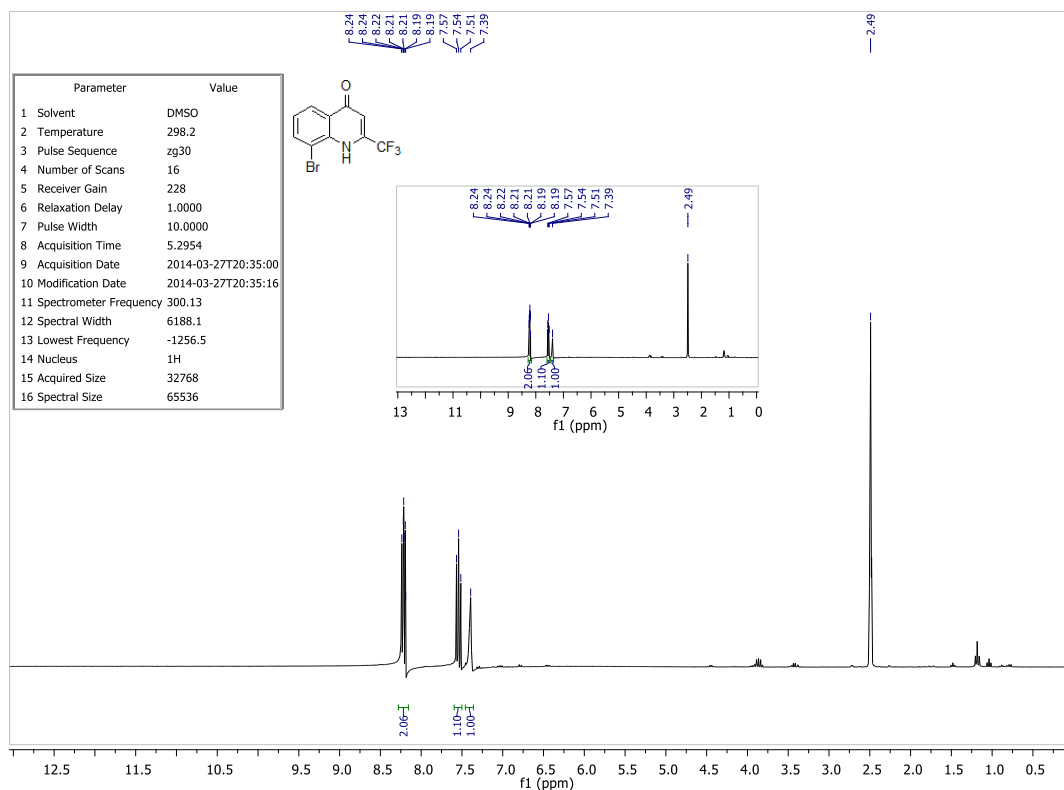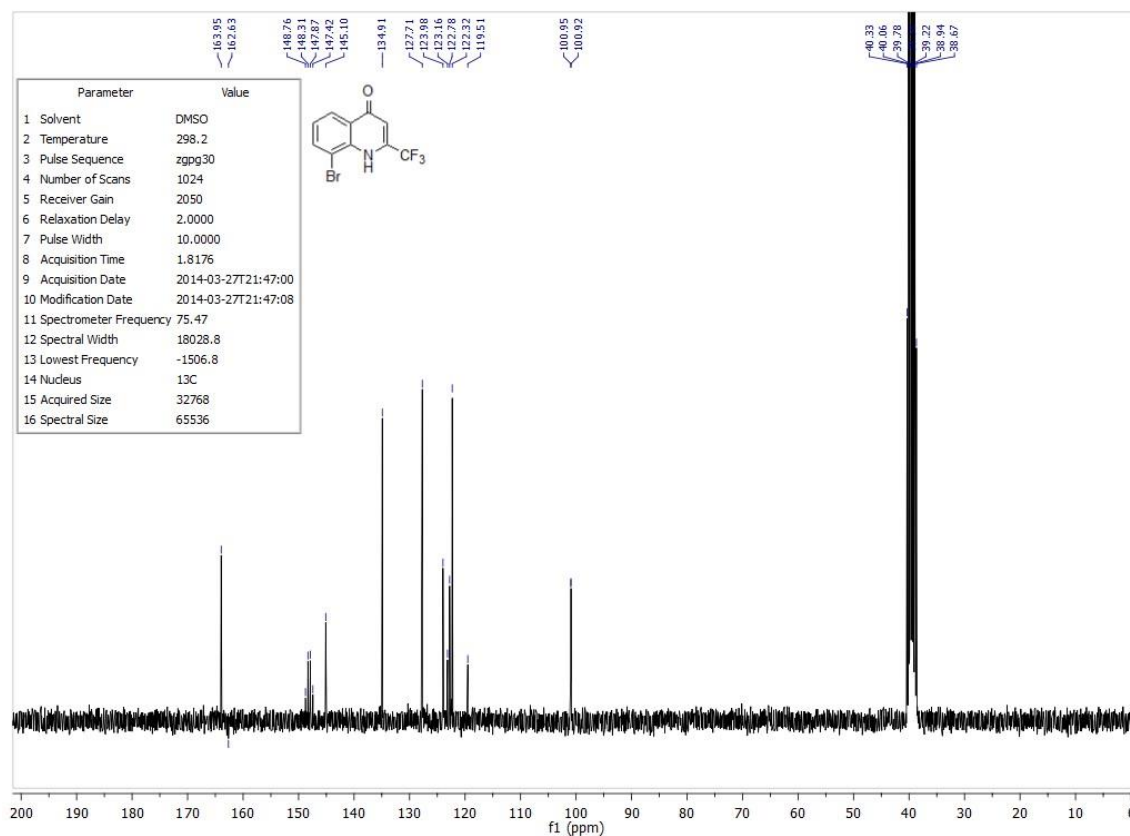

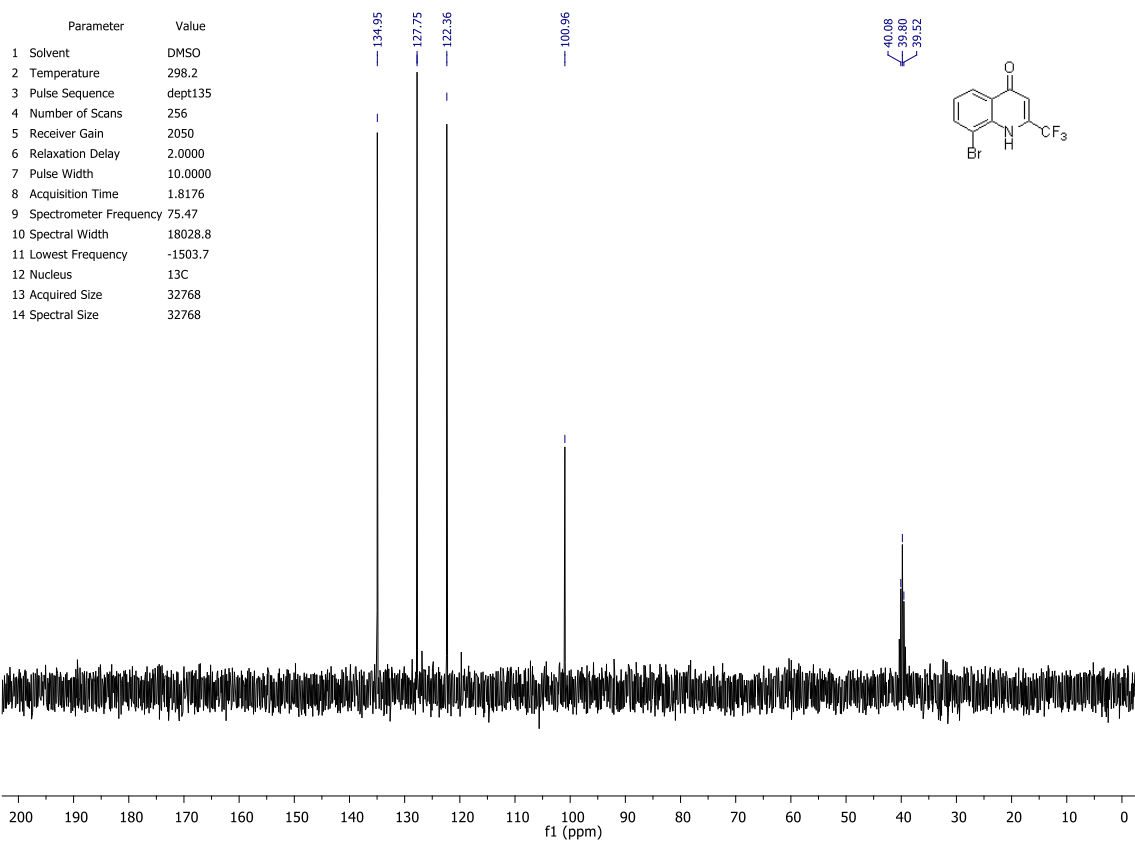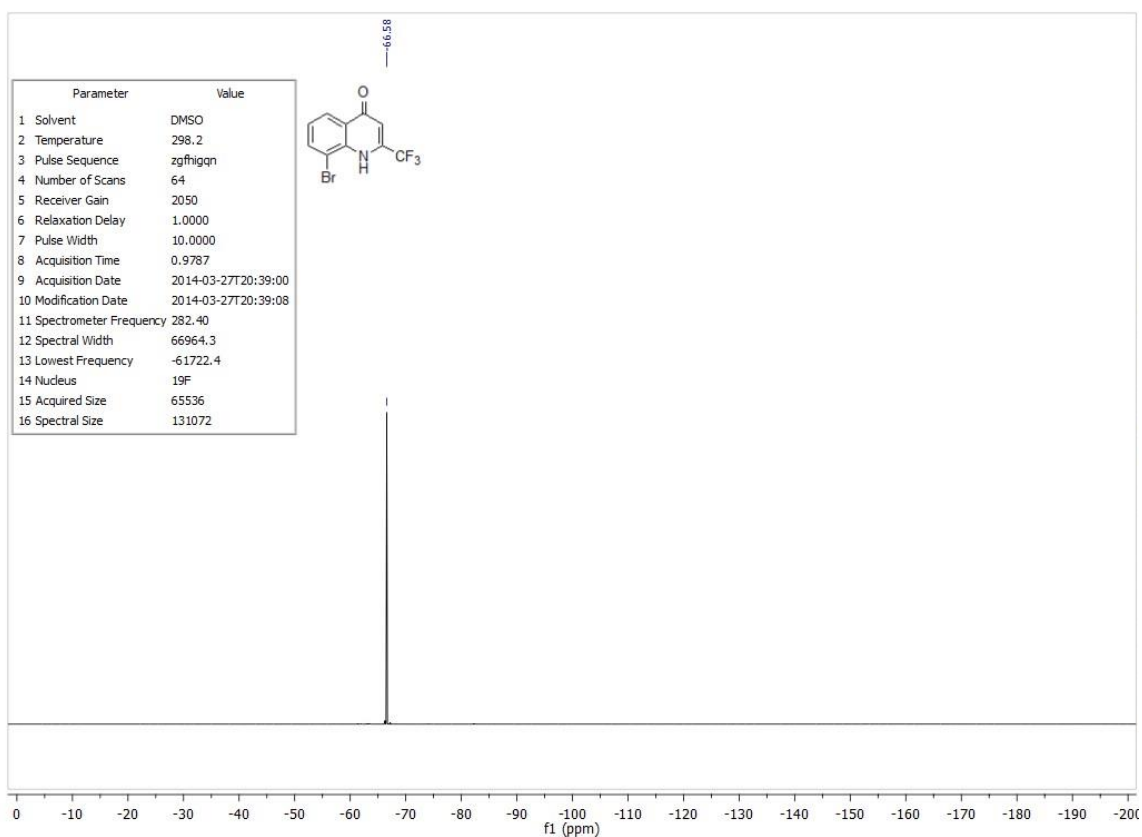

# 4 - 4,8-Dibromo-2-trifluoromethylquinoline

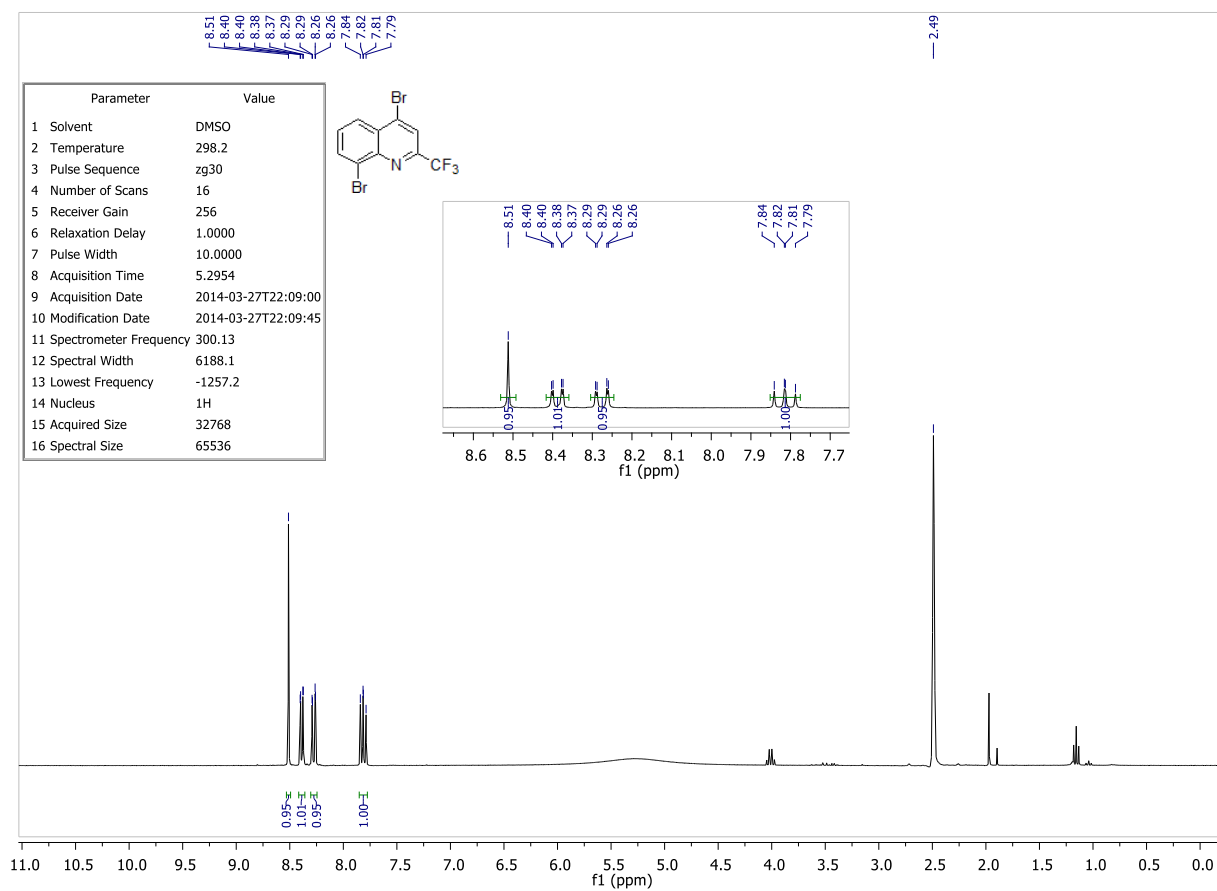

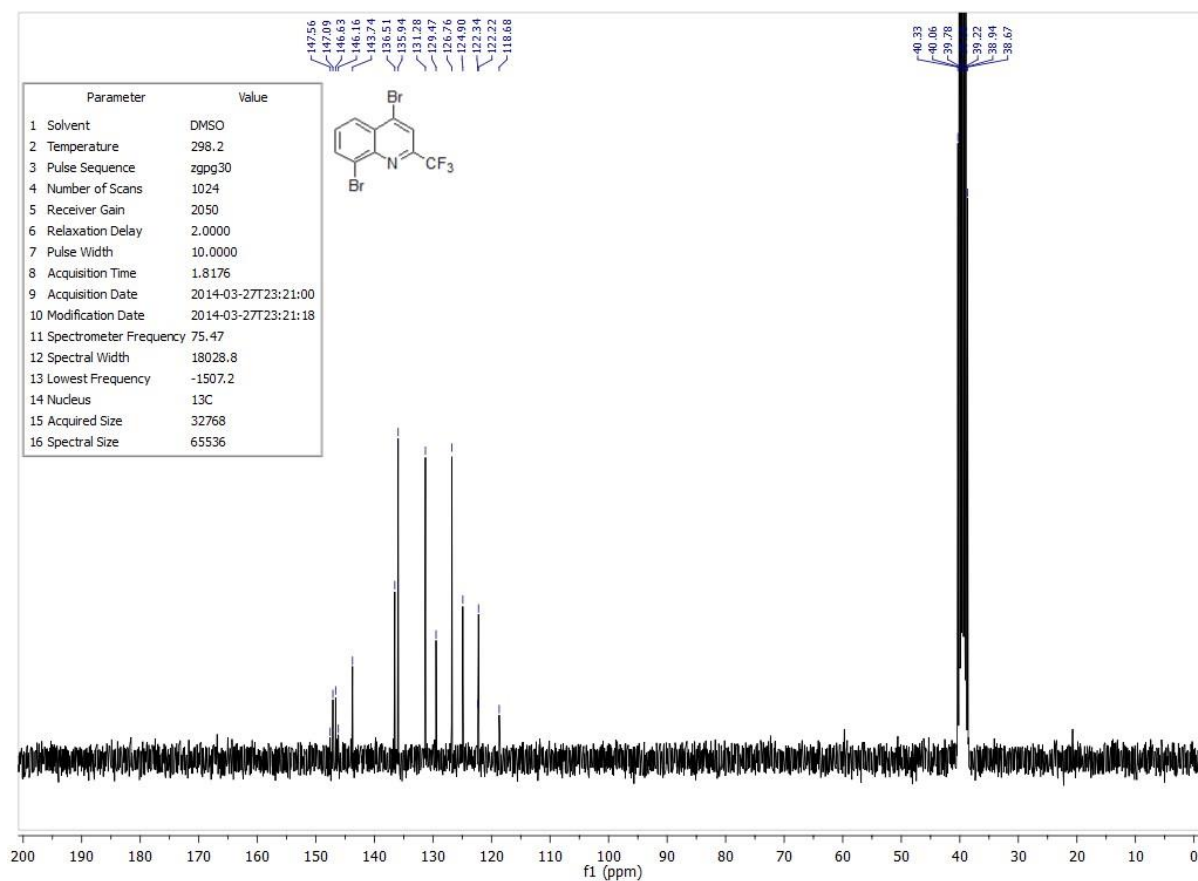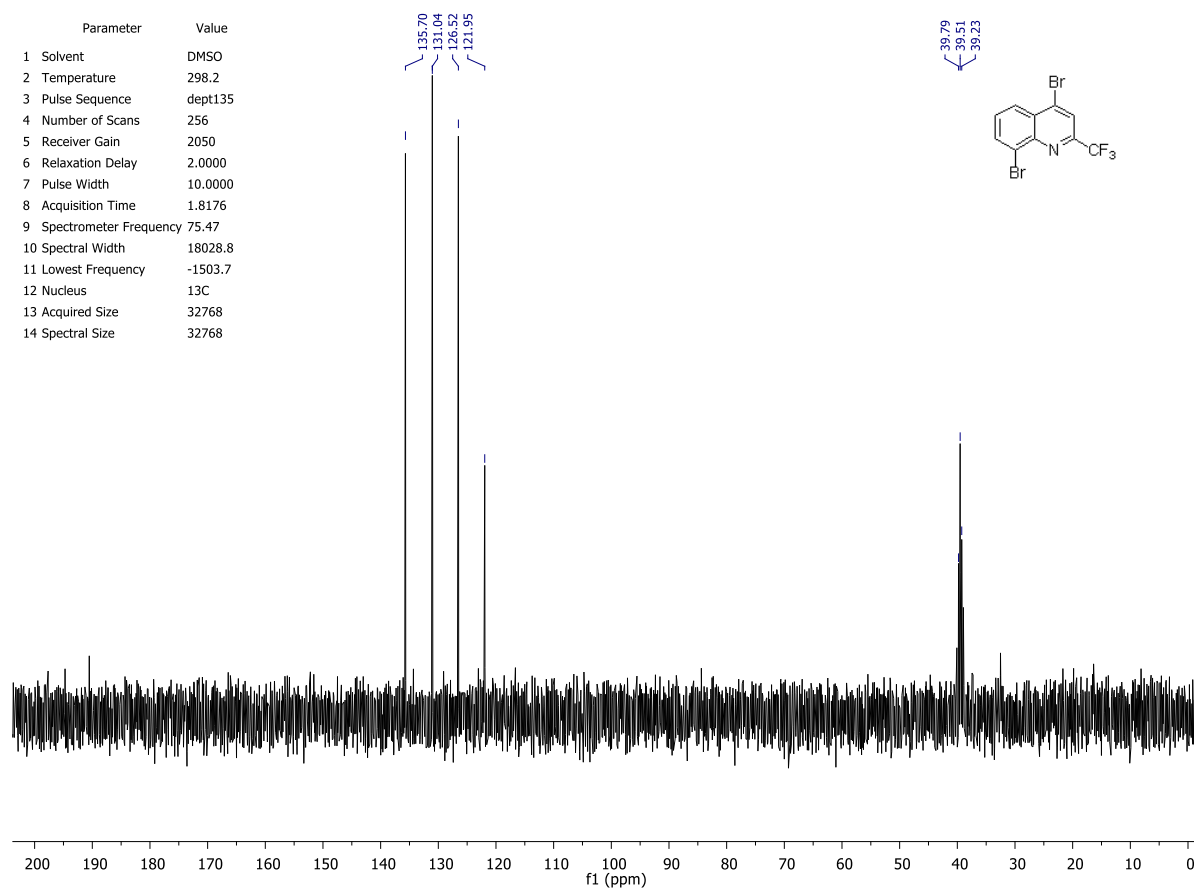

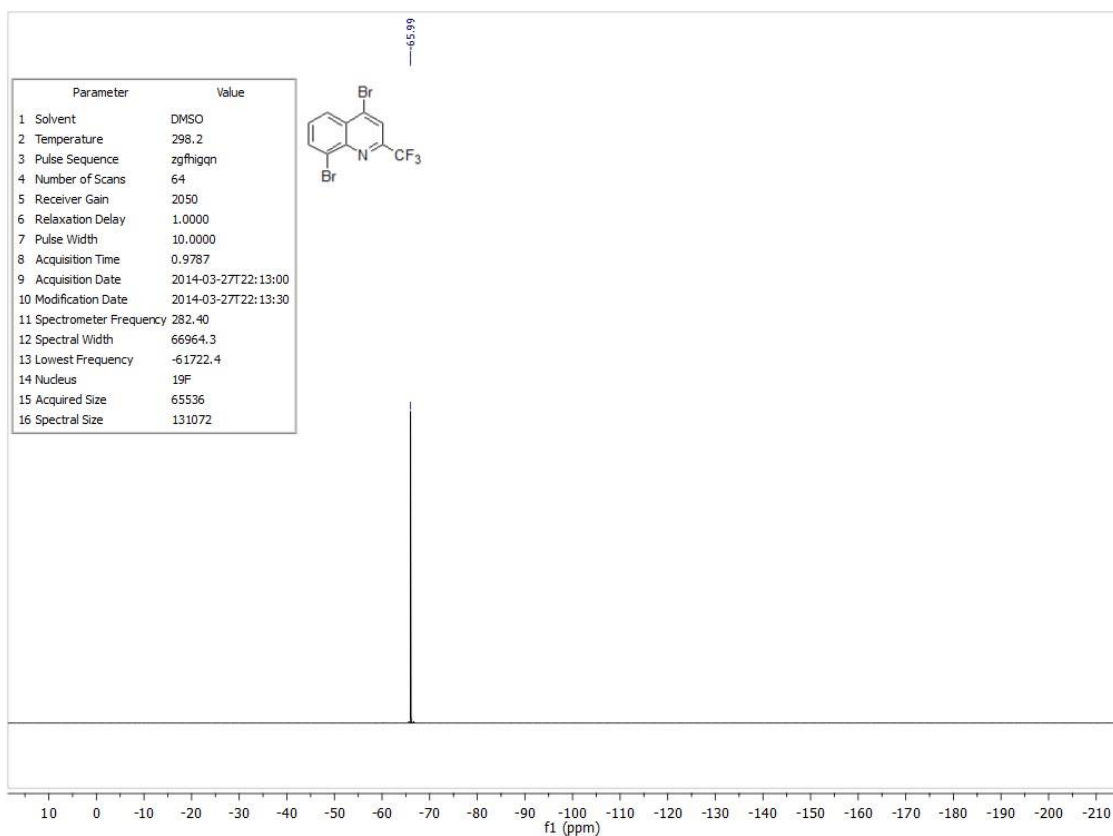

## 7 - 6-Bromo-2-trifluoromethyl-4-quinolinone

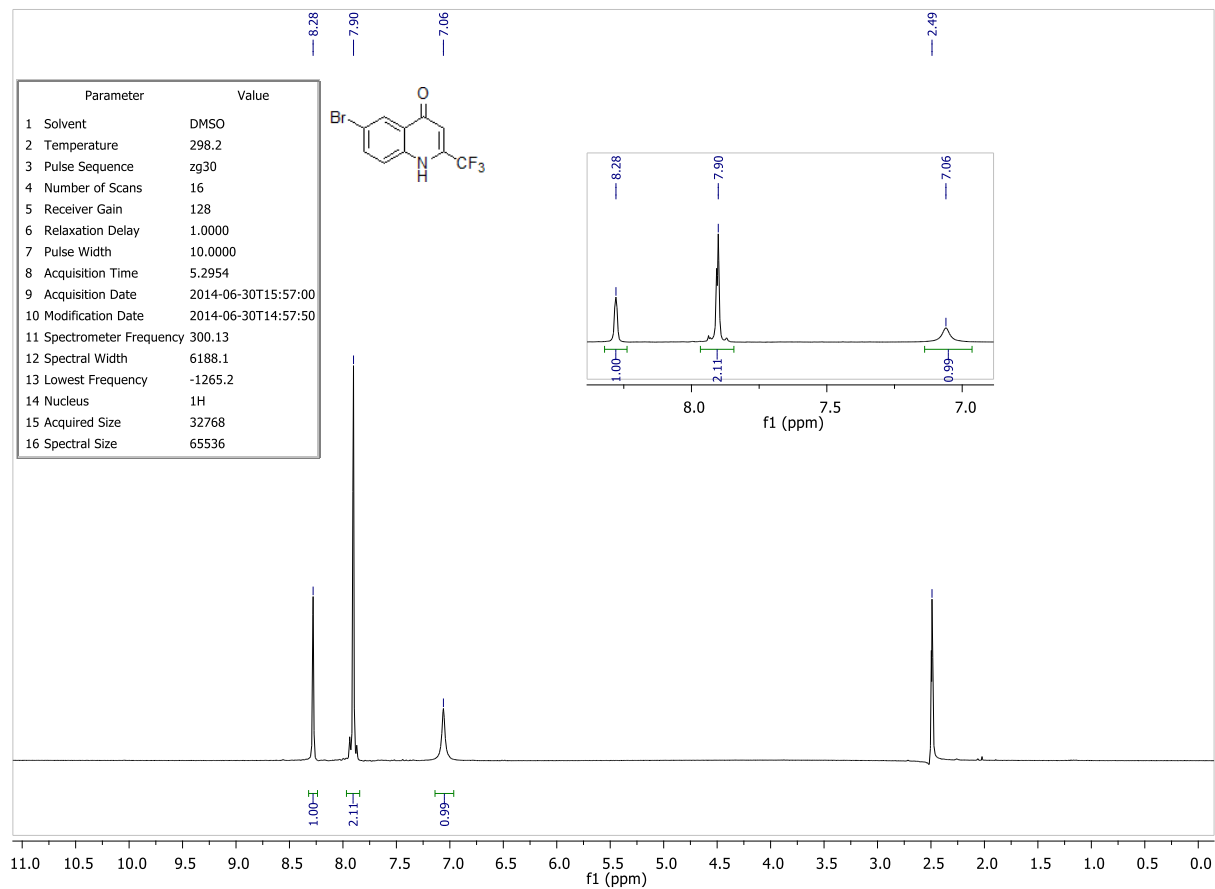

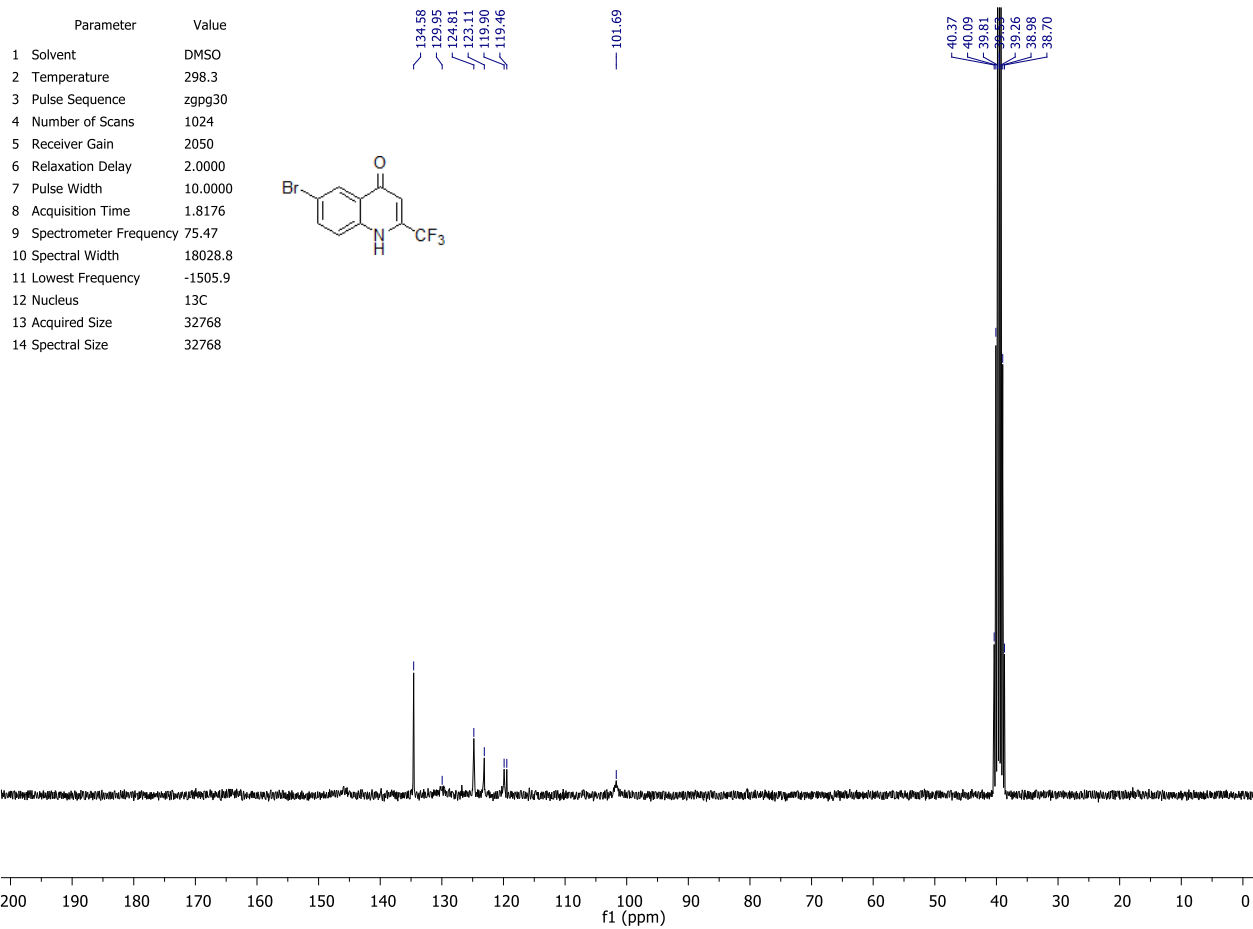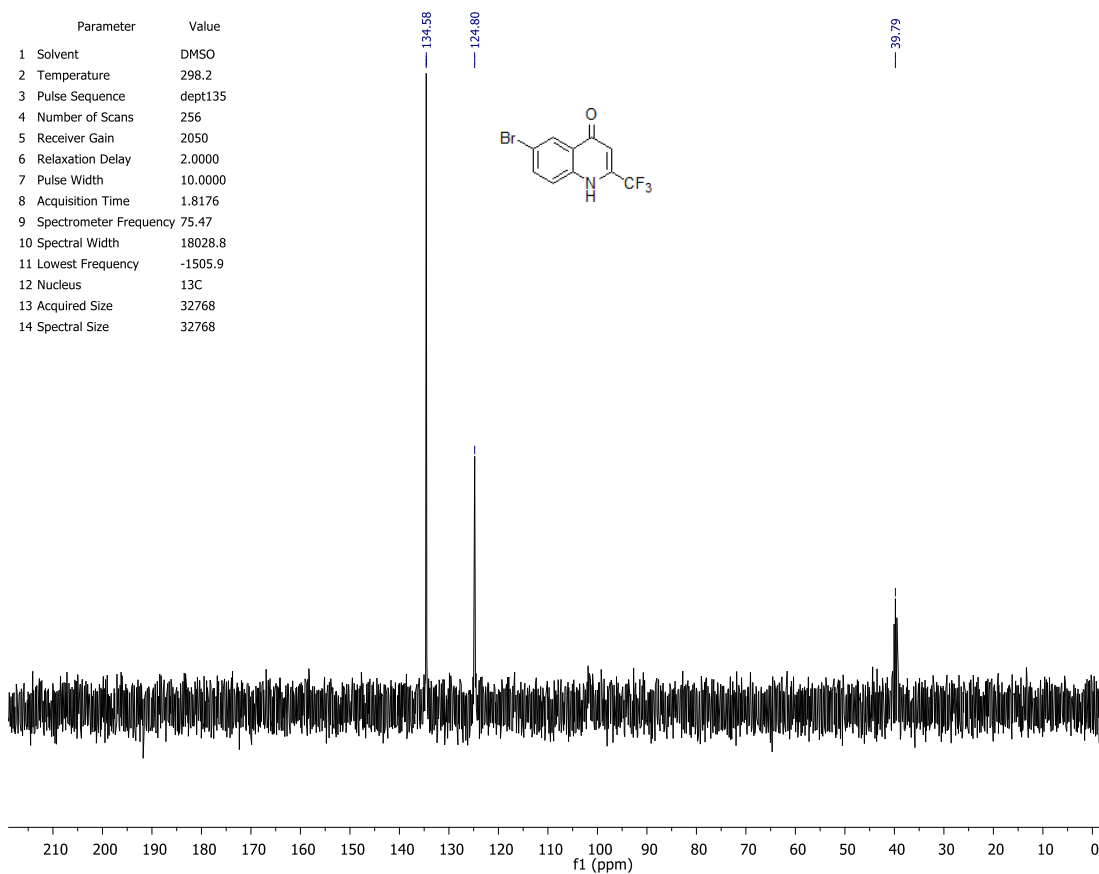



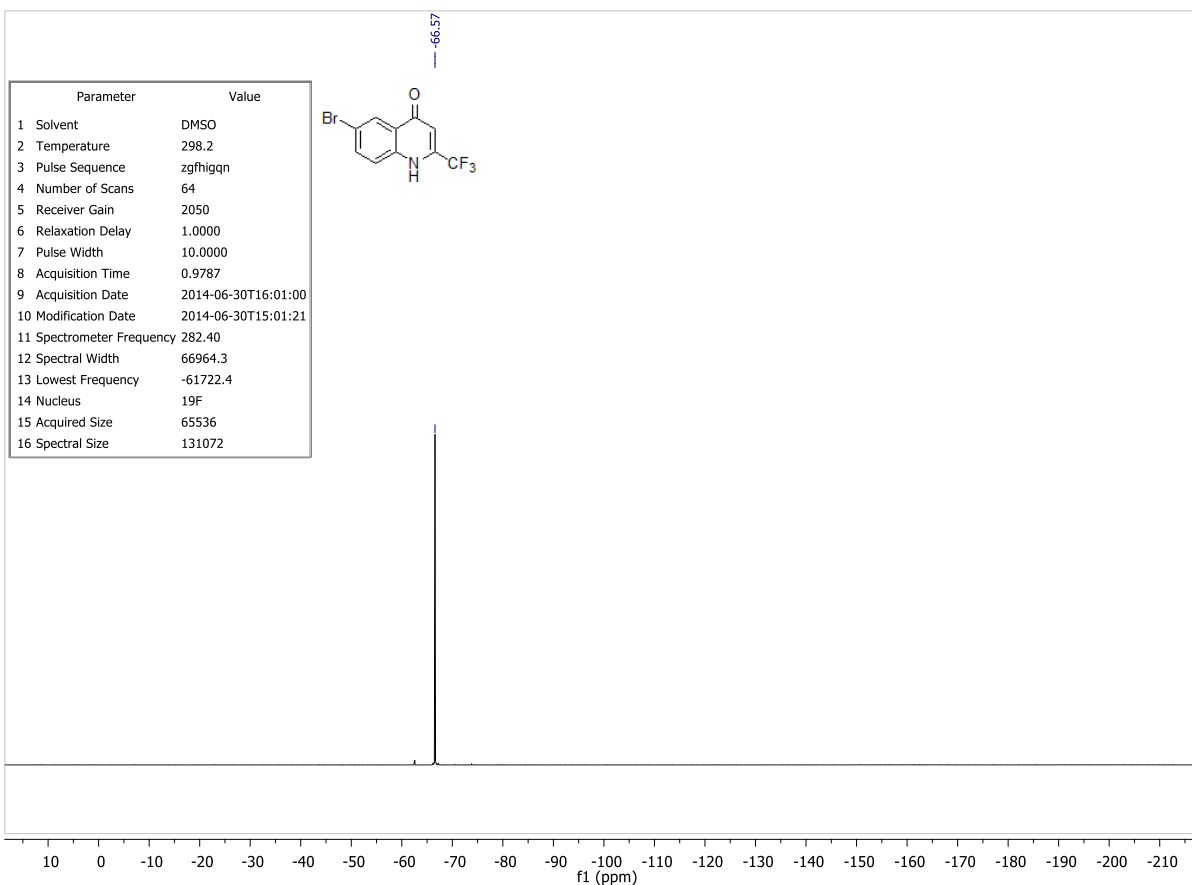

# 8 - 4,6-Dibromo-2-trifluoromethylquinoline

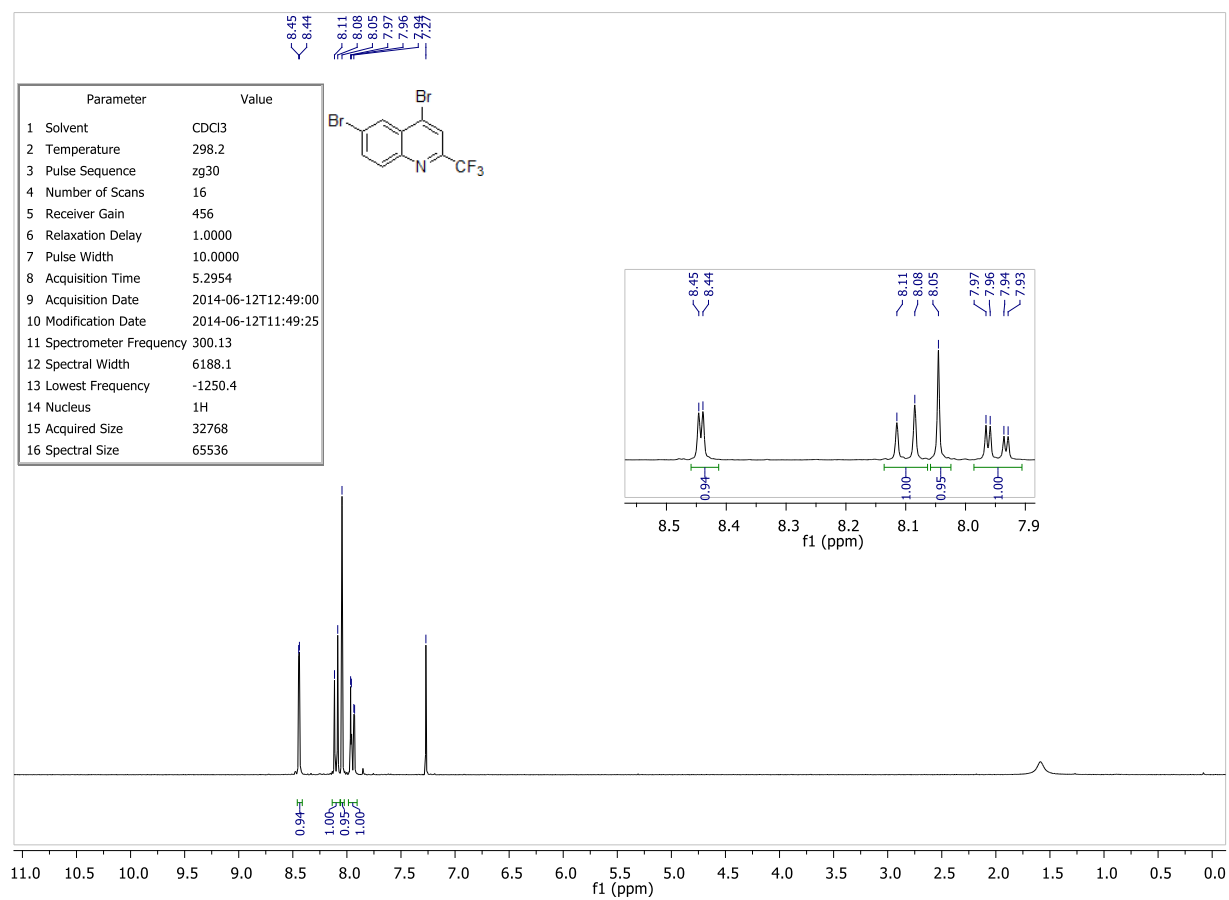

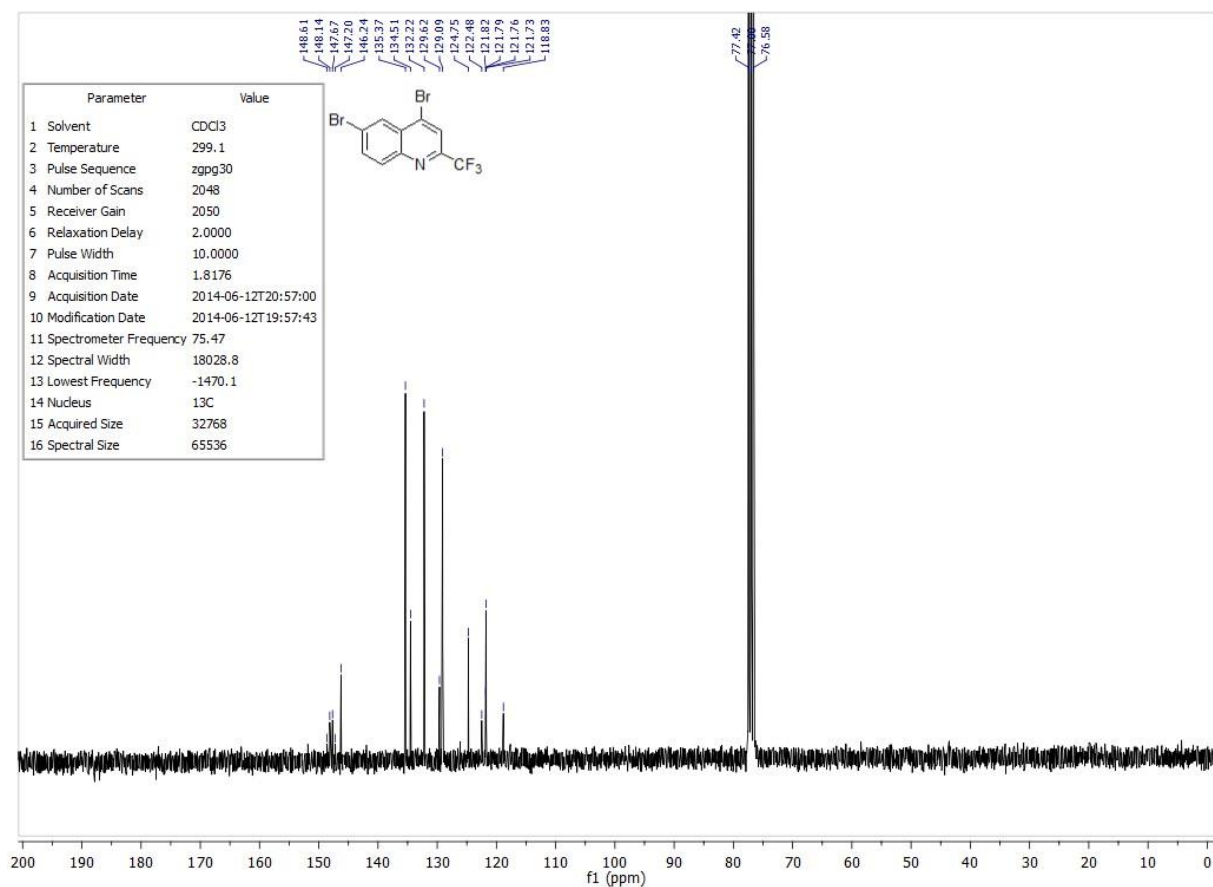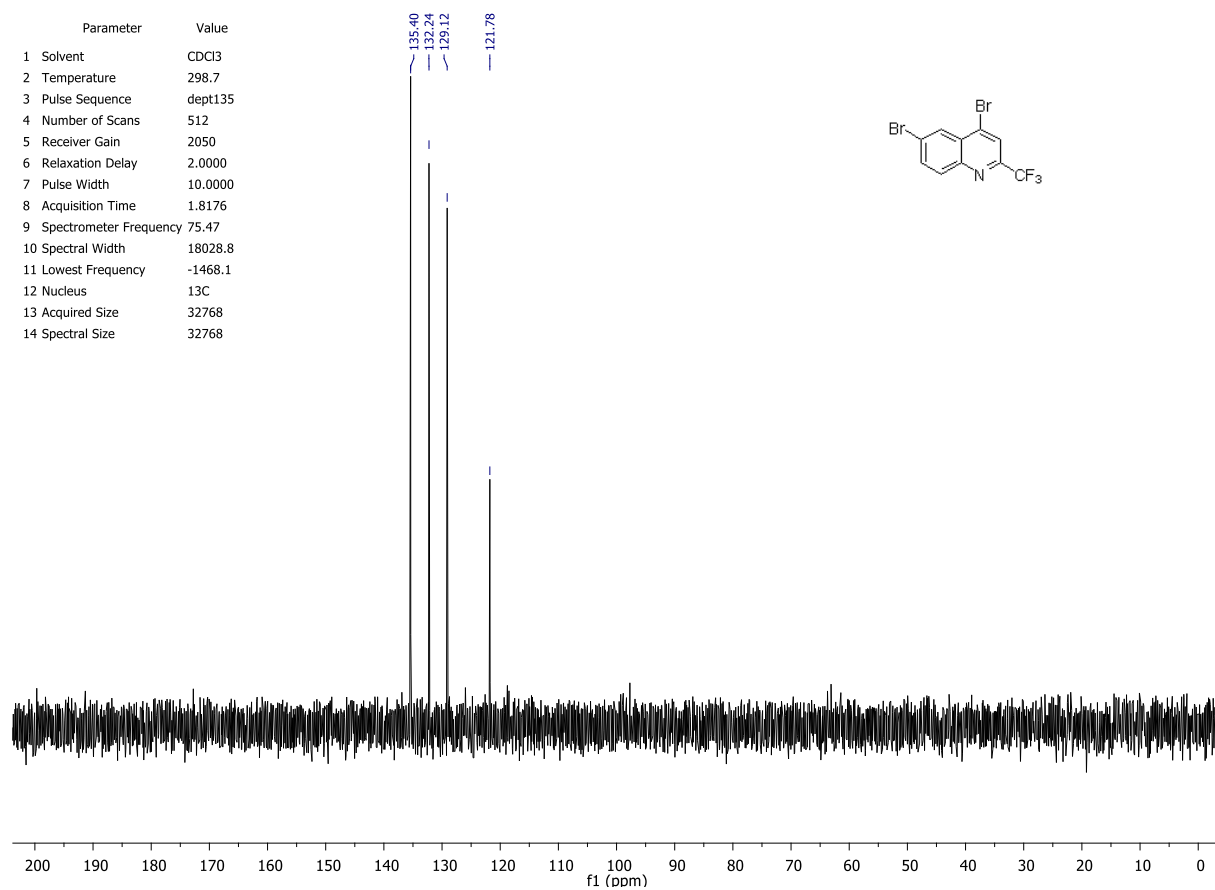

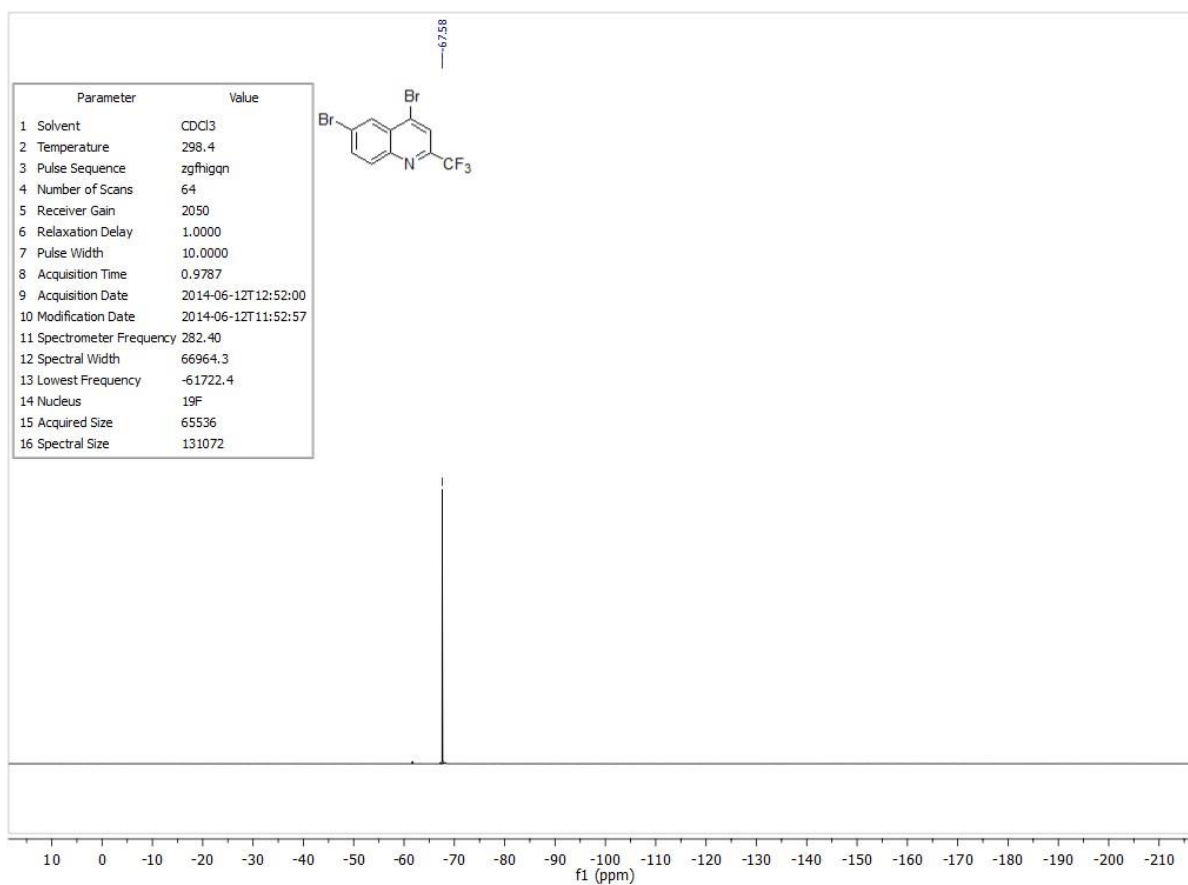

# 10 – 3,8-Dibromo-2-trifluoromethyl-4-quinolinone

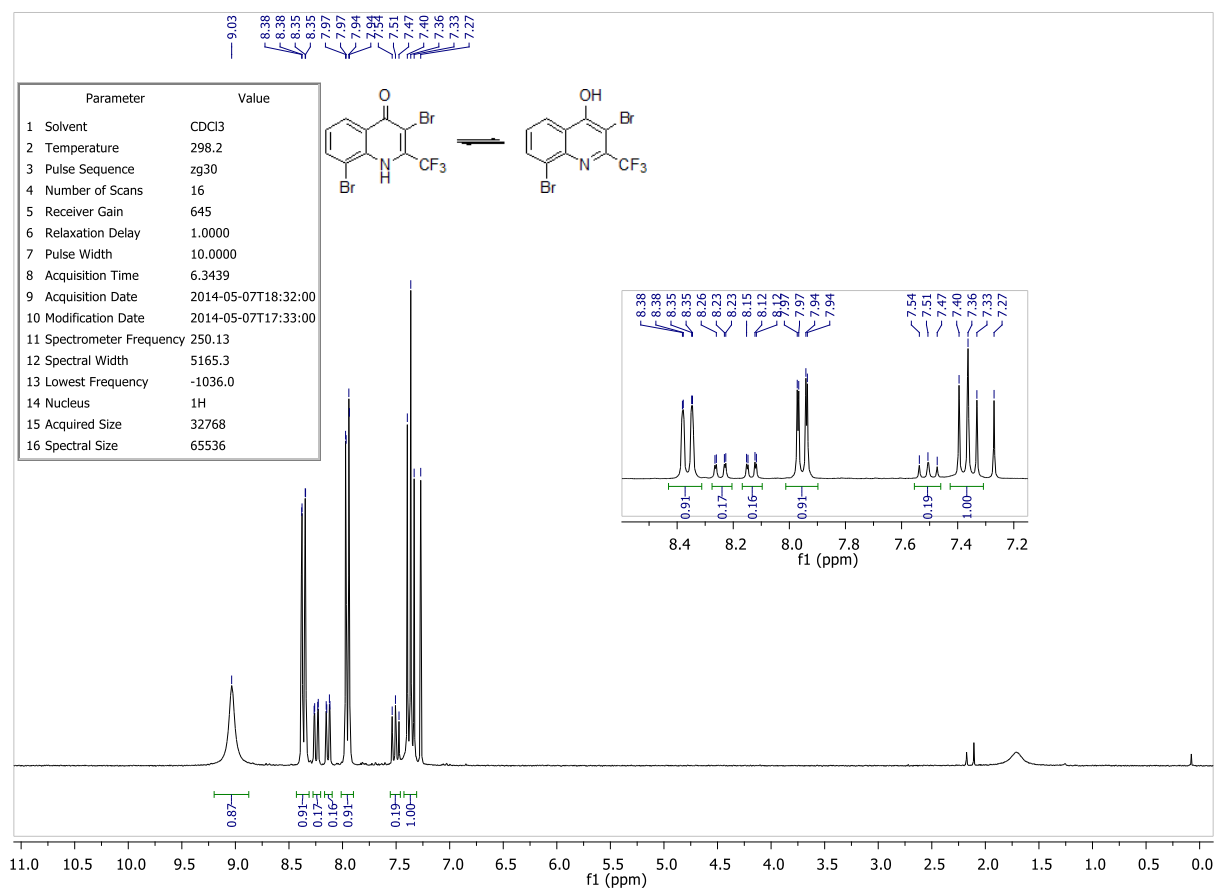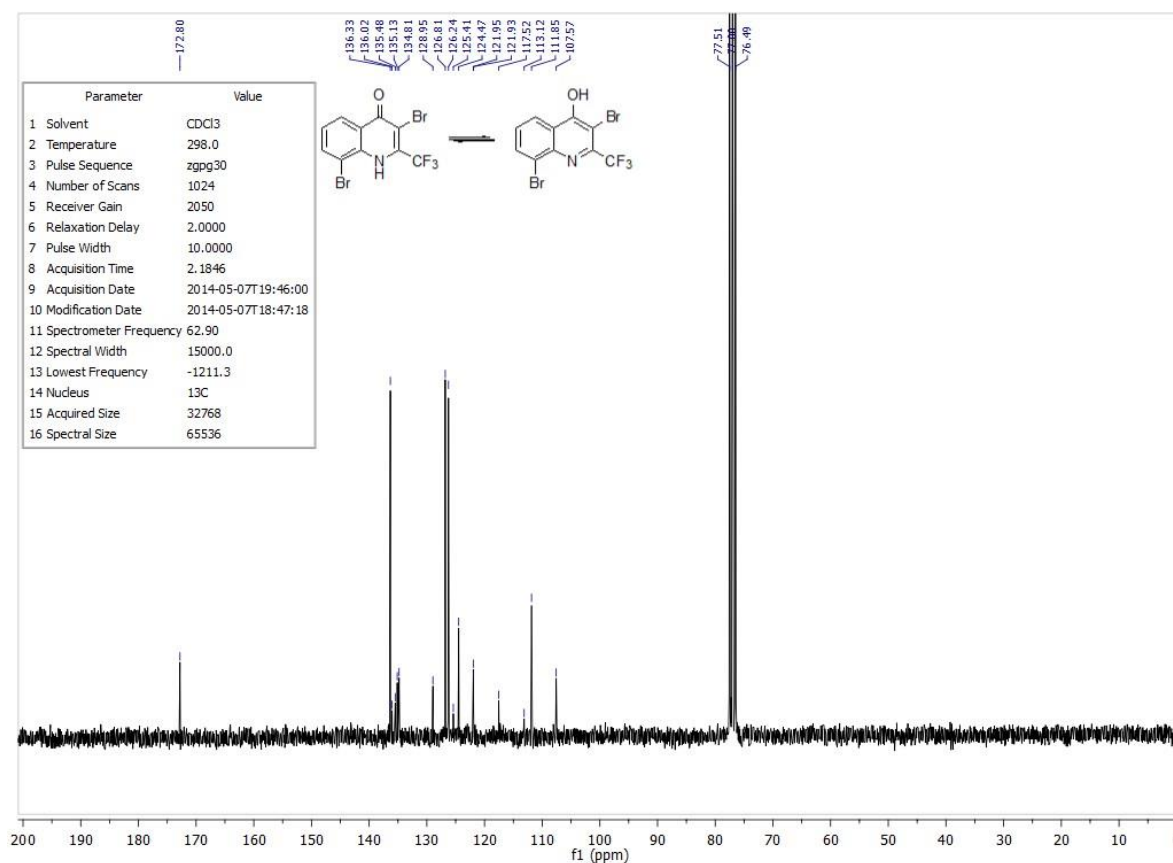

| Parameter                | Value             |
|--------------------------|-------------------|
| 1 Solvent                | CDCl <sub>3</sub> |
| 2 Temperature            | 298.0             |
| 3 Pulse Sequence         | dept135           |
| 4 Number of Scans        | 256               |
| 5 Receiver Gain          | 1290              |
| 6 Relaxation Delay       | 2.0000            |
| 7 Pulse Width            | 10.0000           |
| 8 Acquisition Time       | 2.1846            |
| 9 Spectrometer Frequency | 62.90             |
| 10 Spectral Width        | 15000.0           |
| 11 Lowest Frequency      | -1210.9           |
| 12 Nucleus               | <sup>13</sup> C   |
| 13 Acquired Size         | 32768             |
| 14 Spectral Size         | 32768             |

136.33  
135.13  
128.95  
126.81  
126.25  
121.96

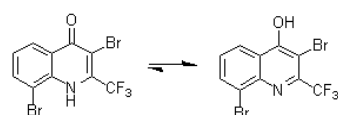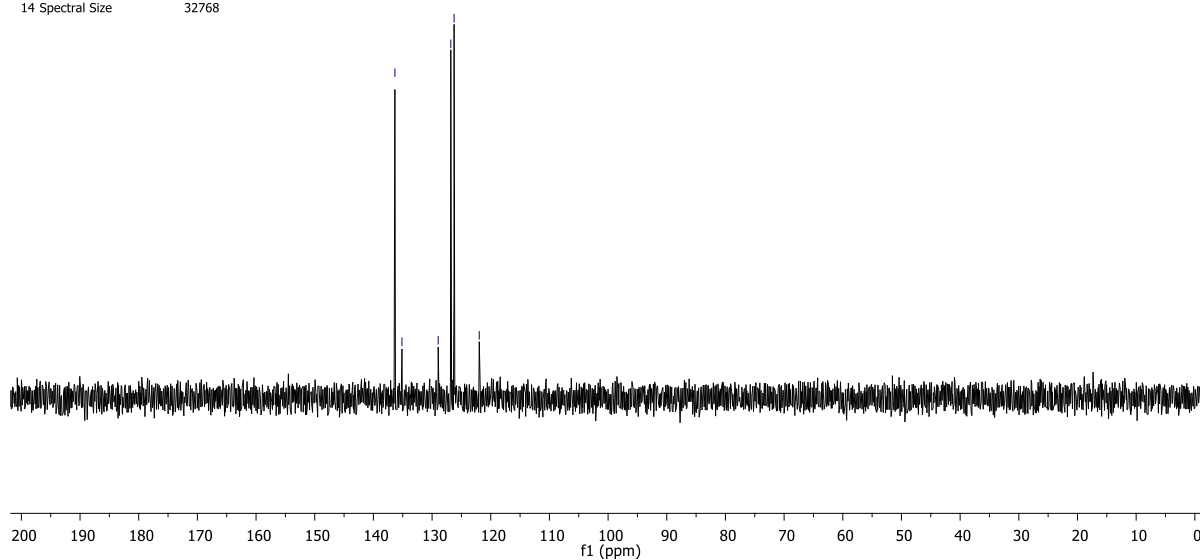

| Parameter                 | Value               |
|---------------------------|---------------------|
| 1 Solvent                 | CDCl <sub>3</sub>   |
| 2 Temperature             | 298.2               |
| 3 Pulse Sequence          | zgfhgqn             |
| 4 Number of Scans         | 64                  |
| 5 Receiver Gain           | 2050                |
| 6 Relaxation Delay        | 1.0000              |
| 7 Pulse Width             | 10.0000             |
| 8 Acquisition Time        | 0.9787              |
| 9 Acquisition Date        | 2014-05-08T10:17:00 |
| 10 Modification Date      | 2014-05-08T09:17:53 |
| 11 Spectrometer Frequency | 282.40              |
| 12 Spectral Width         | 66964.3             |
| 13 Lowest Frequency       | -61722.4            |
| 14 Nucleus                | <sup>19</sup> F     |
| 15 Acquired Size          | 65536               |
| 16 Spectral Size          | 131072              |

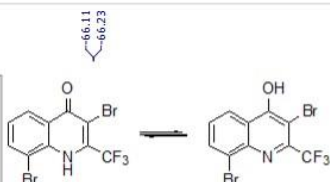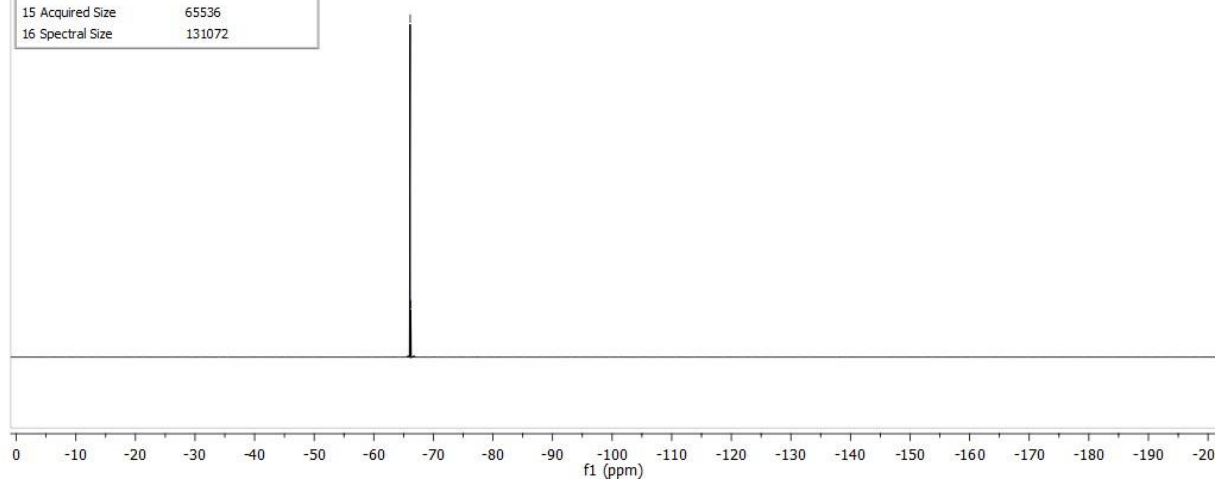

# 11 - 3,4,8-Tribromo-2-trifluoromethylquinoline

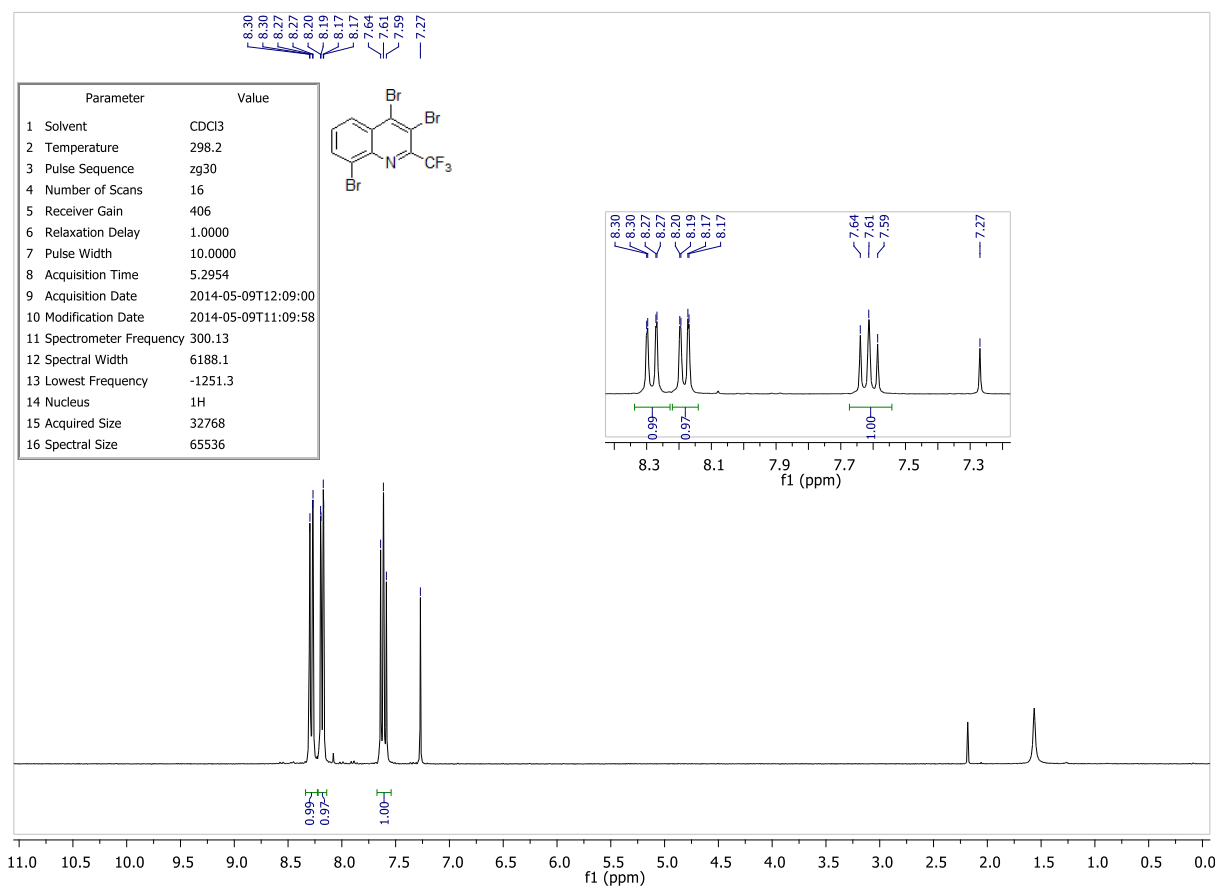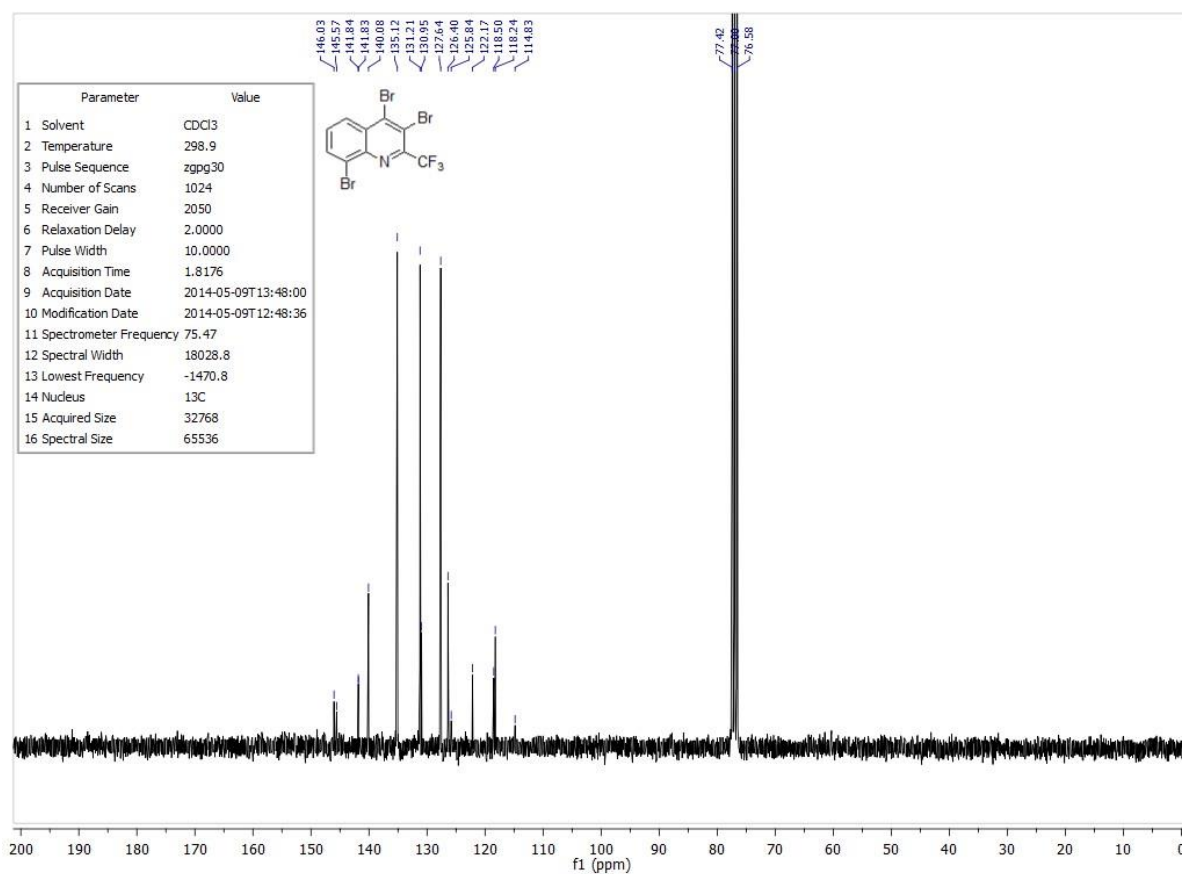

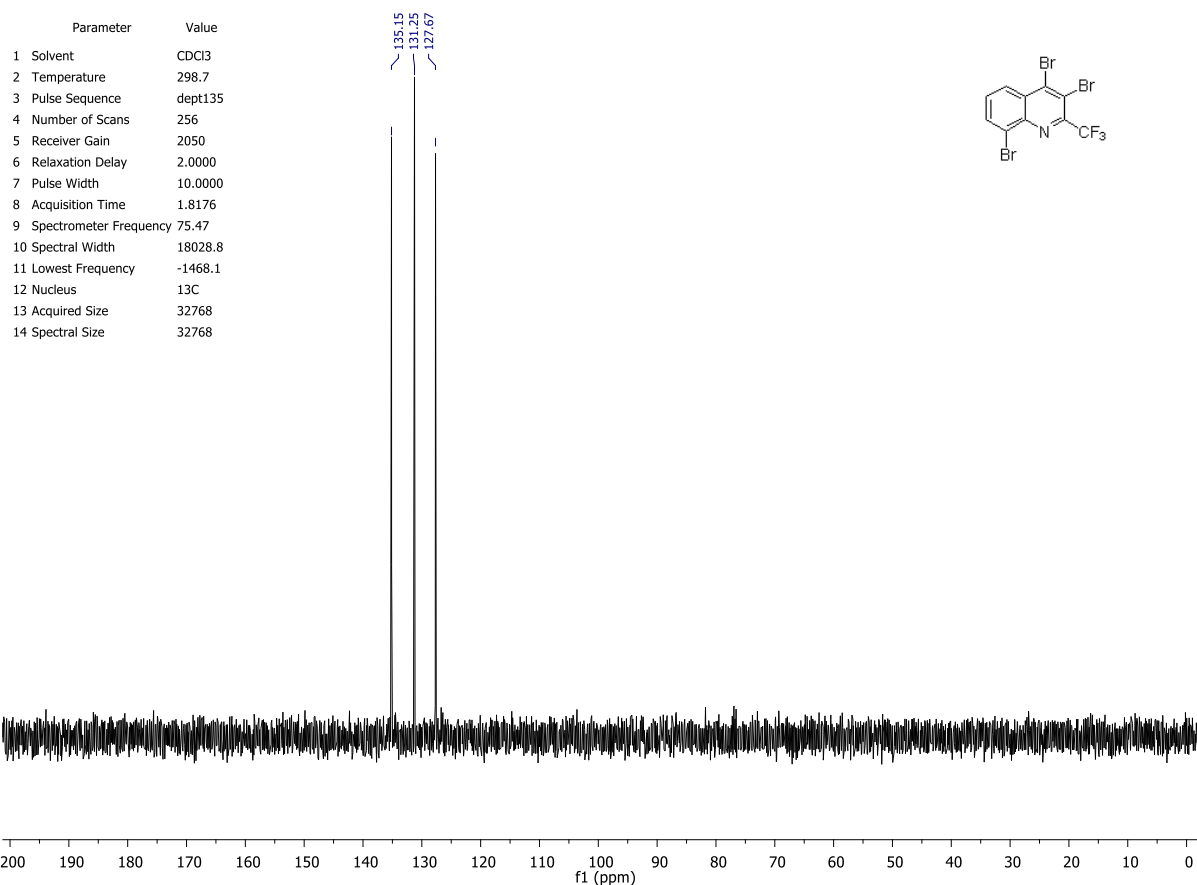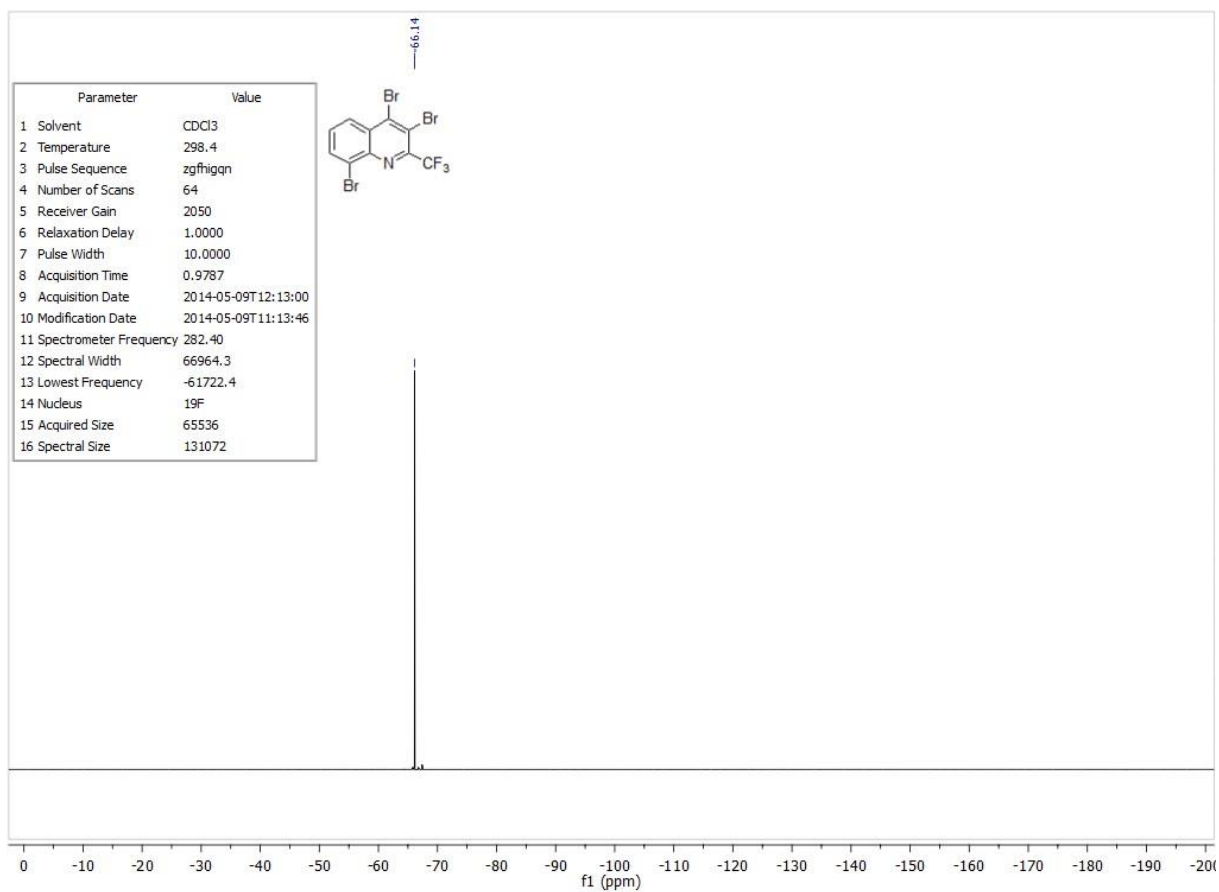



# 6a - 4,8-Bis(phenylethynyl)-2-trifluoromethylquinoline

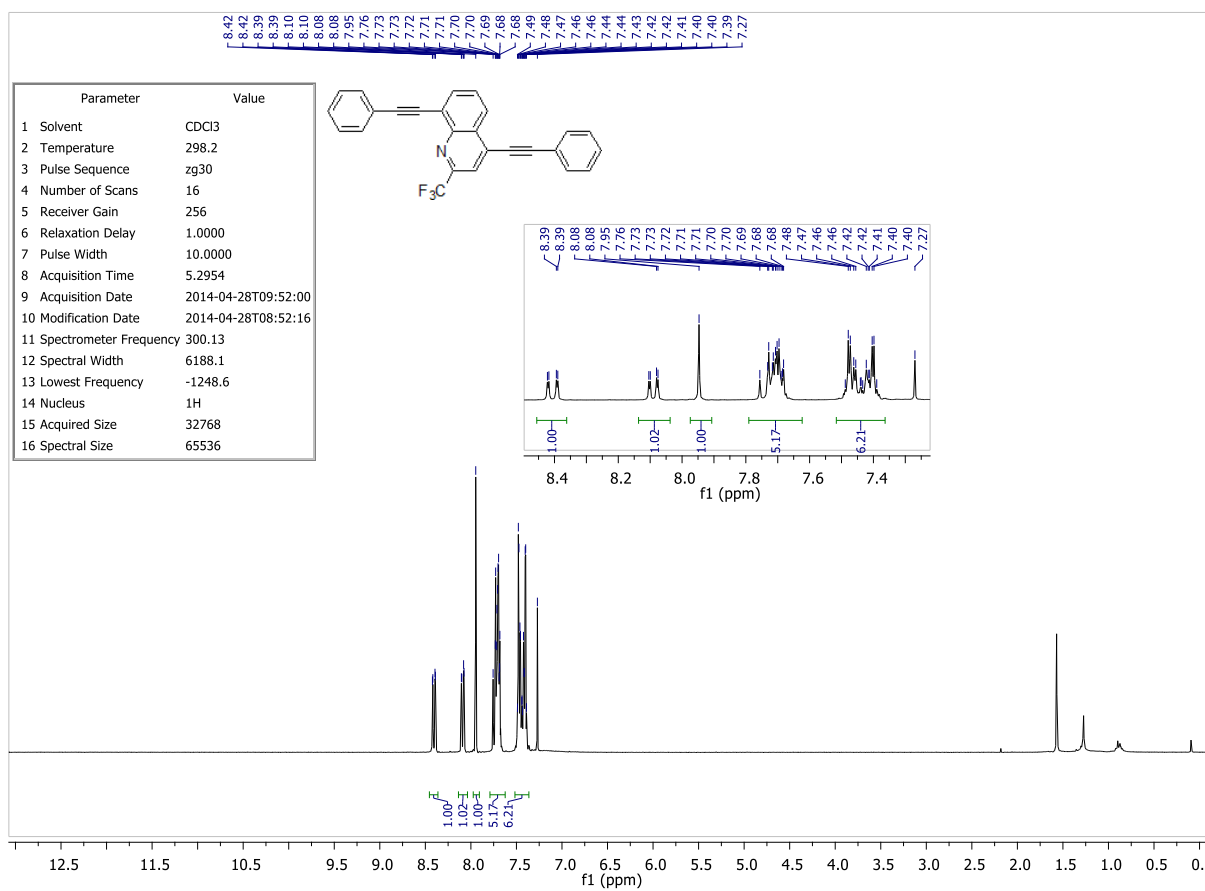

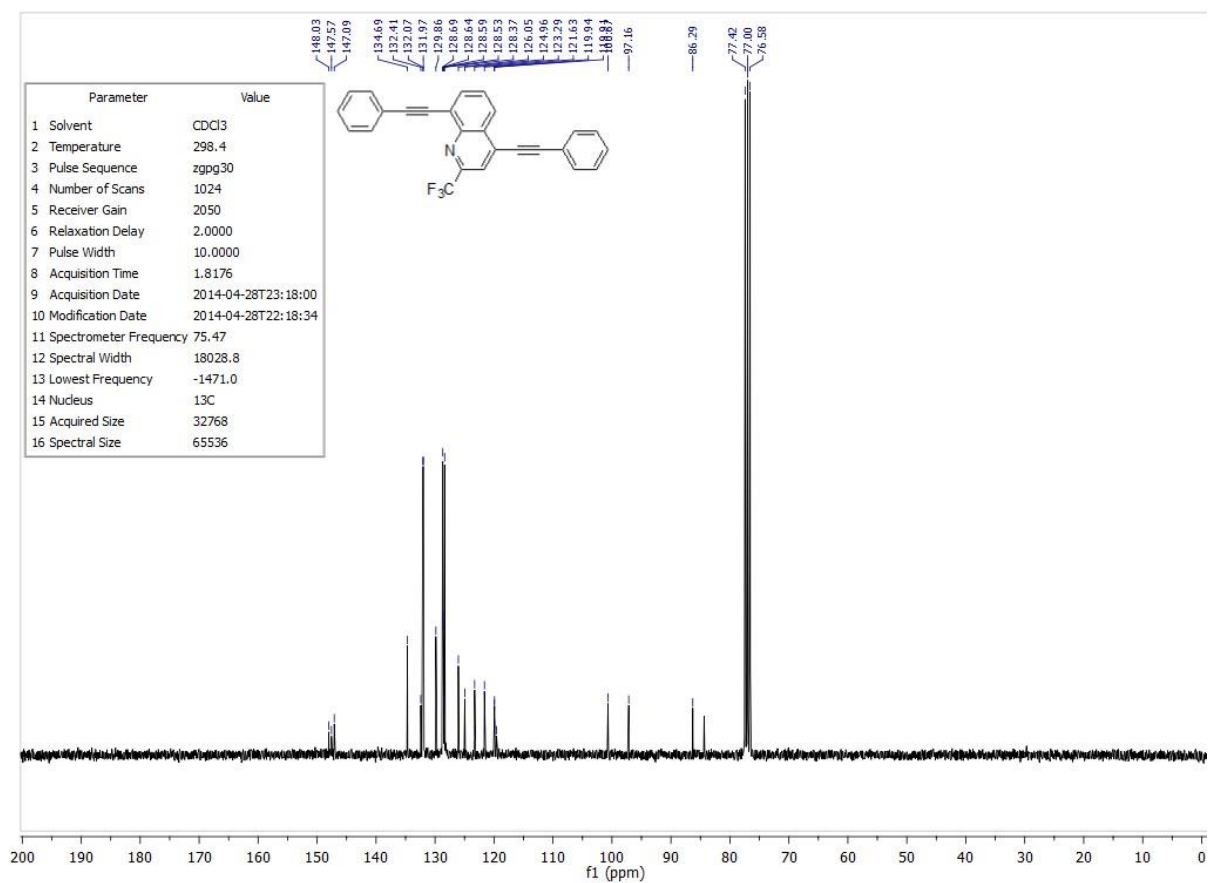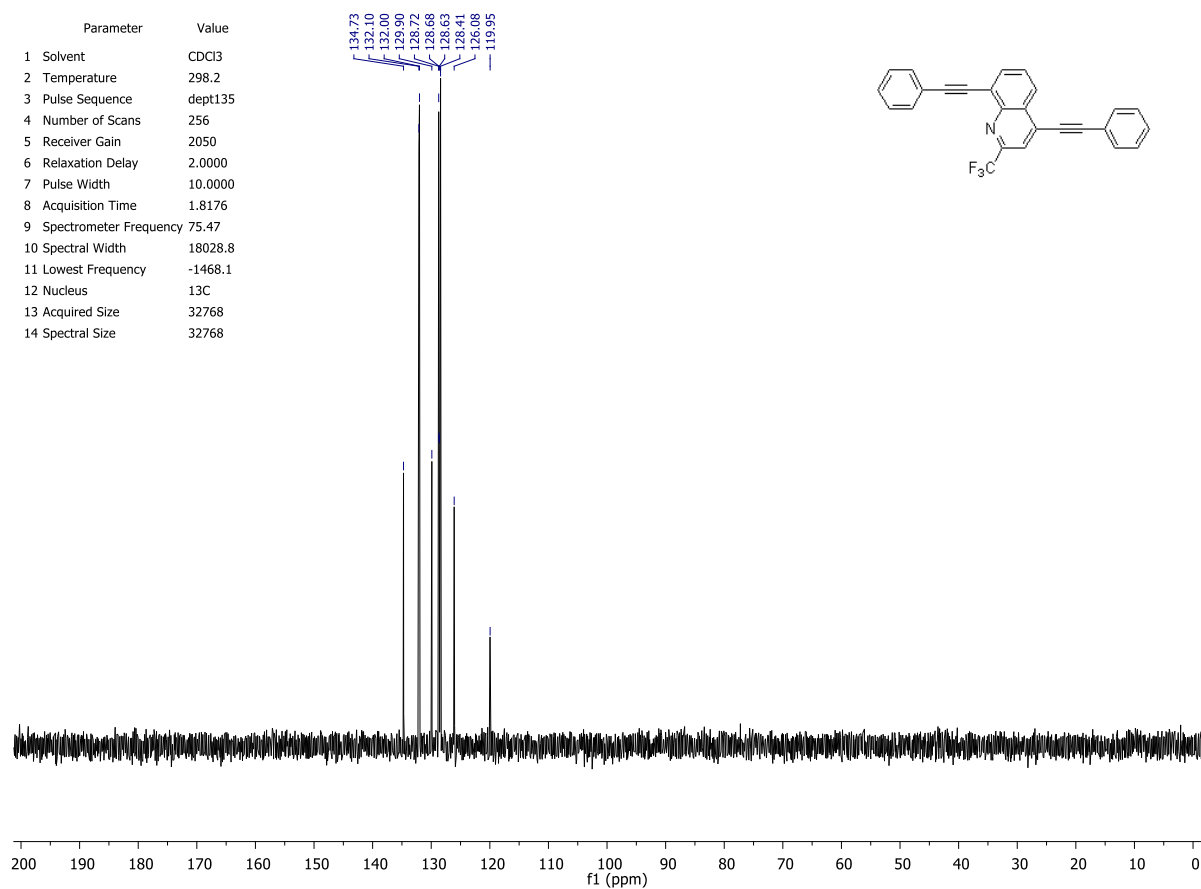

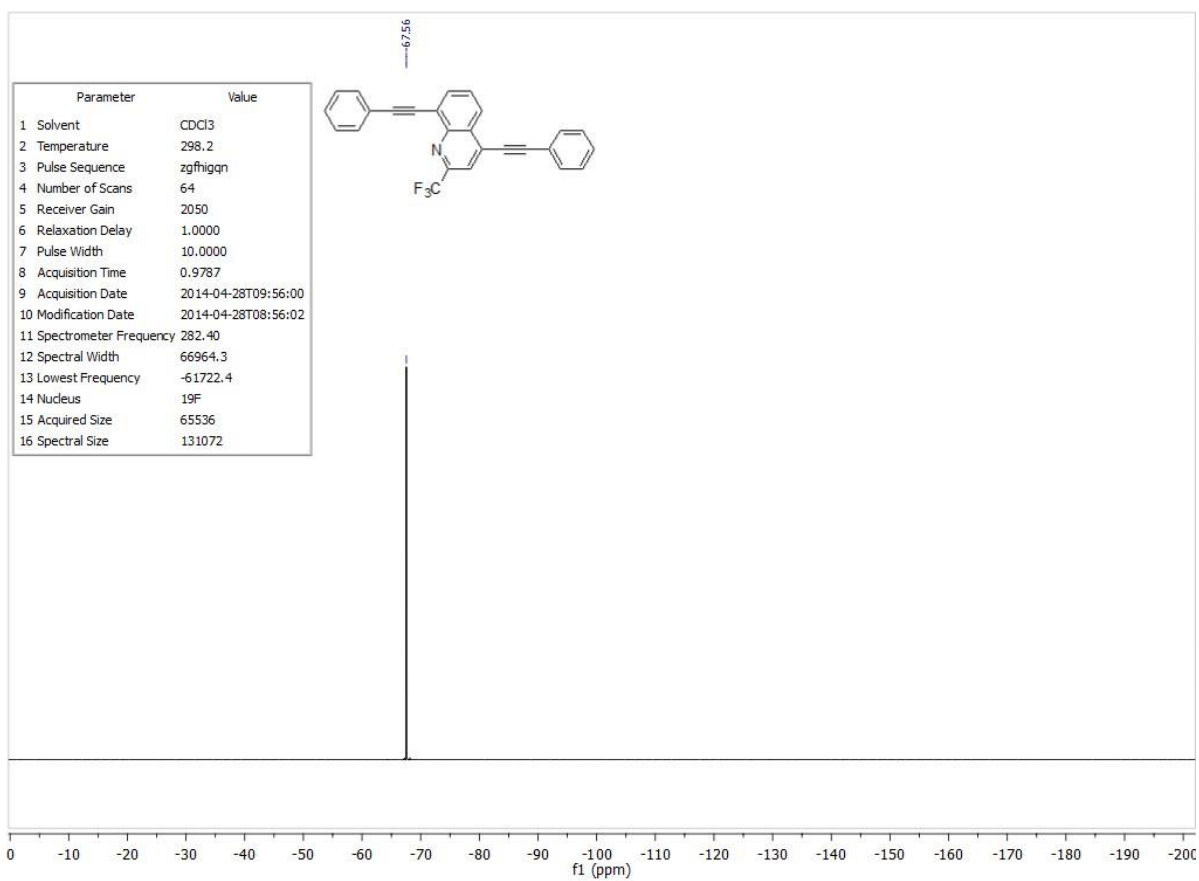

# 6b - 4,8-Bis(4'-tert-butylphenylethynyl)-2-trifluoromethylquinoline

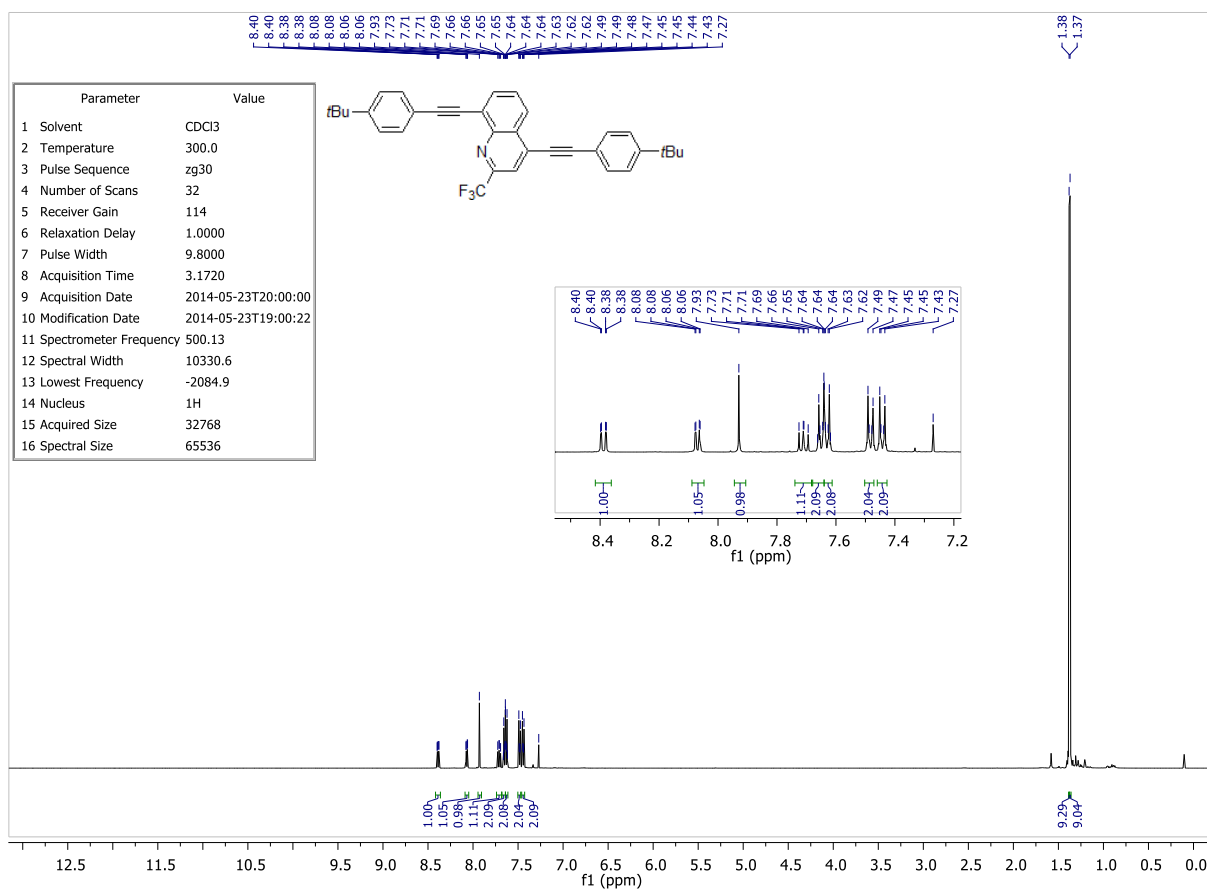

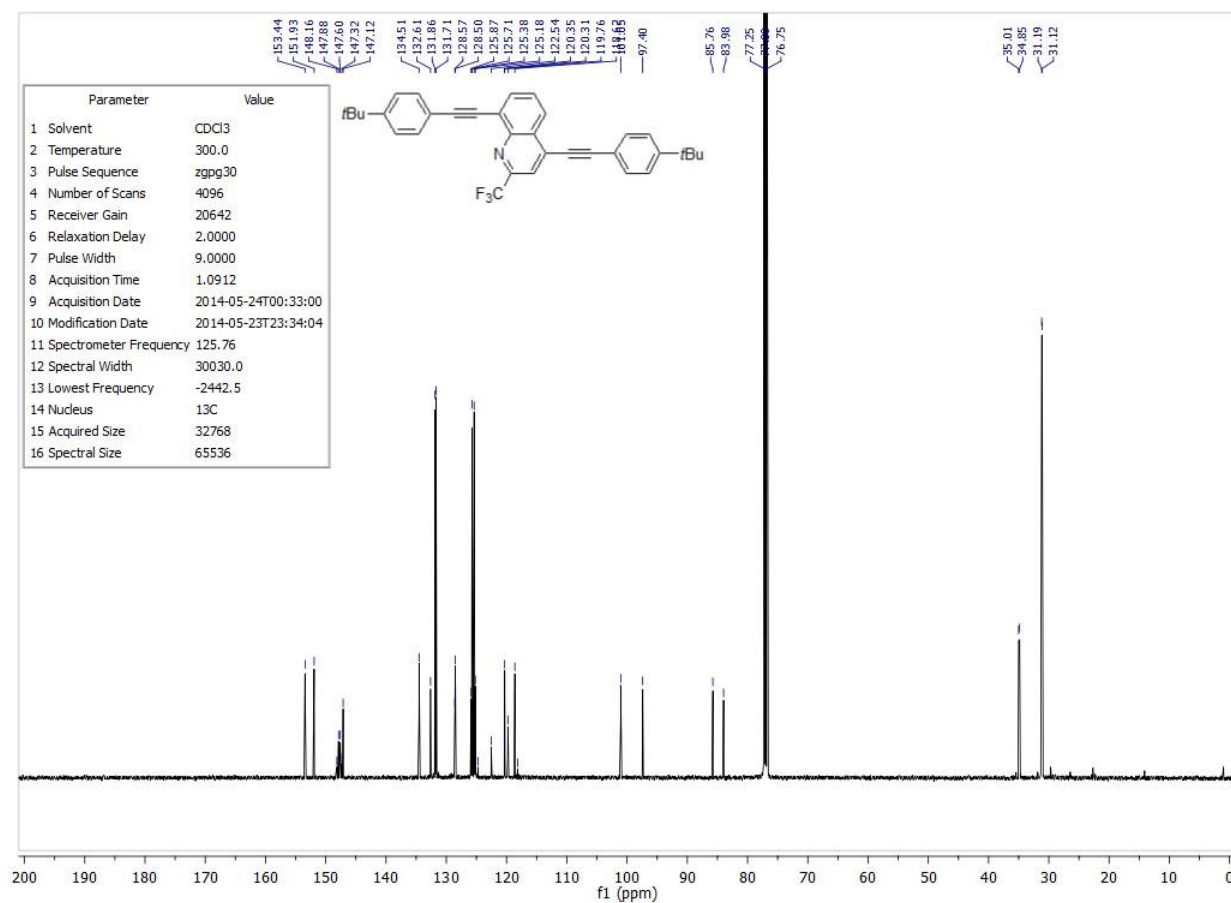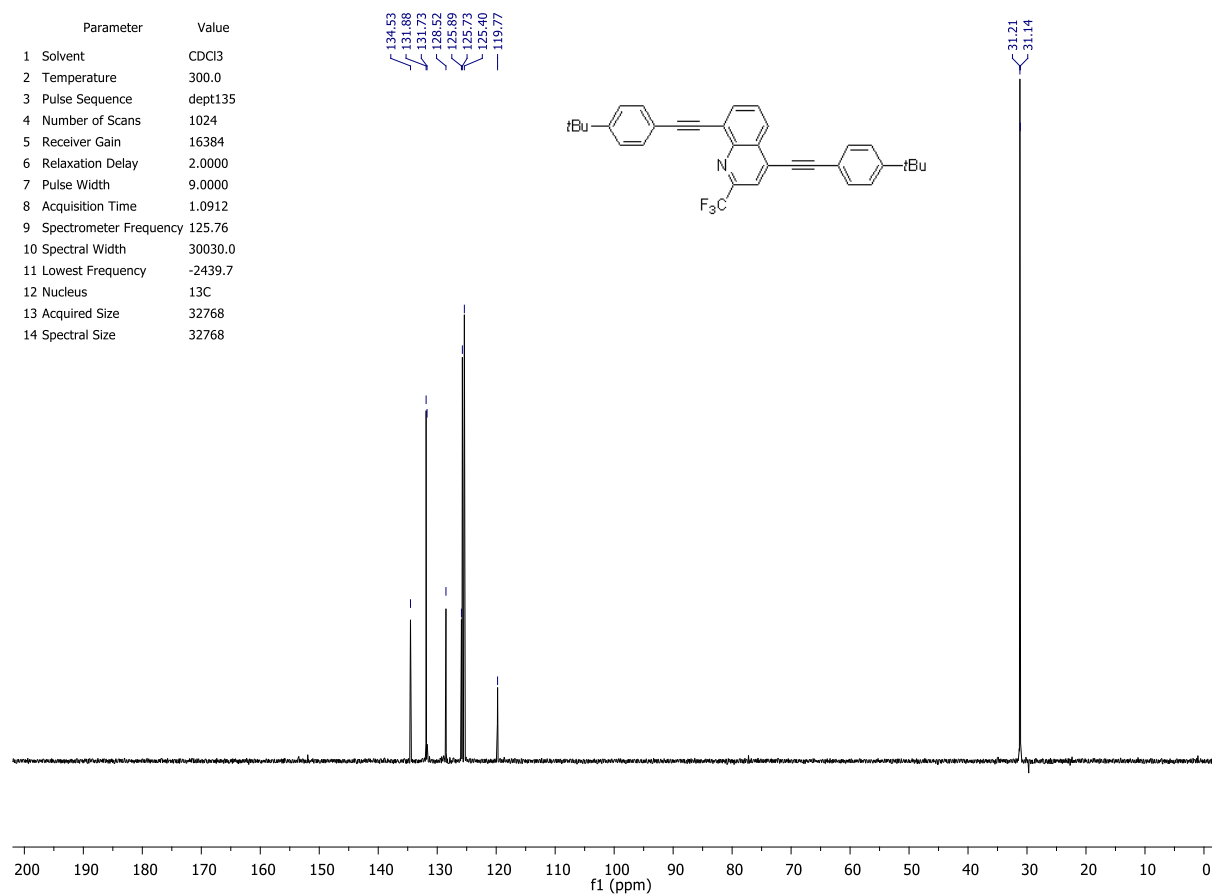

| Parameter                 | Value               |
|---------------------------|---------------------|
| 1 Solvent                 | CDCl <sub>3</sub>   |
| 2 Temperature             | 298.4               |
| 3 Pulse Sequence          | zgfhigqn            |
| 4 Number of Scans         | 64                  |
| 5 Receiver Gain           | 2050                |
| 6 Relaxation Delay        | 1.0000              |
| 7 Pulse Width             | 10.0000             |
| 8 Acquisition Time        | 0.9787              |
| 9 Acquisition Date        | 2014-05-26T10:14:00 |
| 10 Modification Date      | 2014-05-26T09:14:39 |
| 11 Spectrometer Frequency | 282.40              |
| 12 Spectral Width         | 66964.3             |
| 13 Lowest Frequency       | -61722.4            |
| 14 Nucleus                | <sup>19</sup> F     |
| 15 Acquired Size          | 65536               |
| 16 Spectral Size          | 131072              |

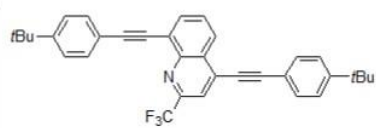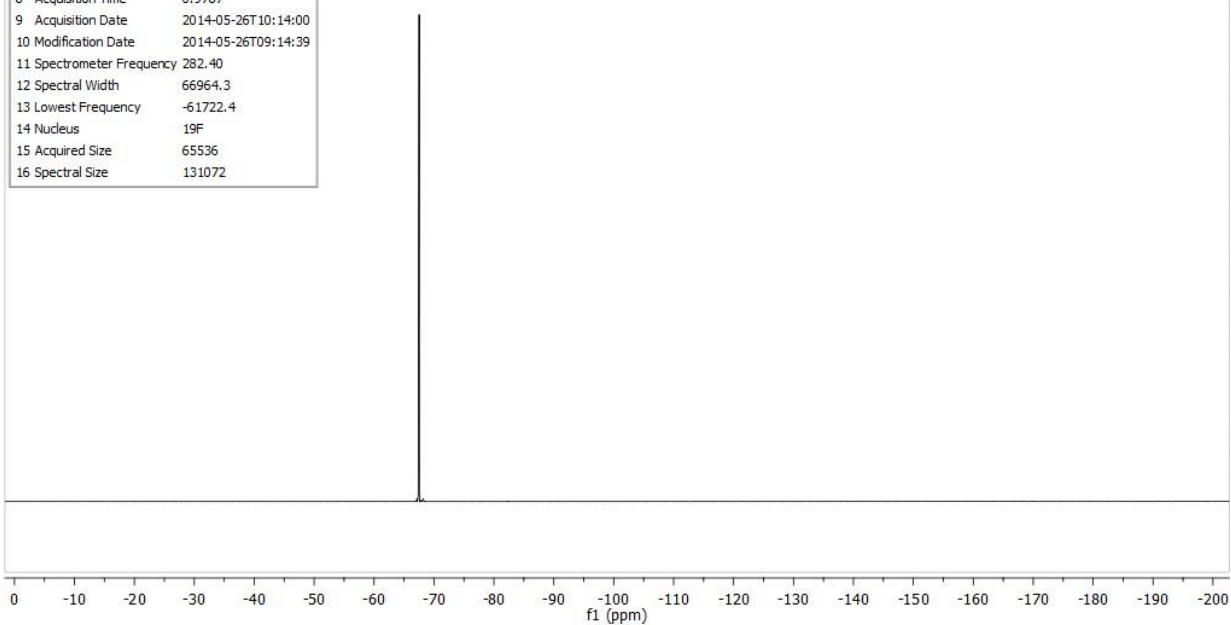

# 6d - 4,8-Bis(4'-fluorophenylethynyl)-2-trifluoromethylquinoline

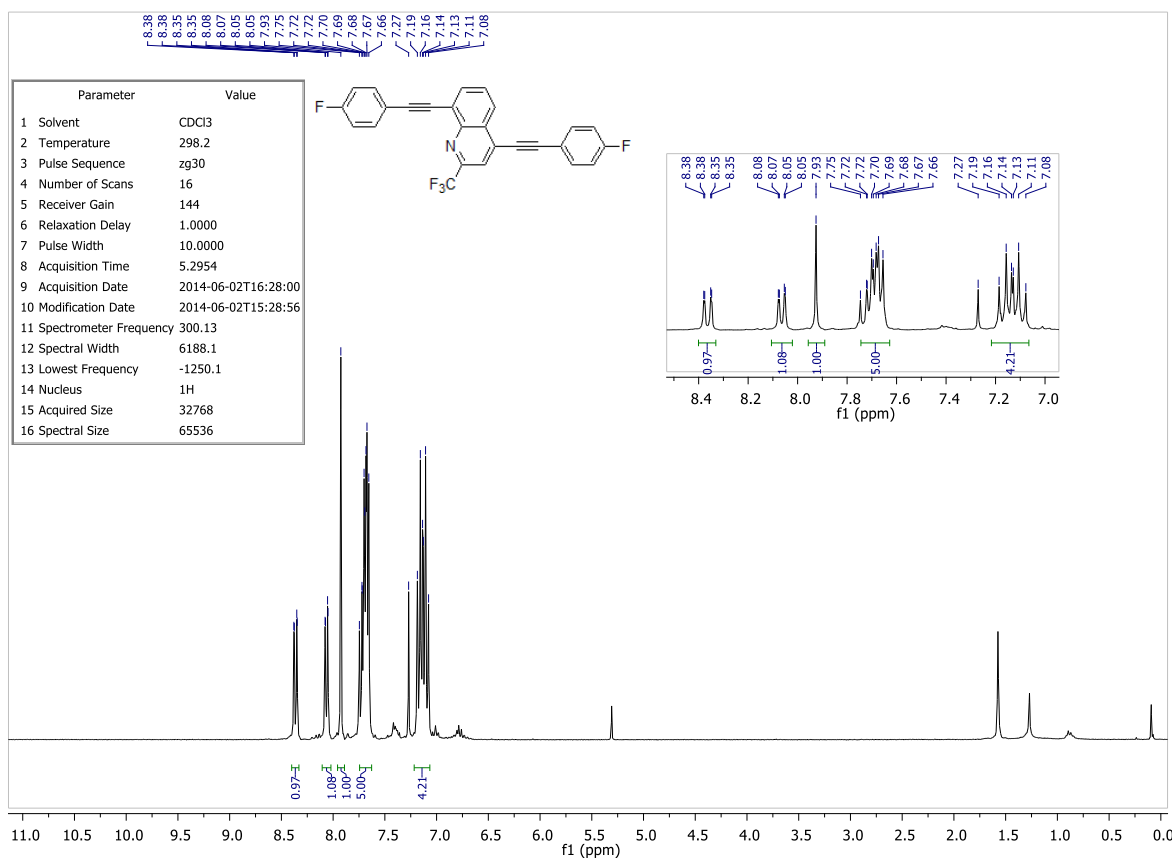

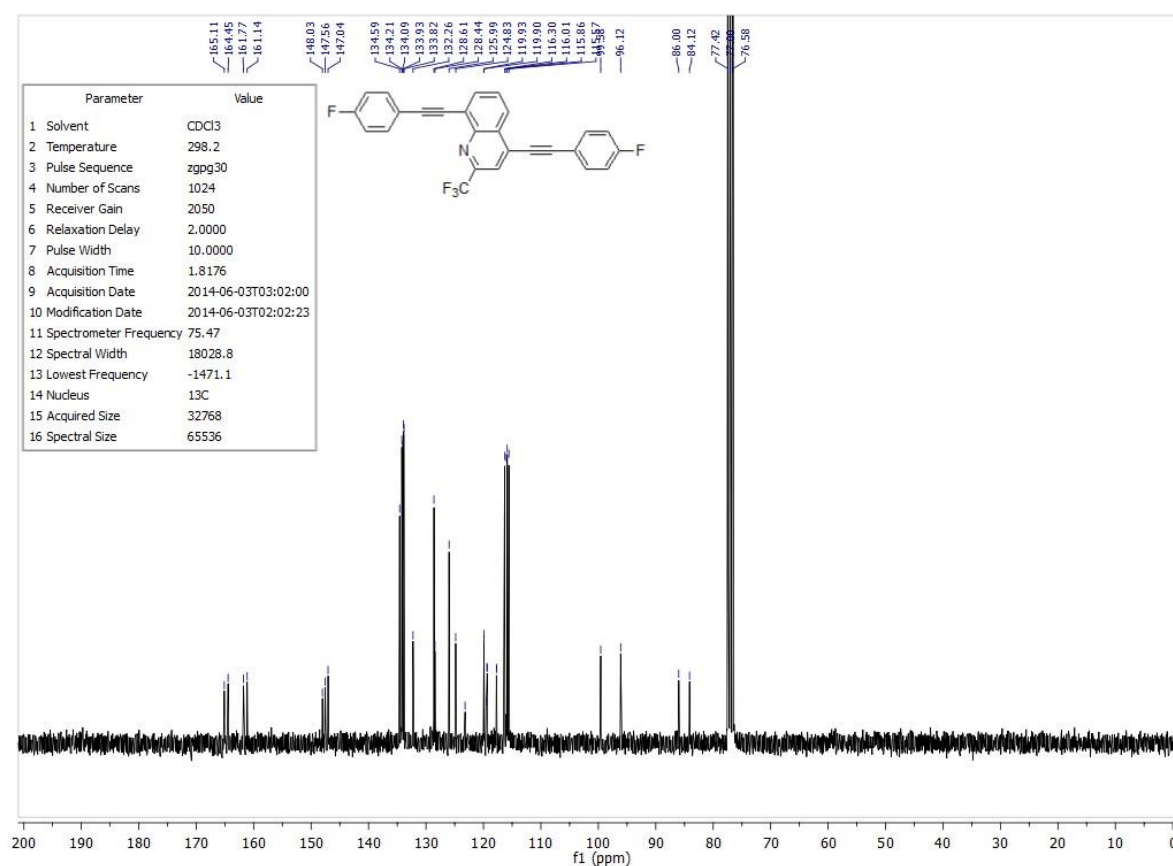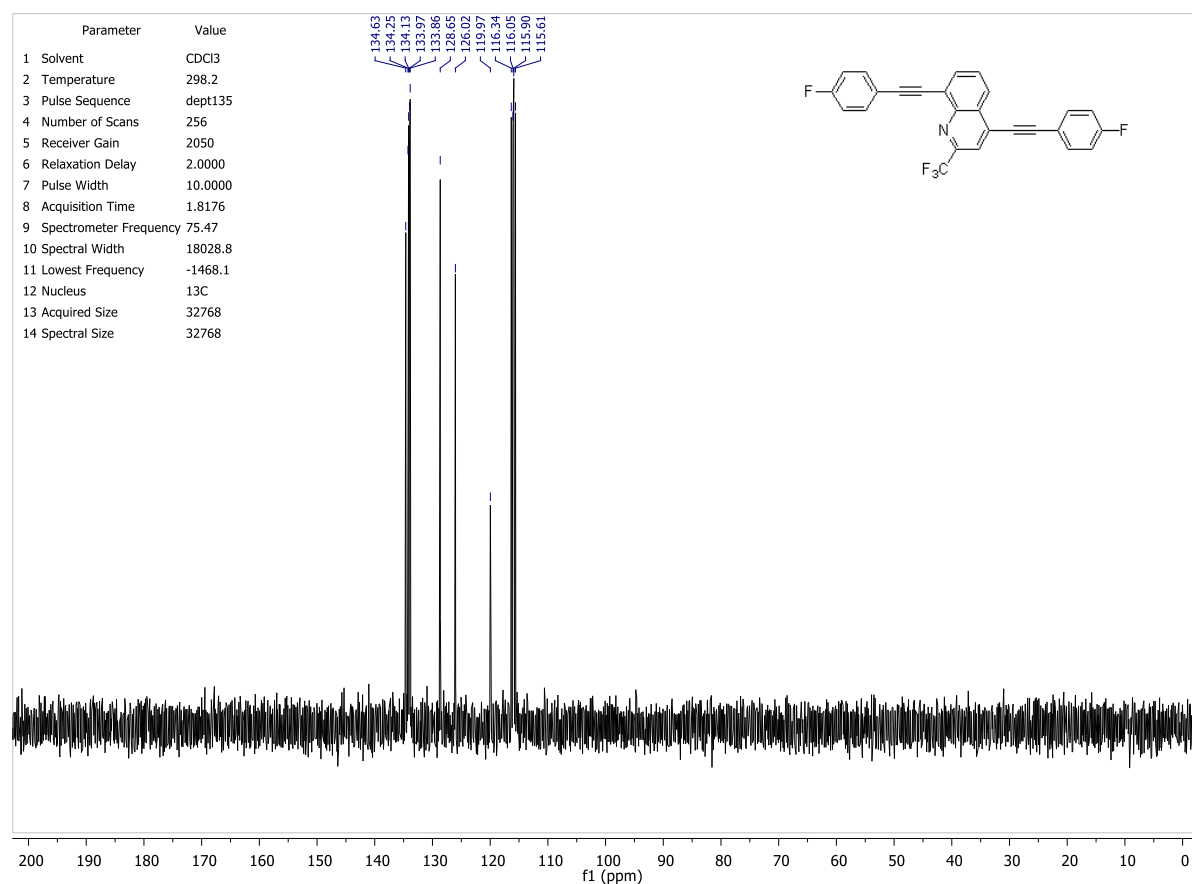



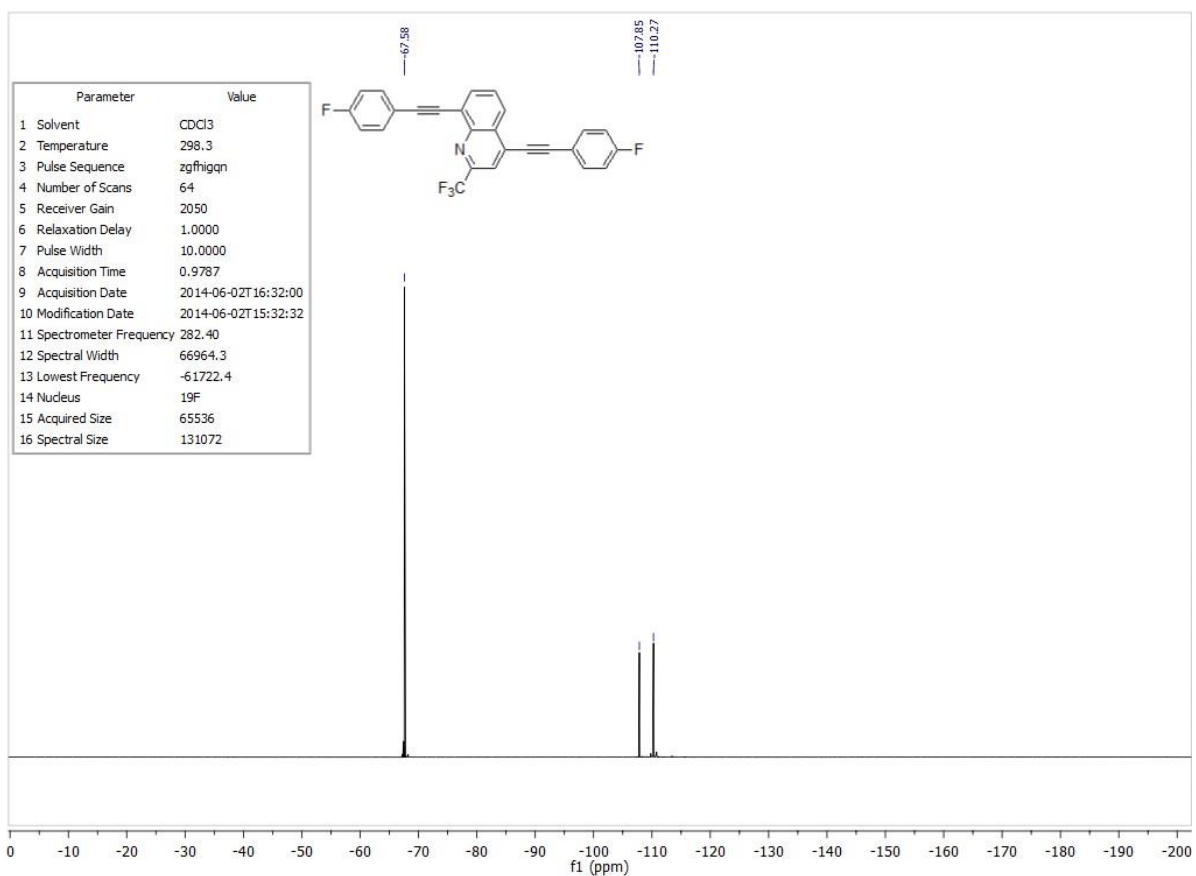

# 6e - 4,8-Bis(4'-methoxyphenylethynyl)-2-trifluoromethylquinoline

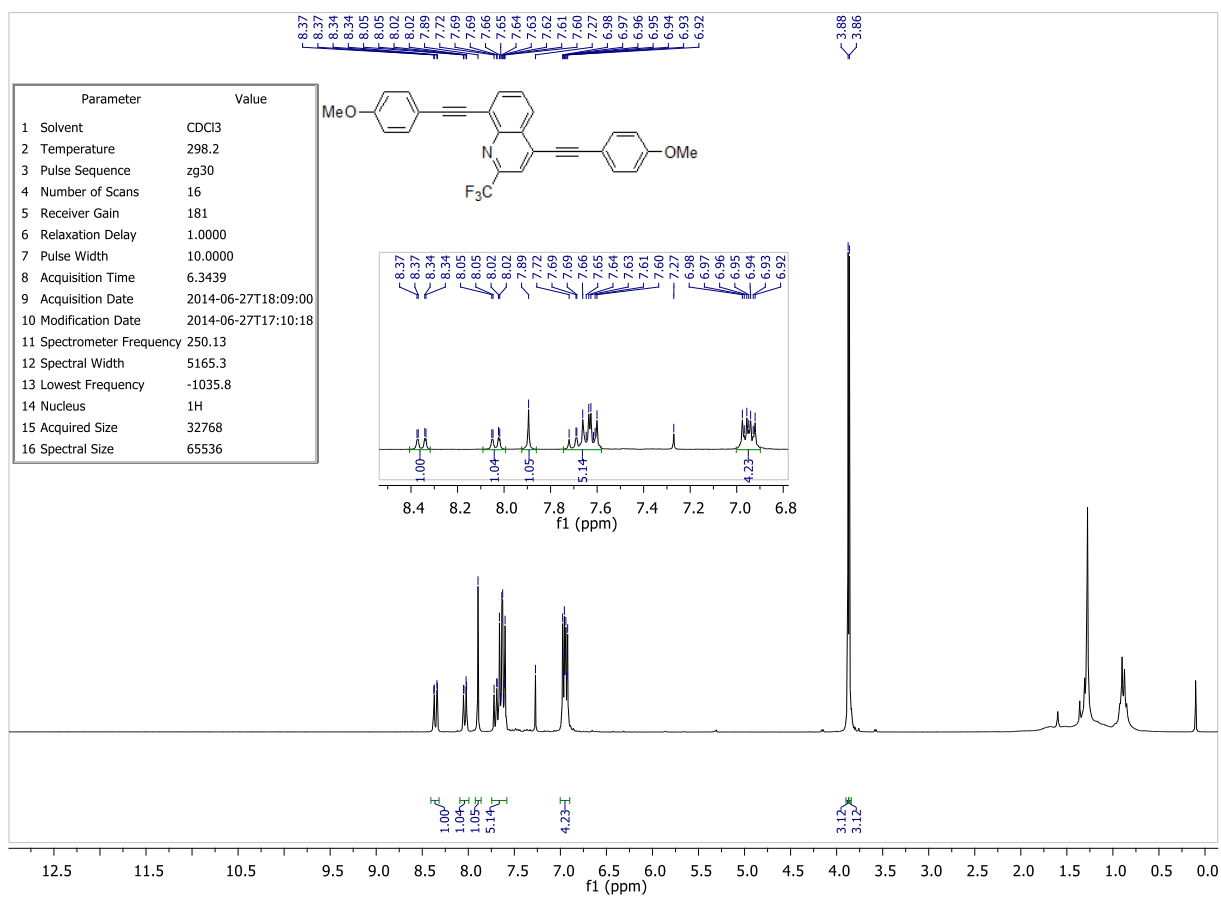

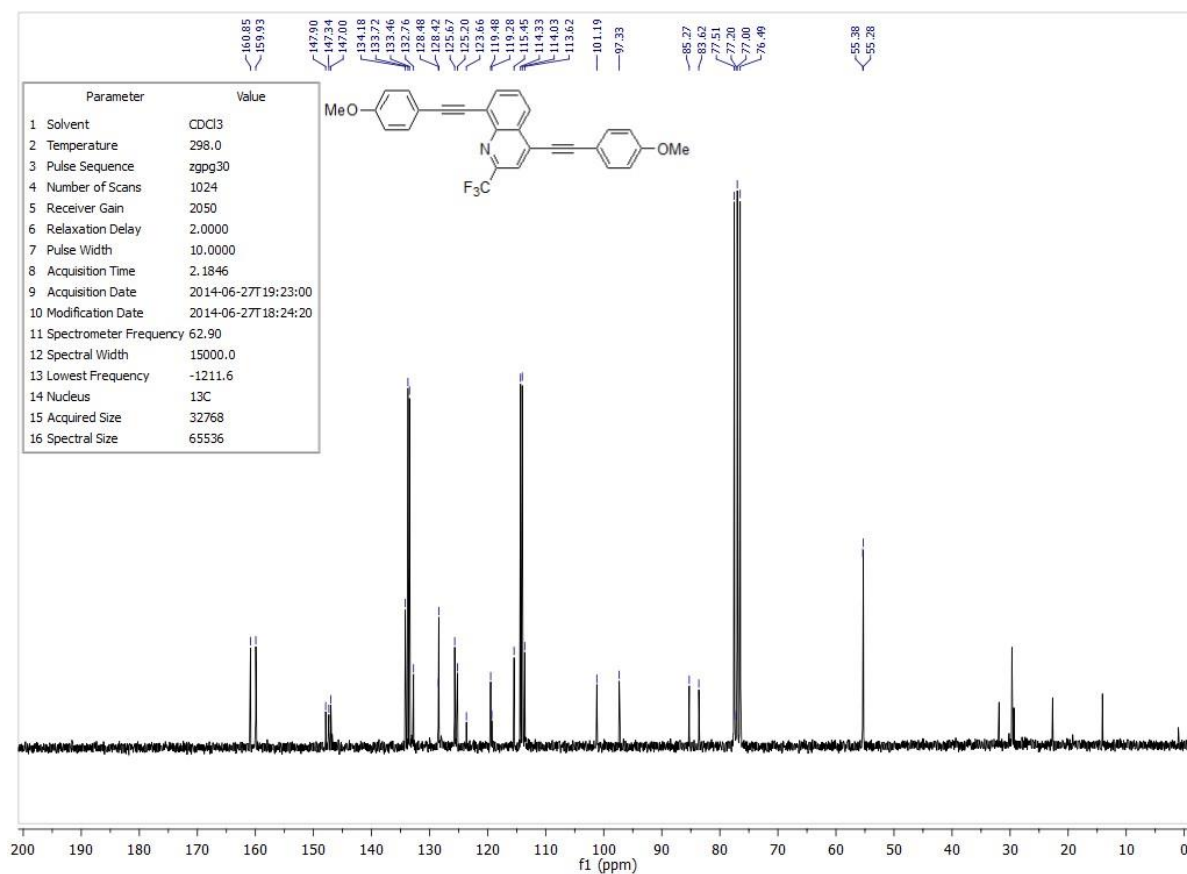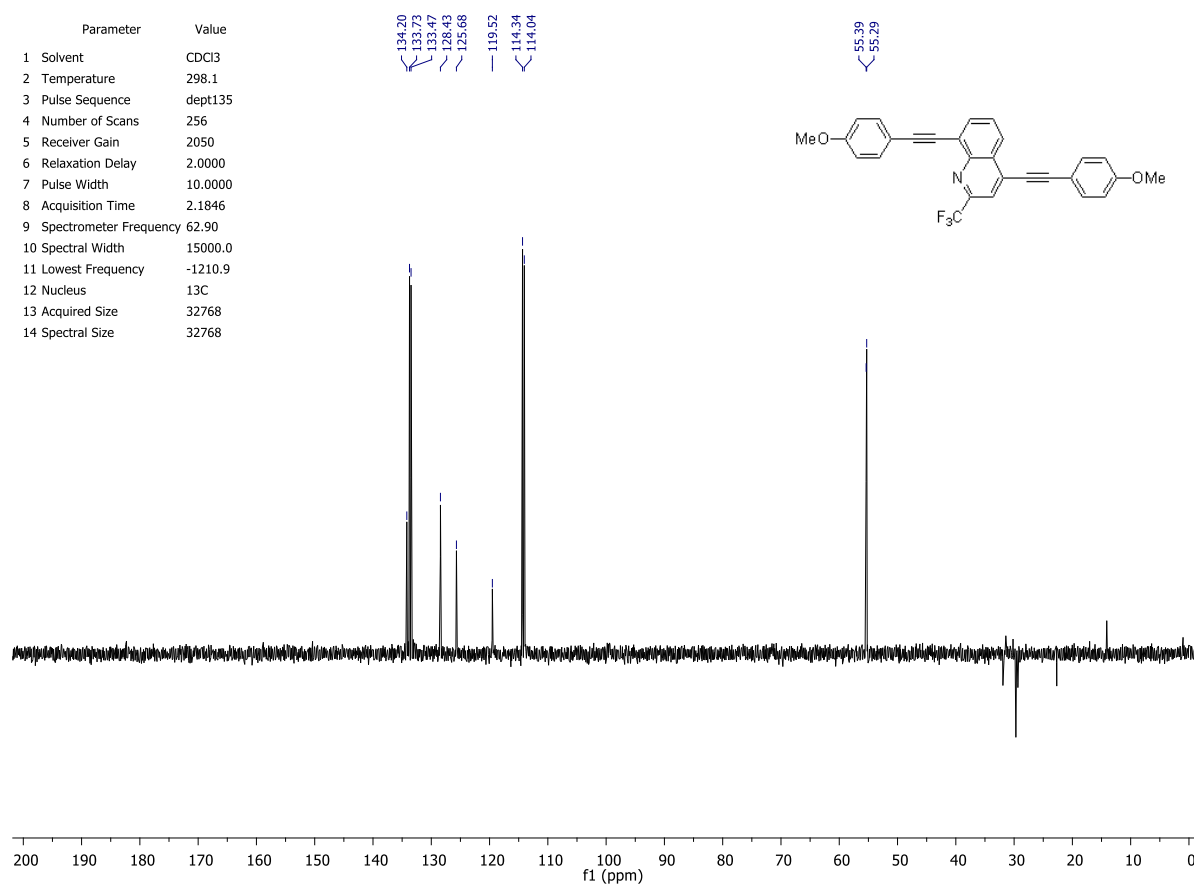

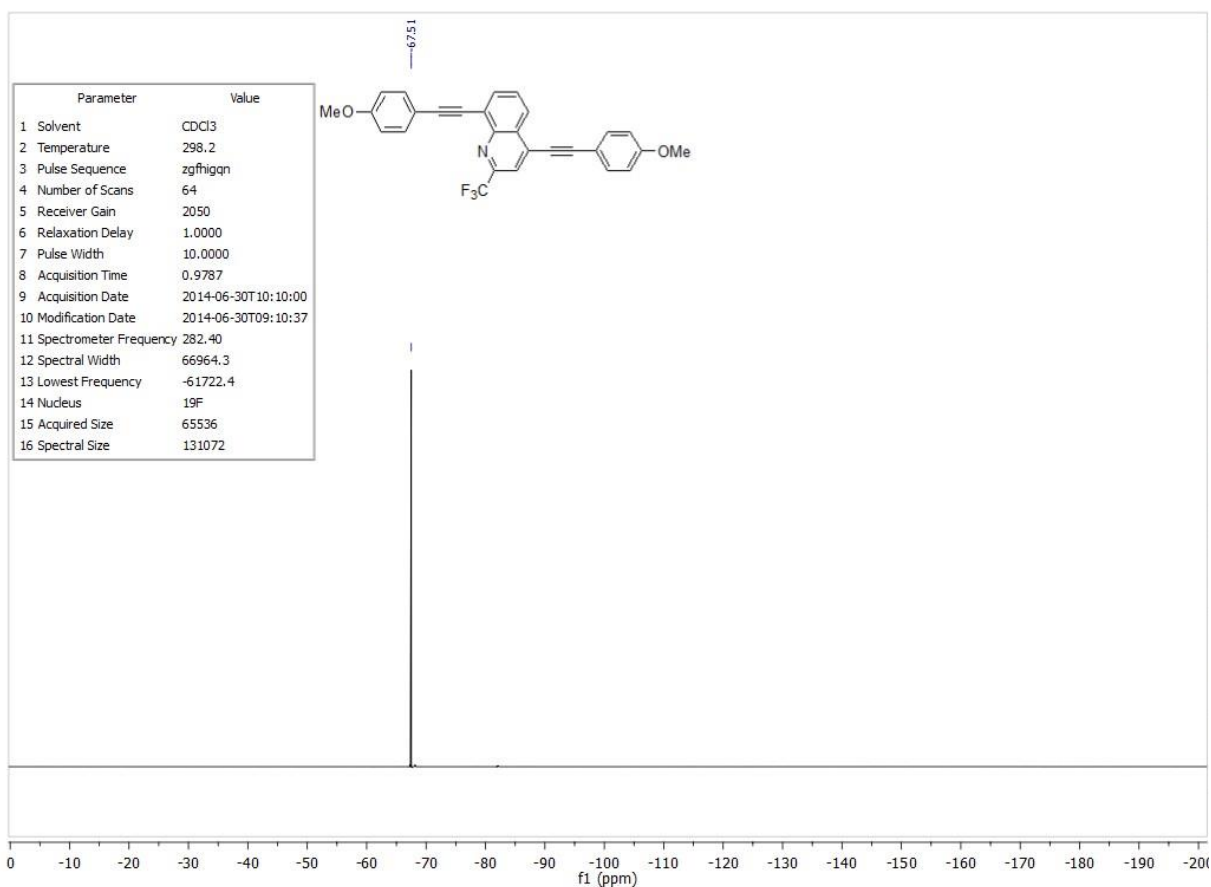

**6f** - 4,8-Bis(3'-thienylethynyl)-2-trifluoromethylquinoline

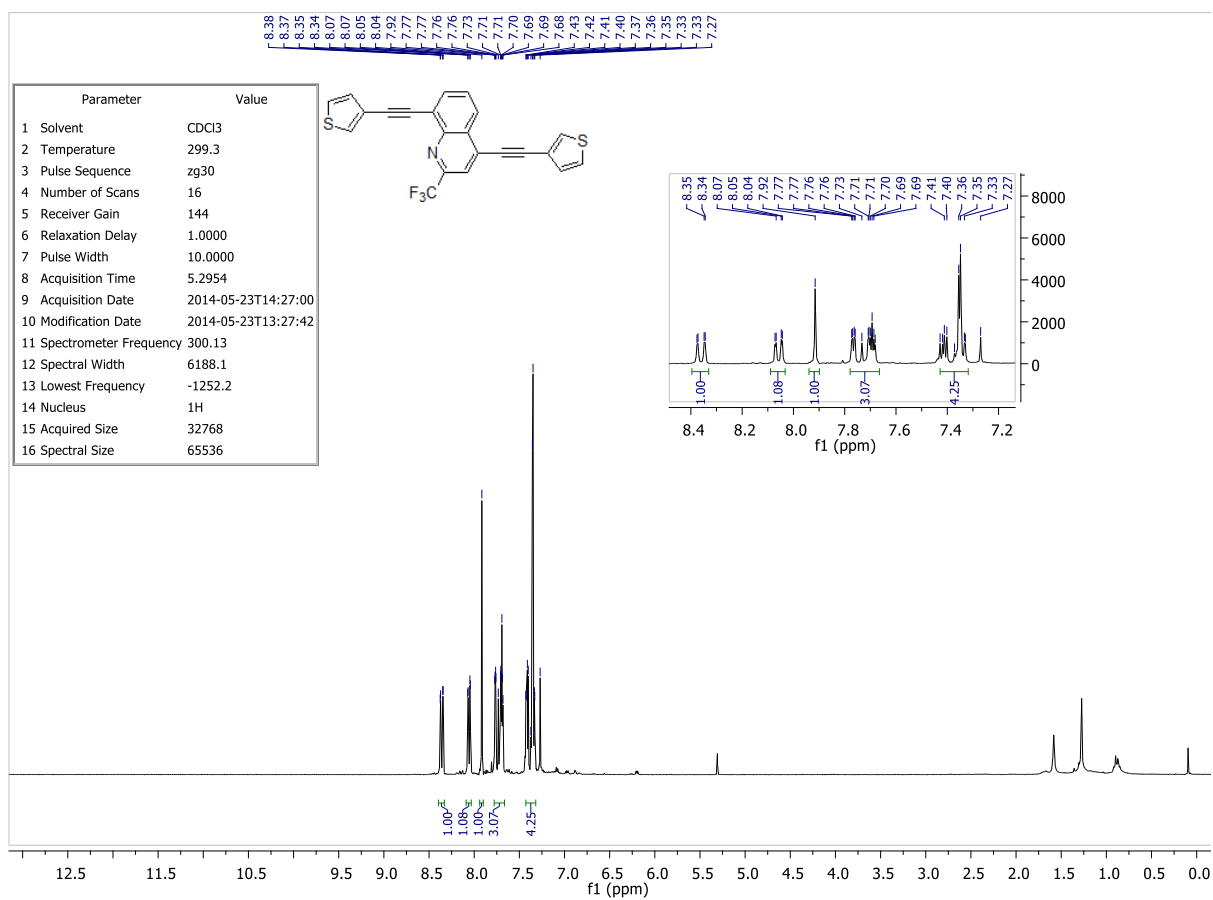

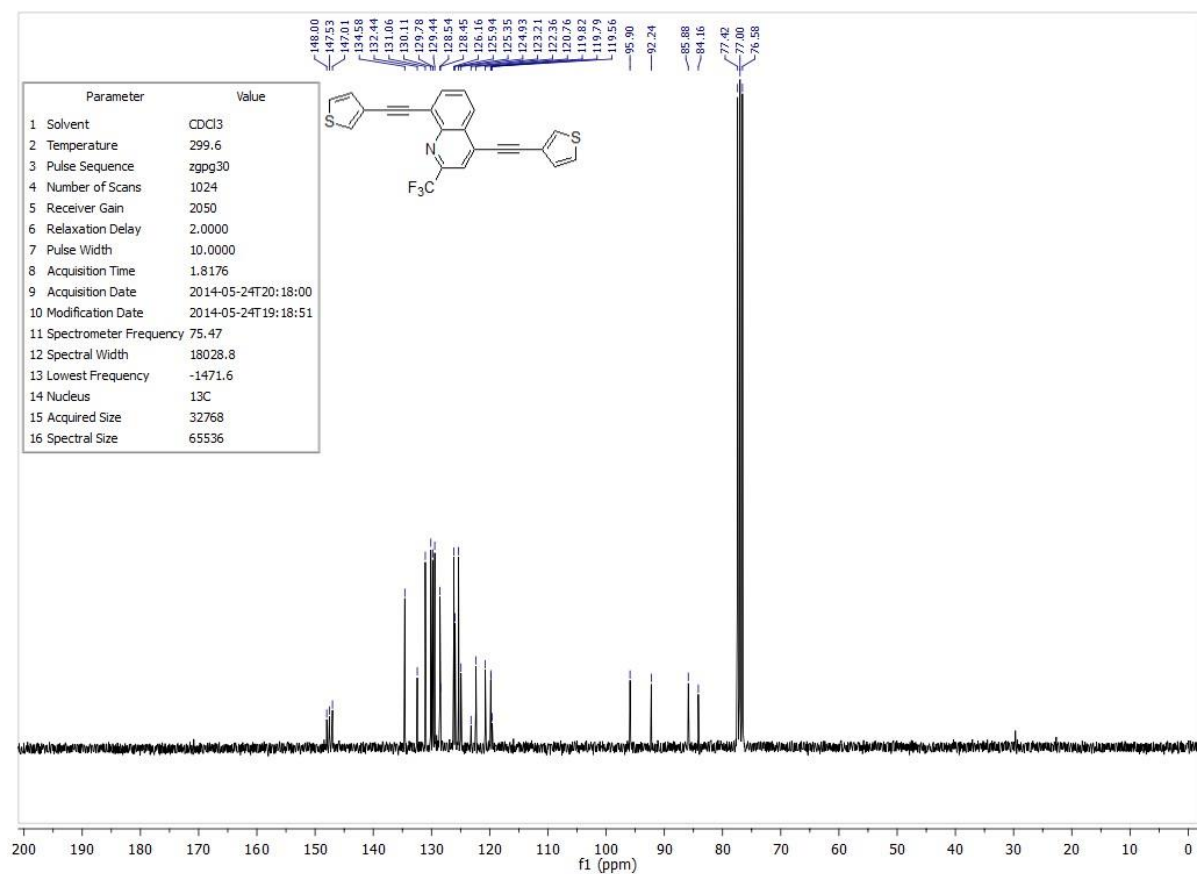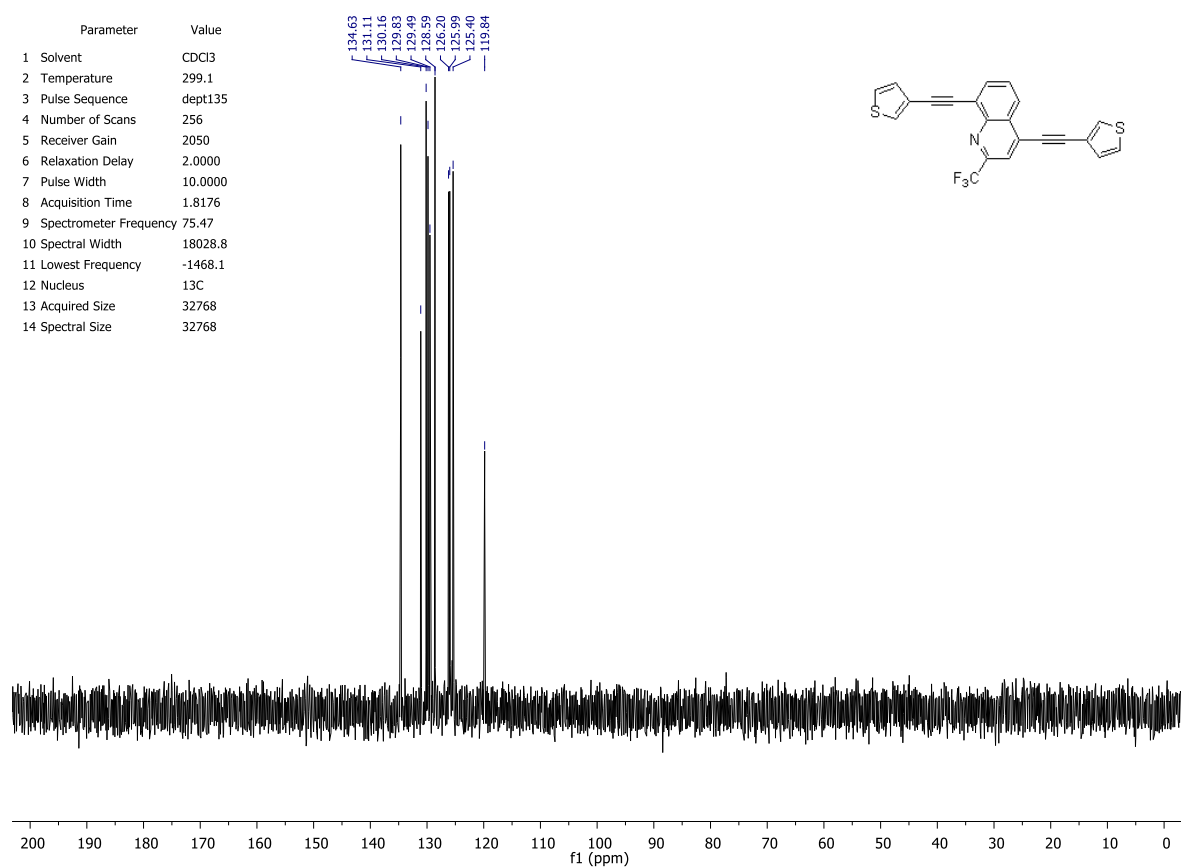

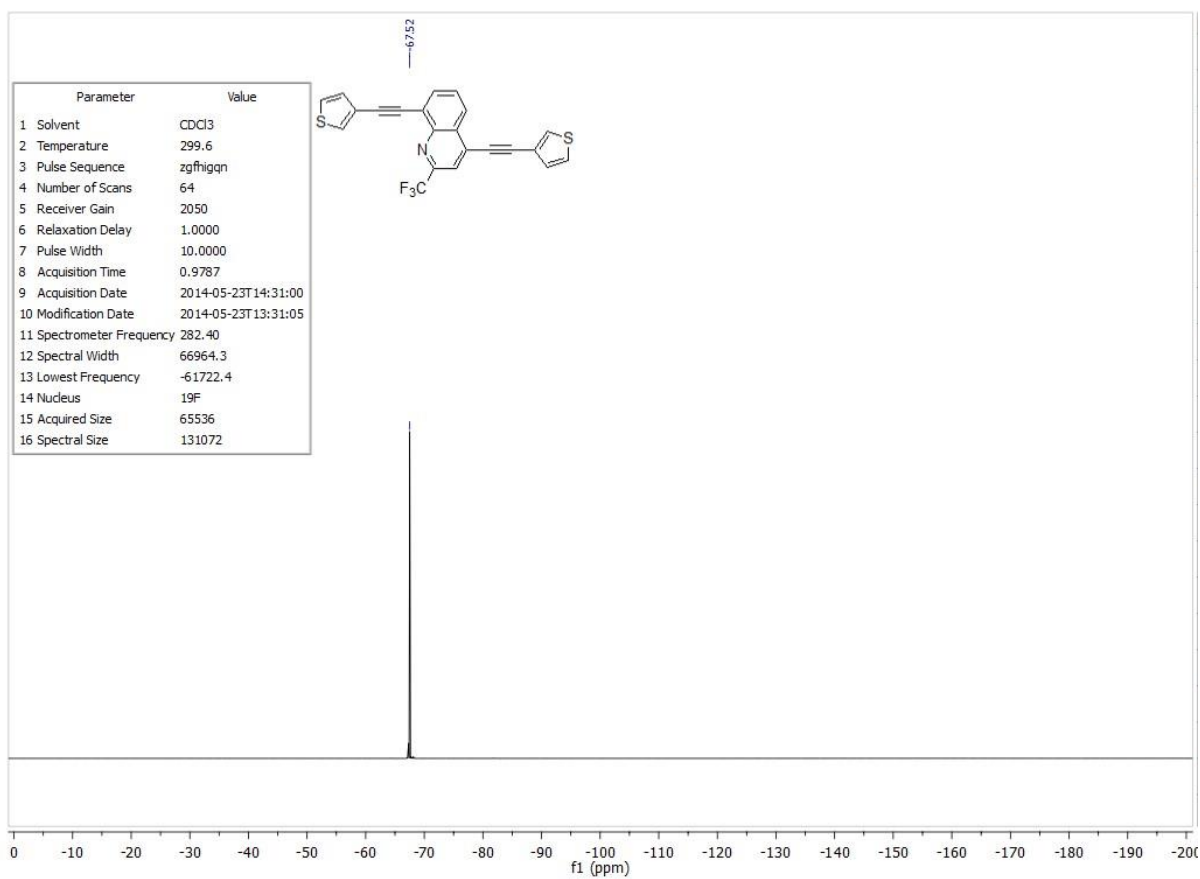

# 6g - 4,8-Bis(cyclopropylethynyl)-2-trifluoromethylquinoline

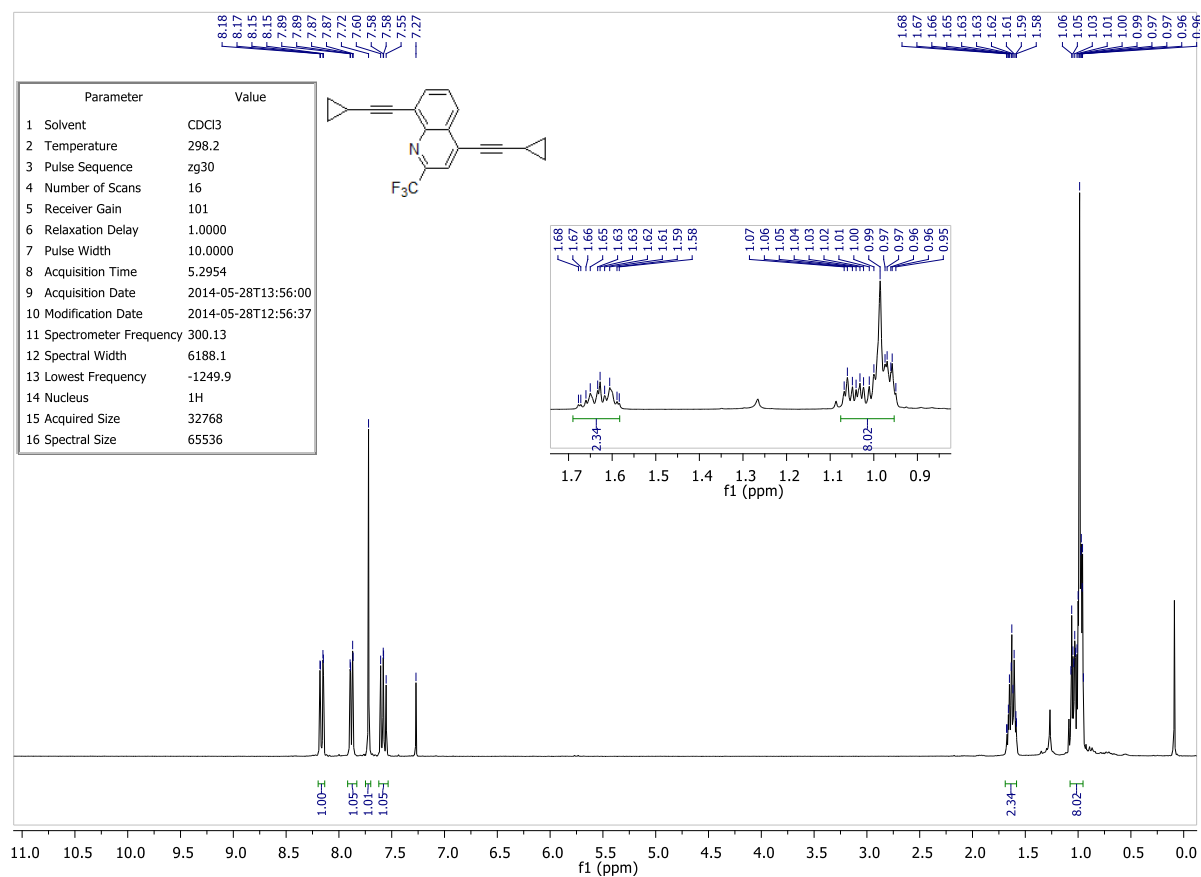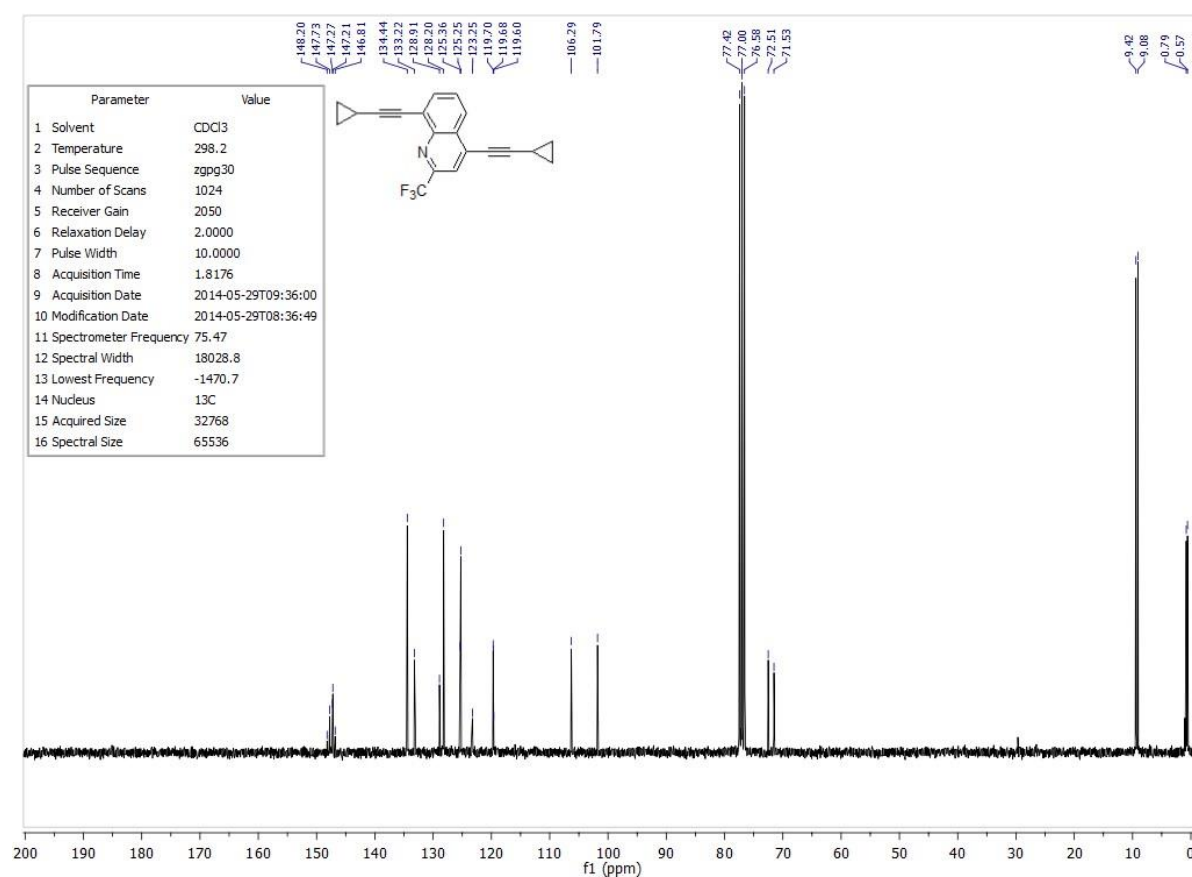



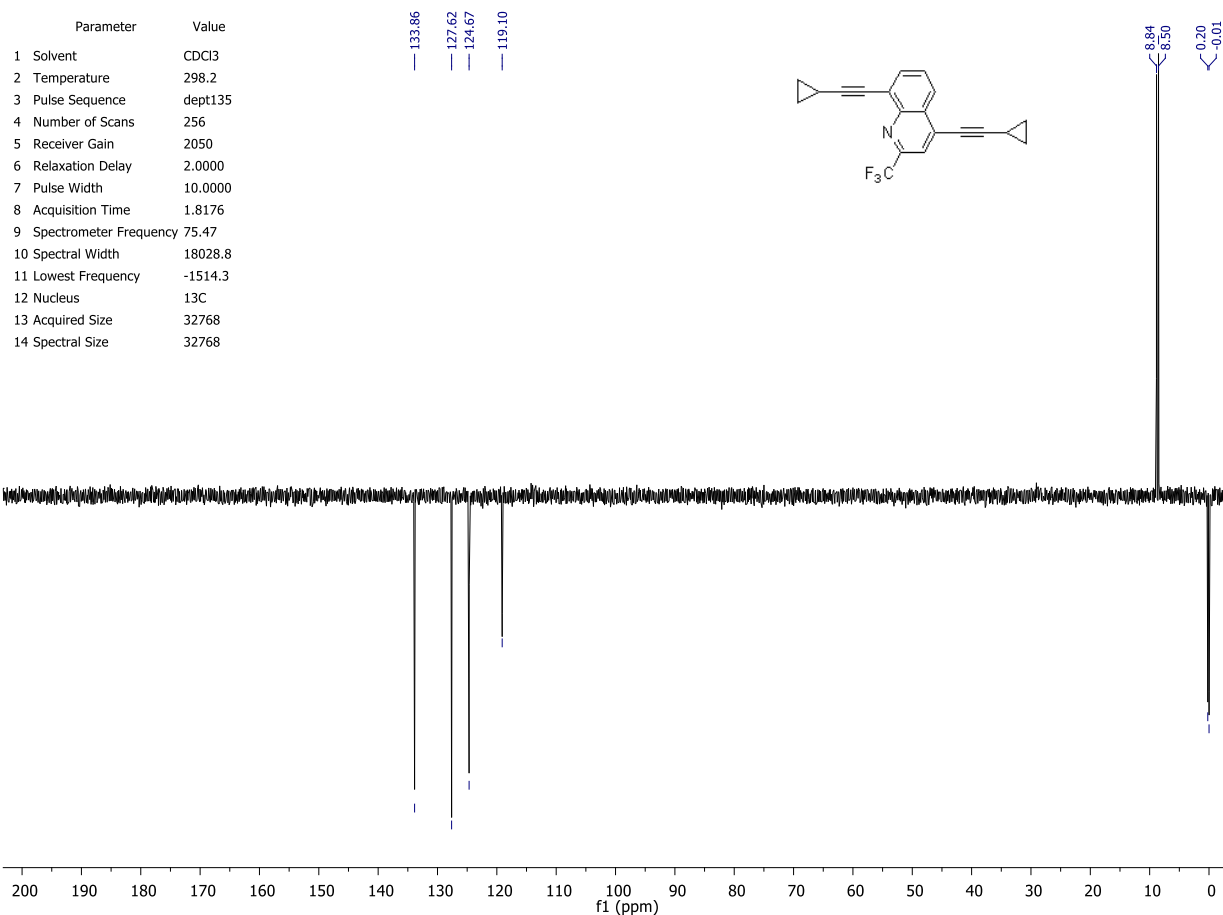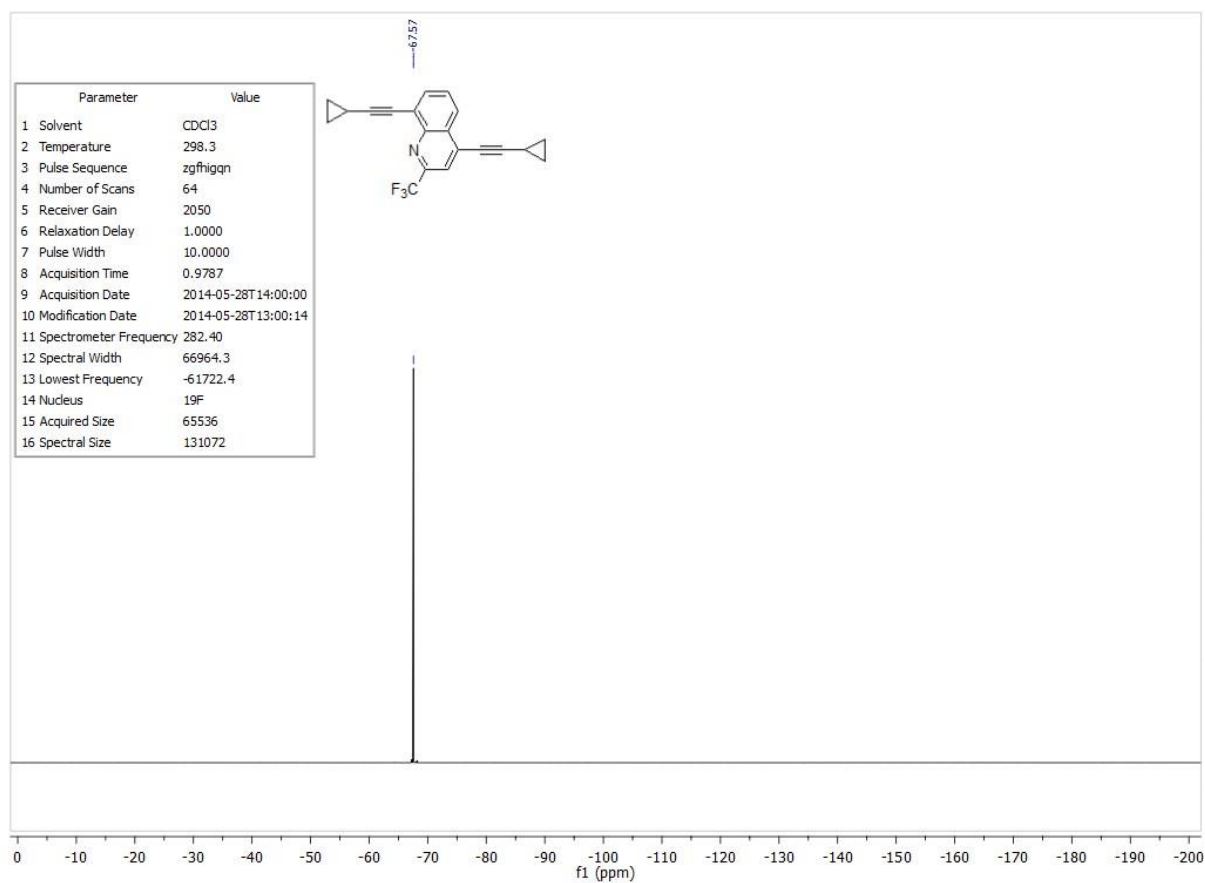

# 9a - 4,6-Bis(phenylethynyl)-2-trifluoromethylquinoline

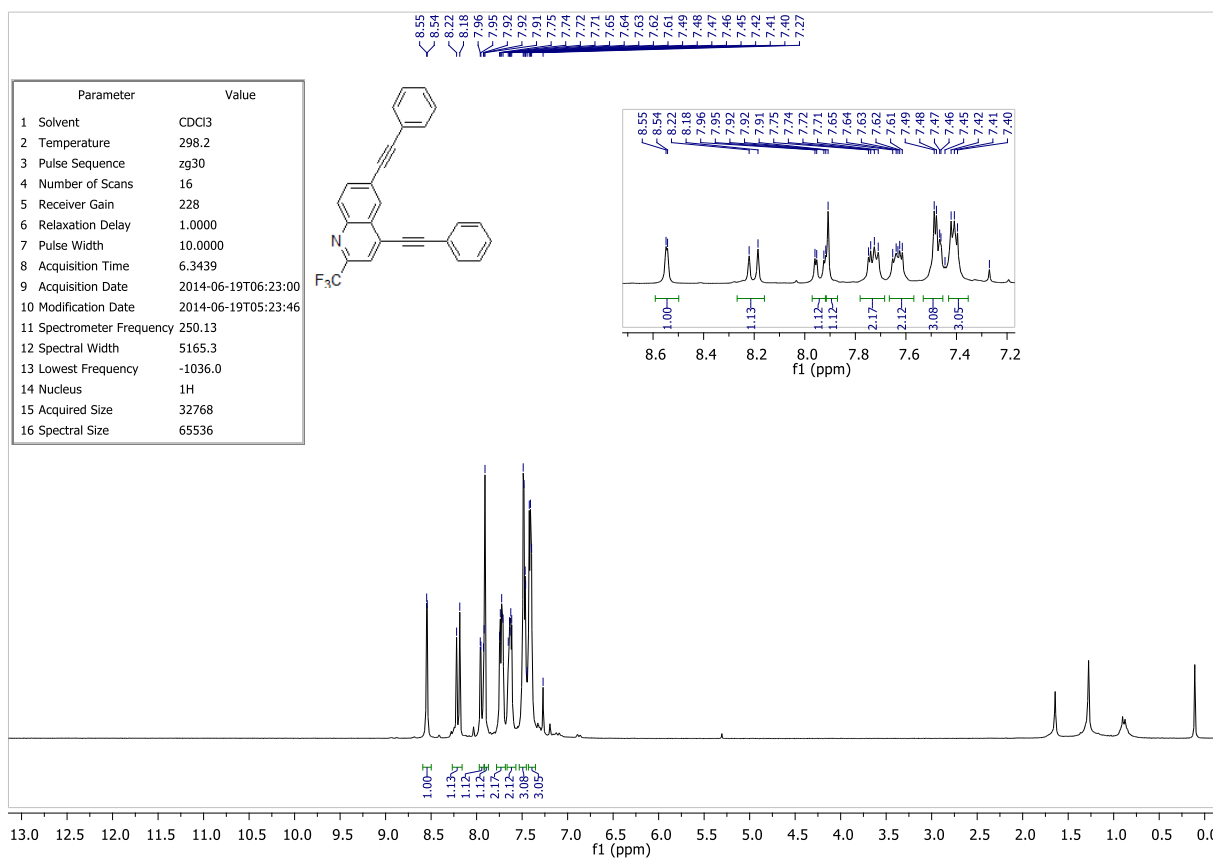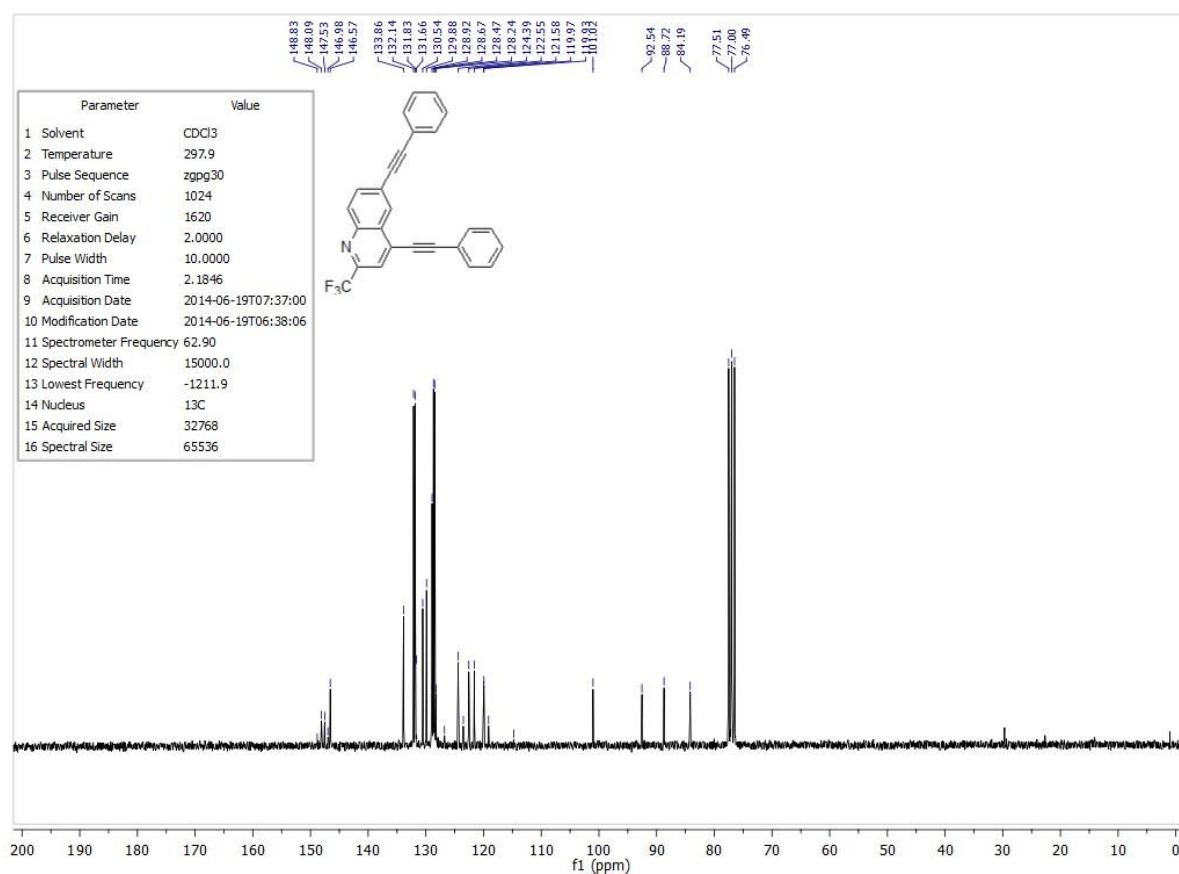

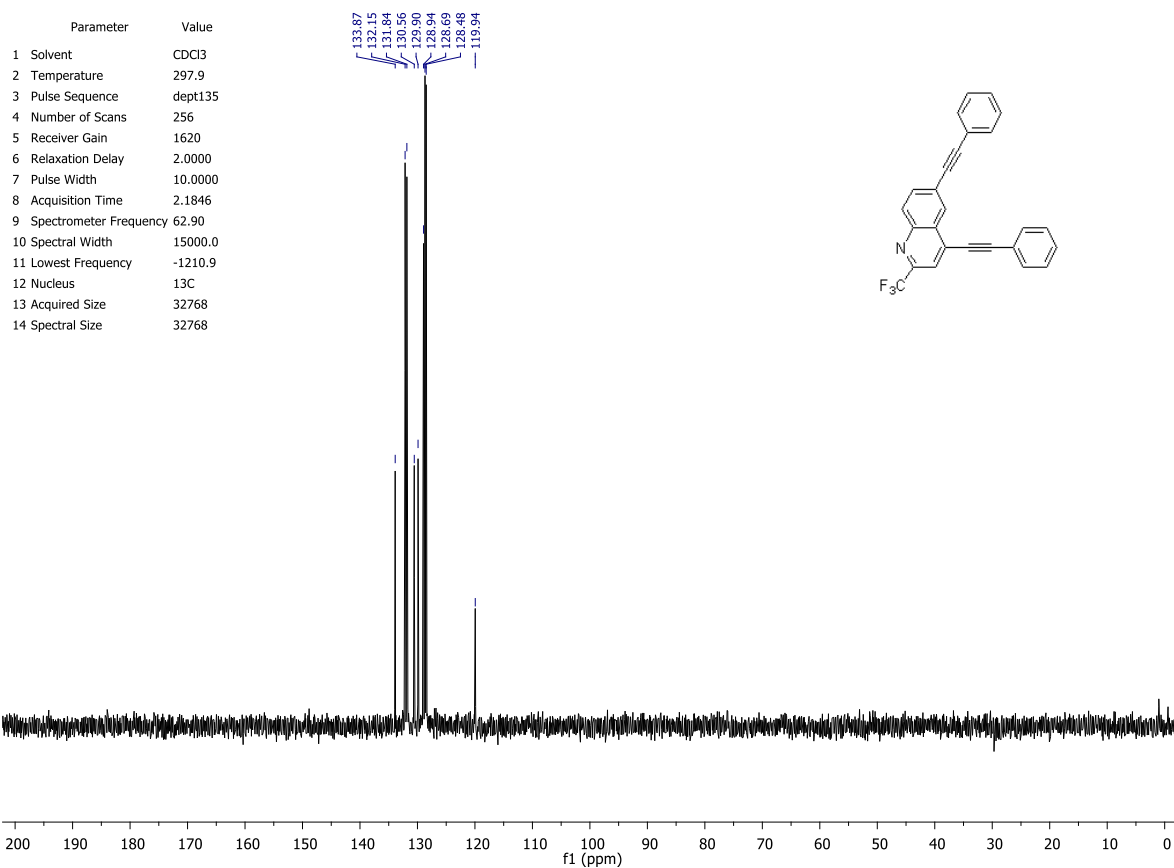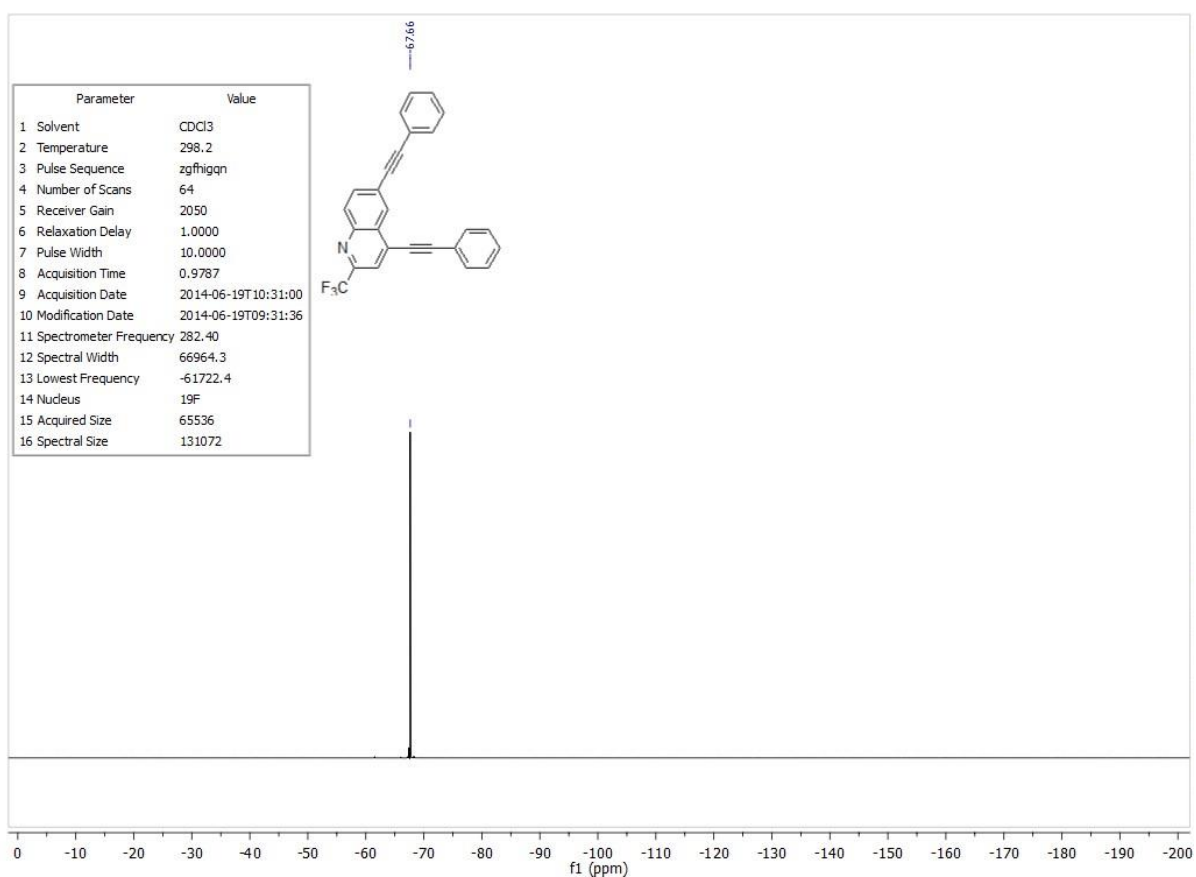

# 9b - 4,6-Bis(4'-tert-butylphenylethynyl)-2-trifluoromethylquinoline

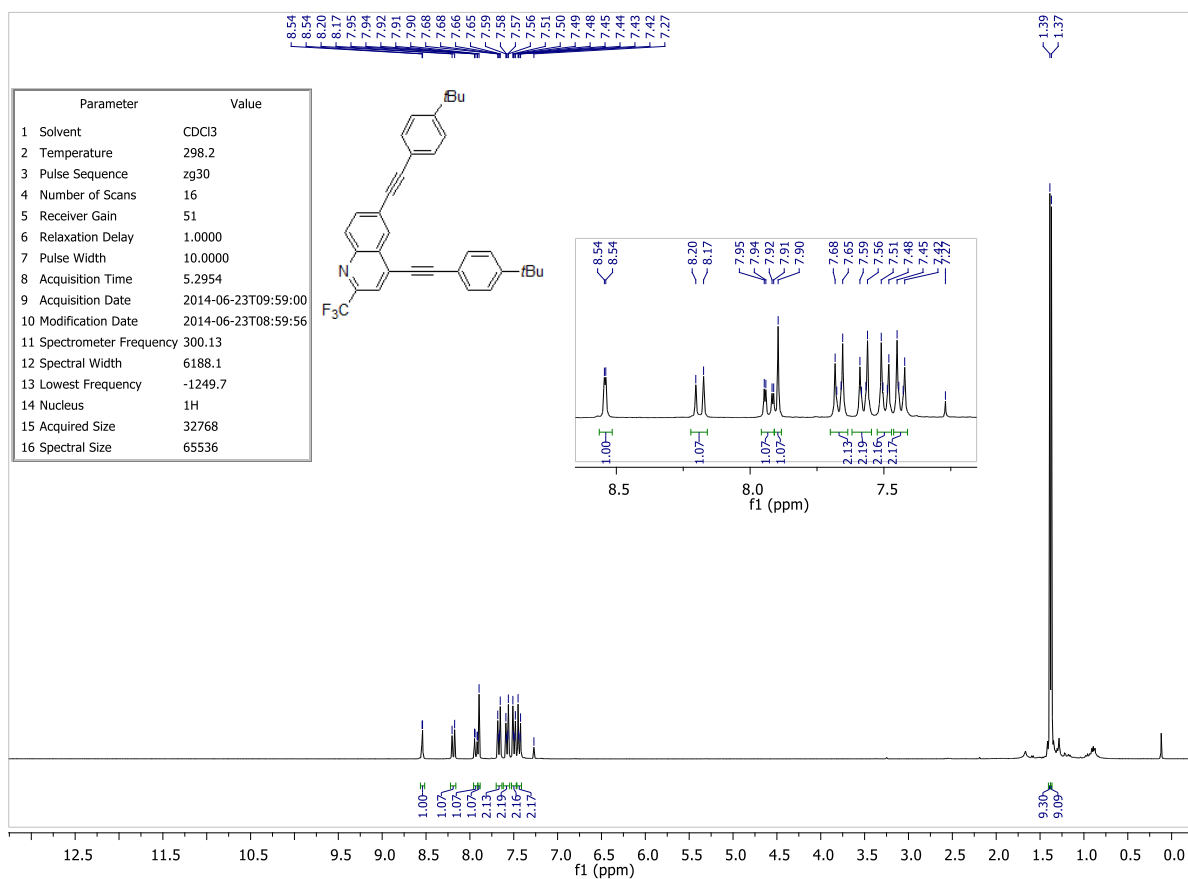

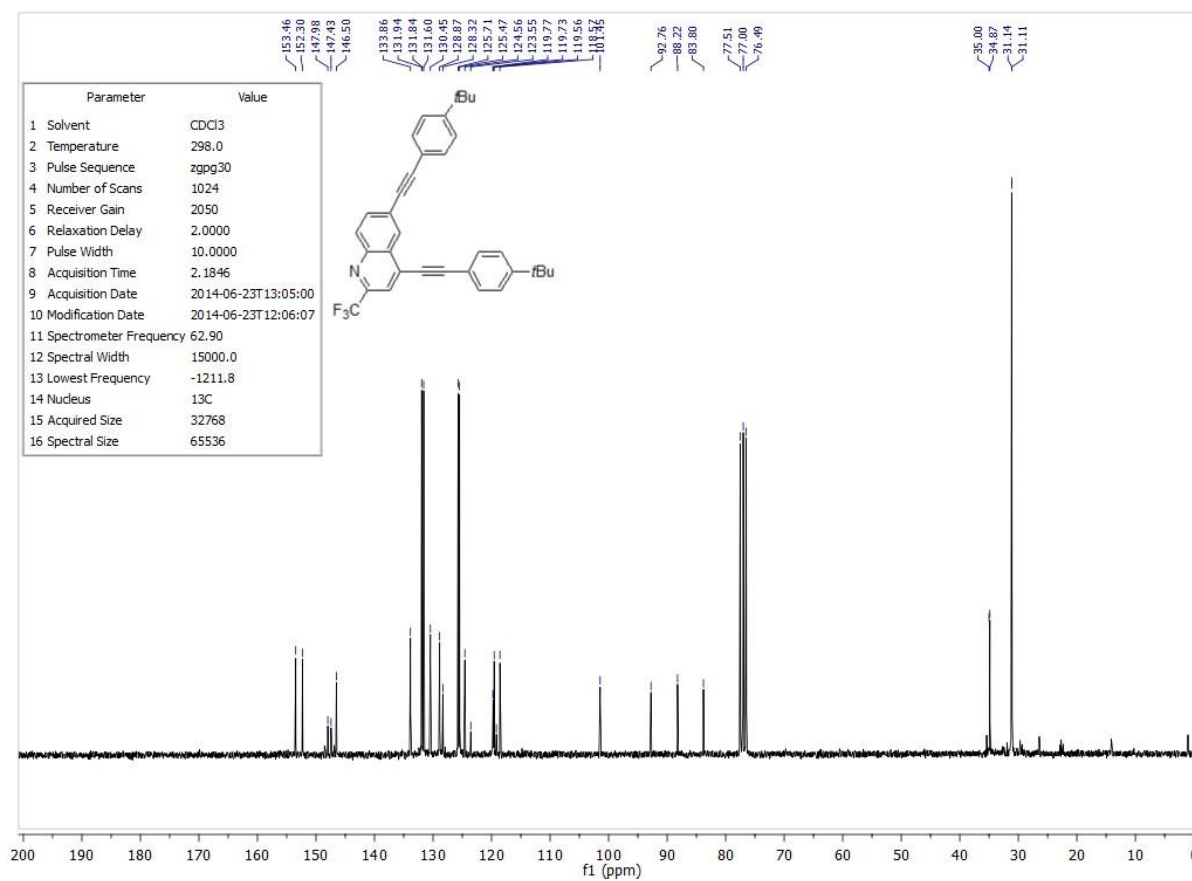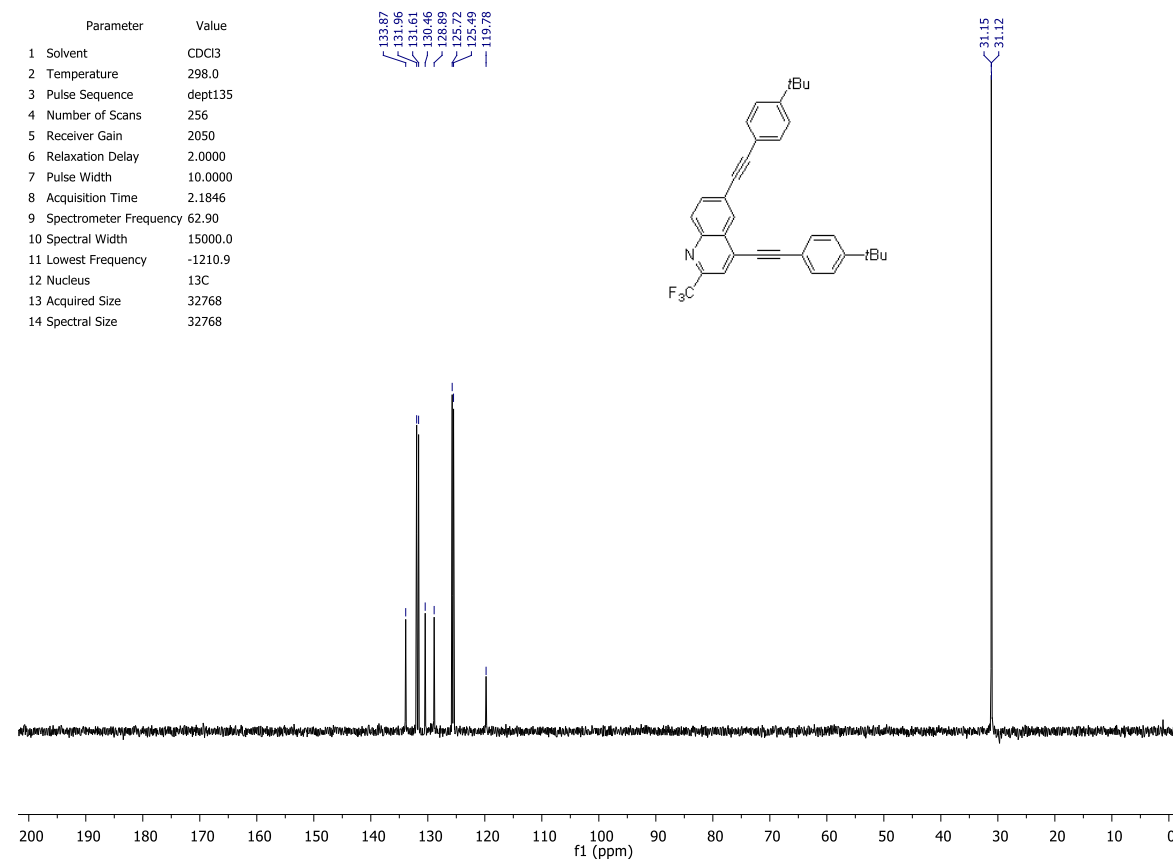

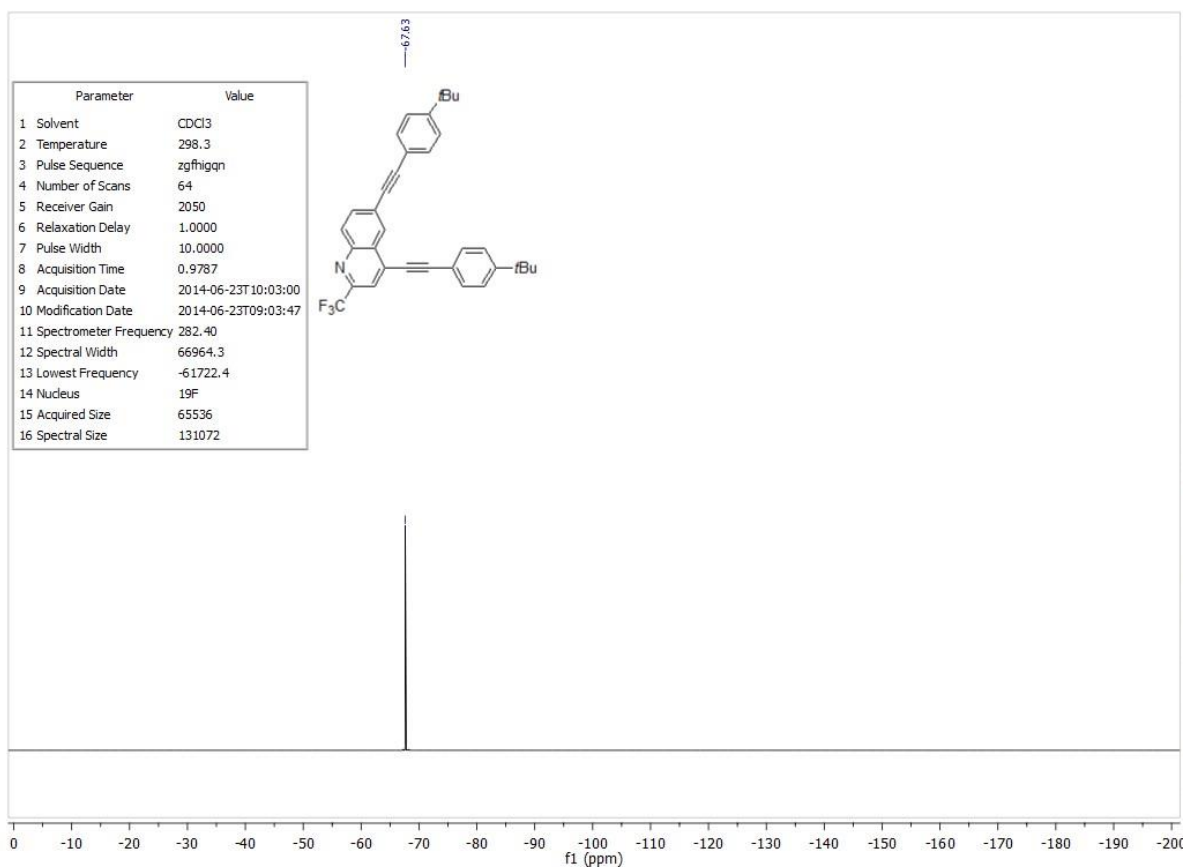

## 9d - 4,6-Bis(4'-fluorophenylethynyl)-2-trifluoromethylquinoline

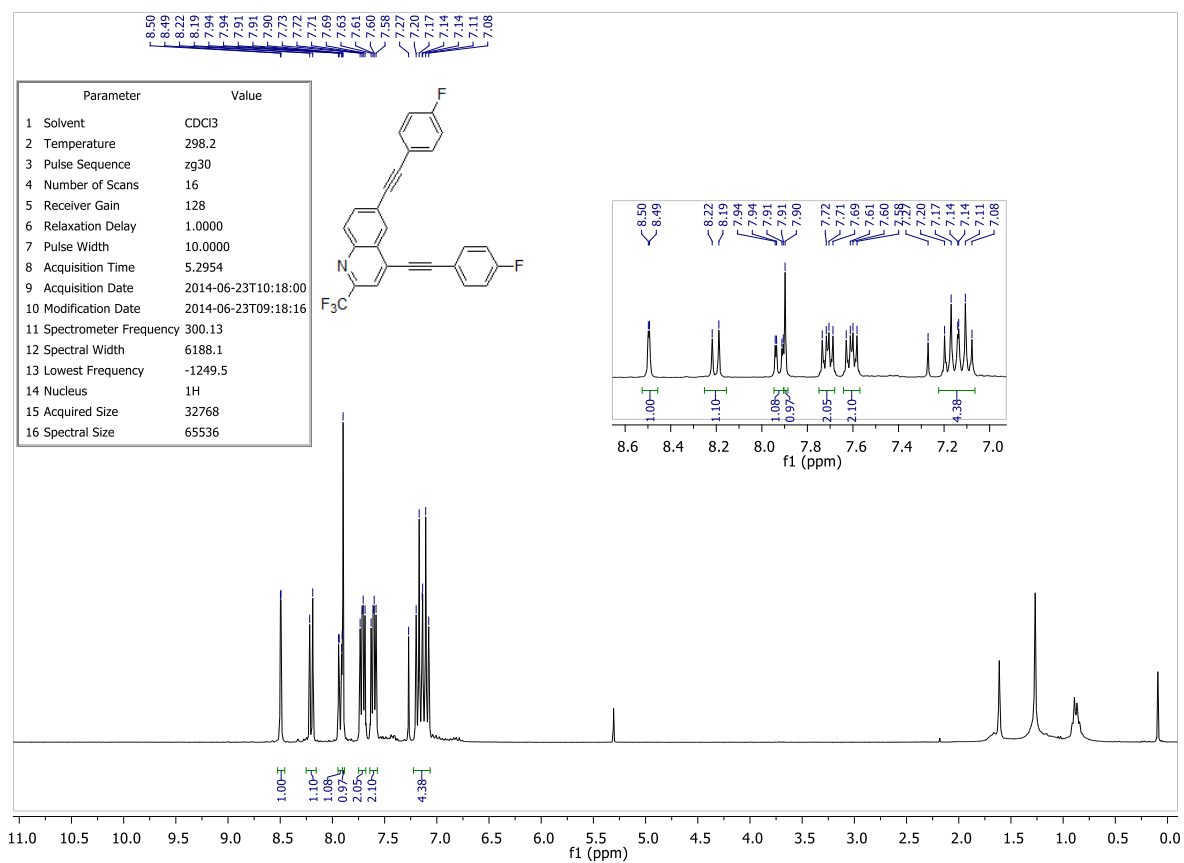

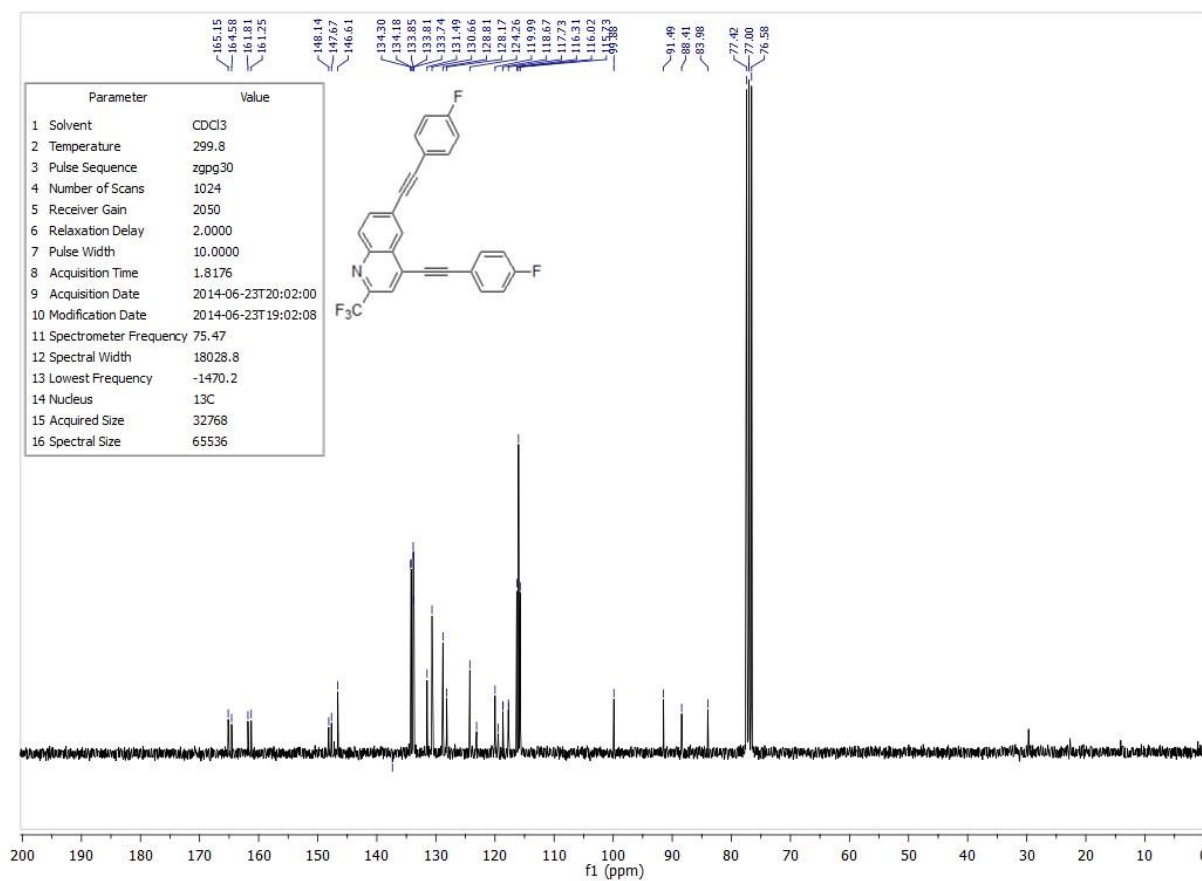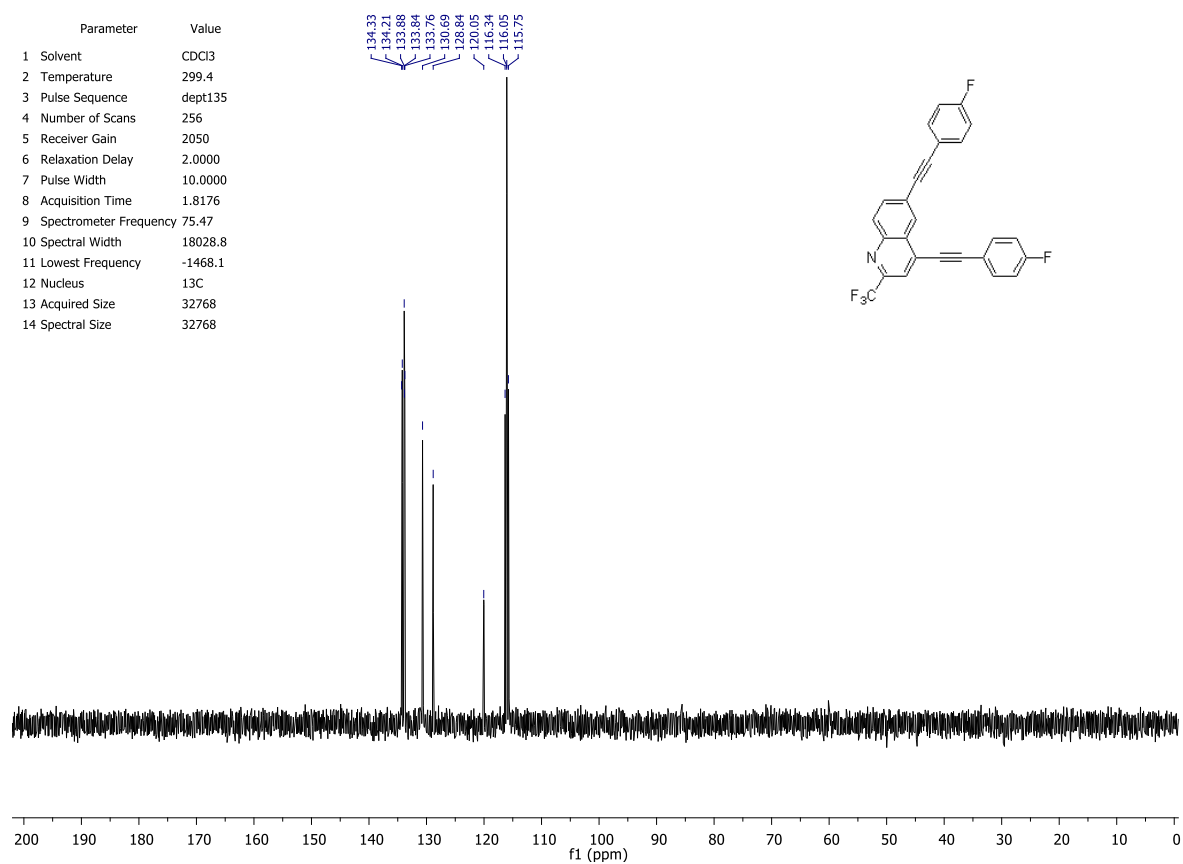

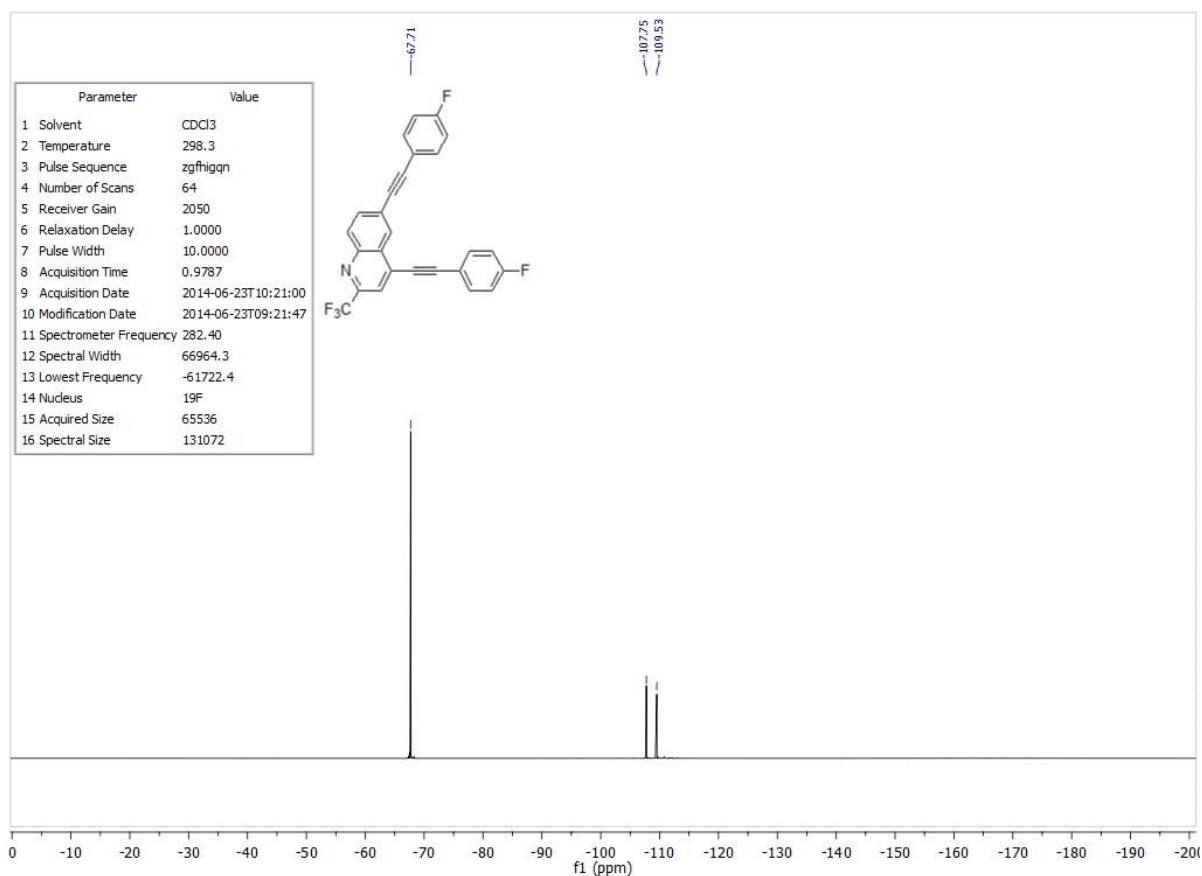

9e - 4,6-Bis(4'-methoxyphenylethynyl)-2-trifluoromethylquinoline

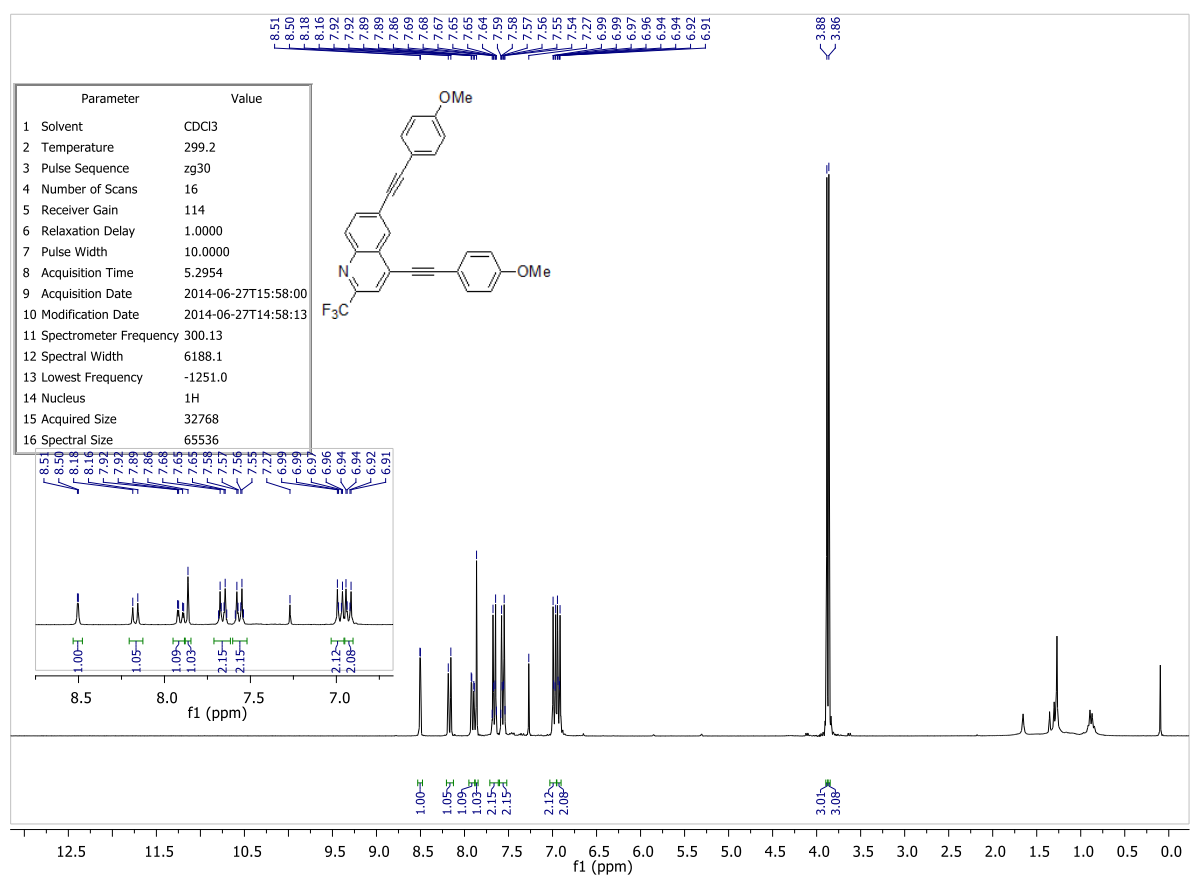



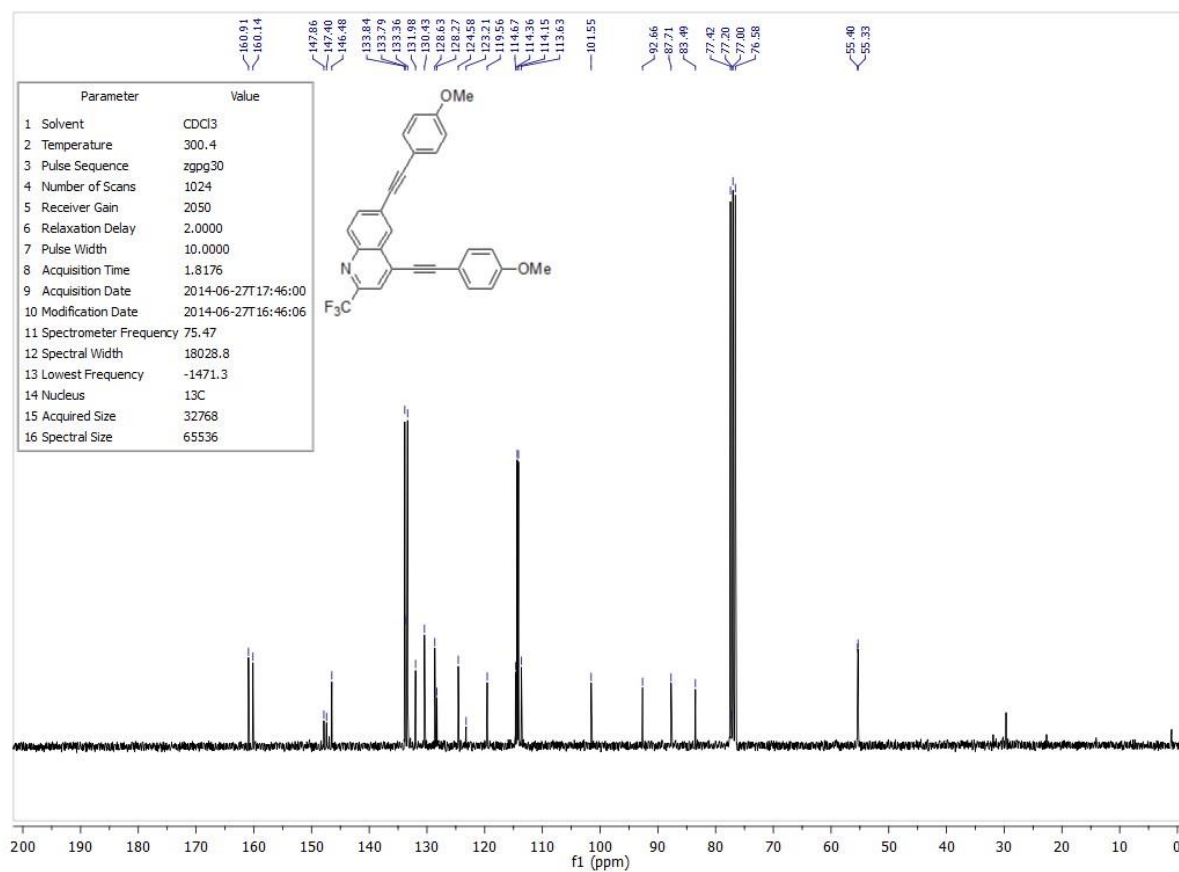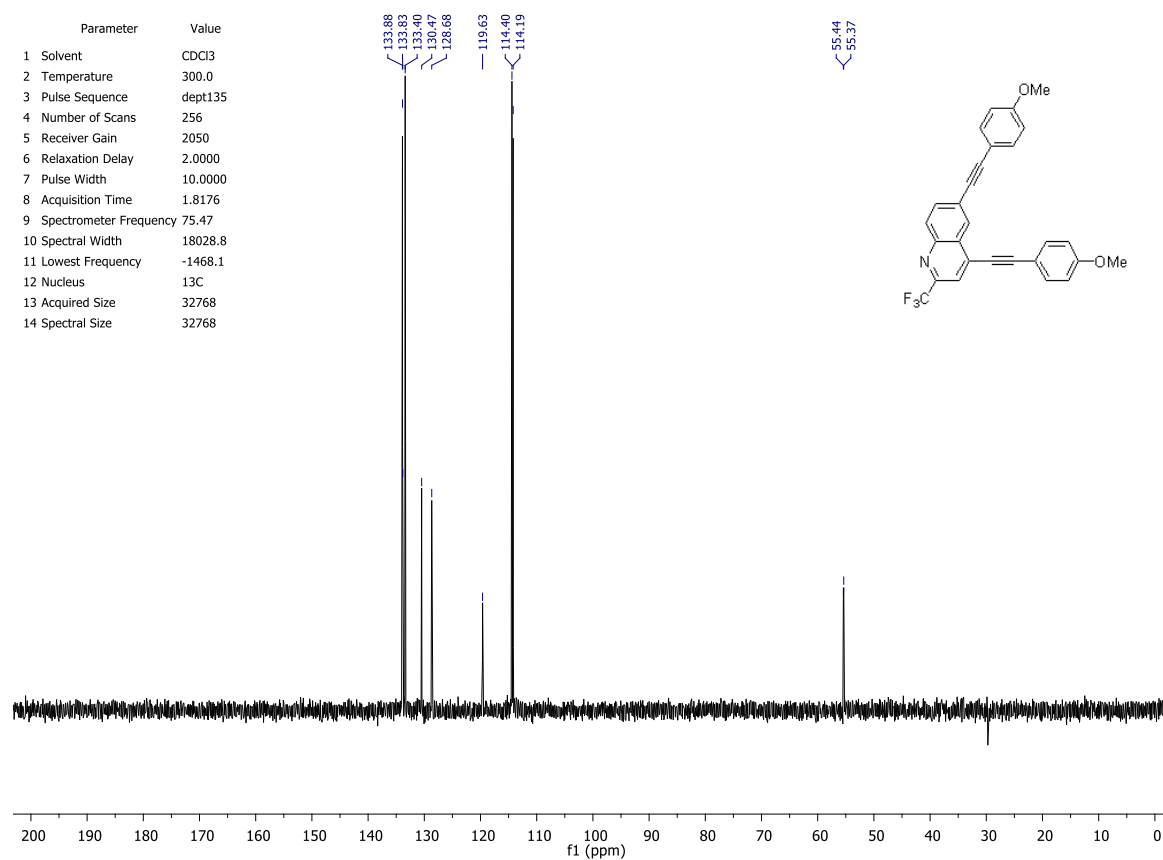

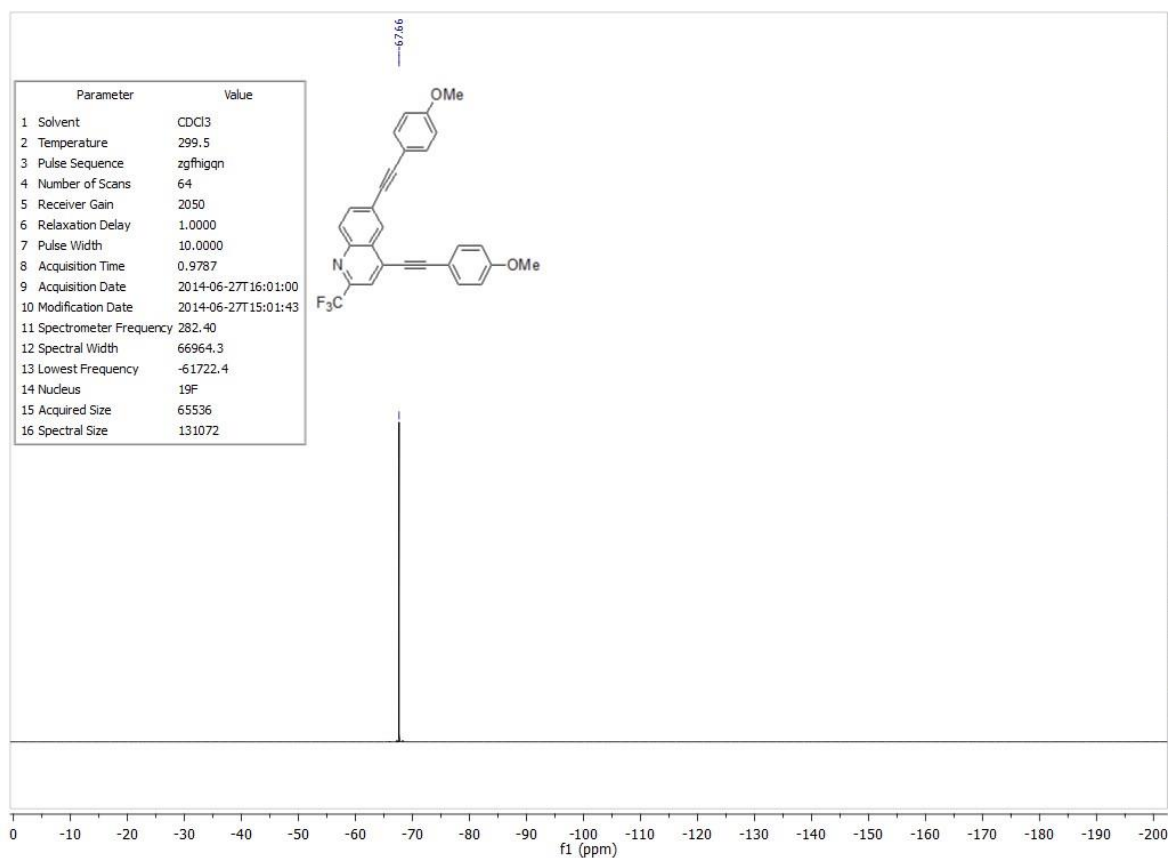

## 9f - 4,6-Bis(3'-thienylethynyl)-2-trifluoromethylquinoline

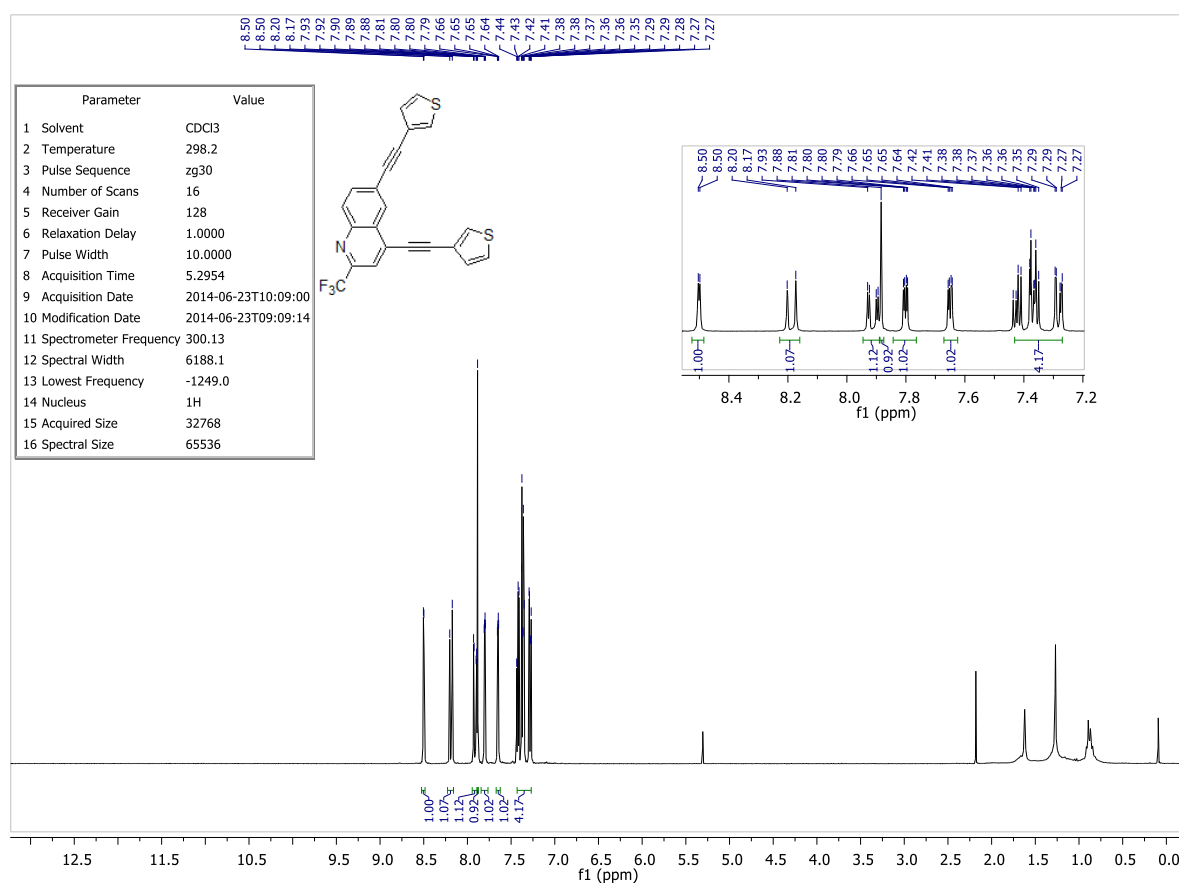

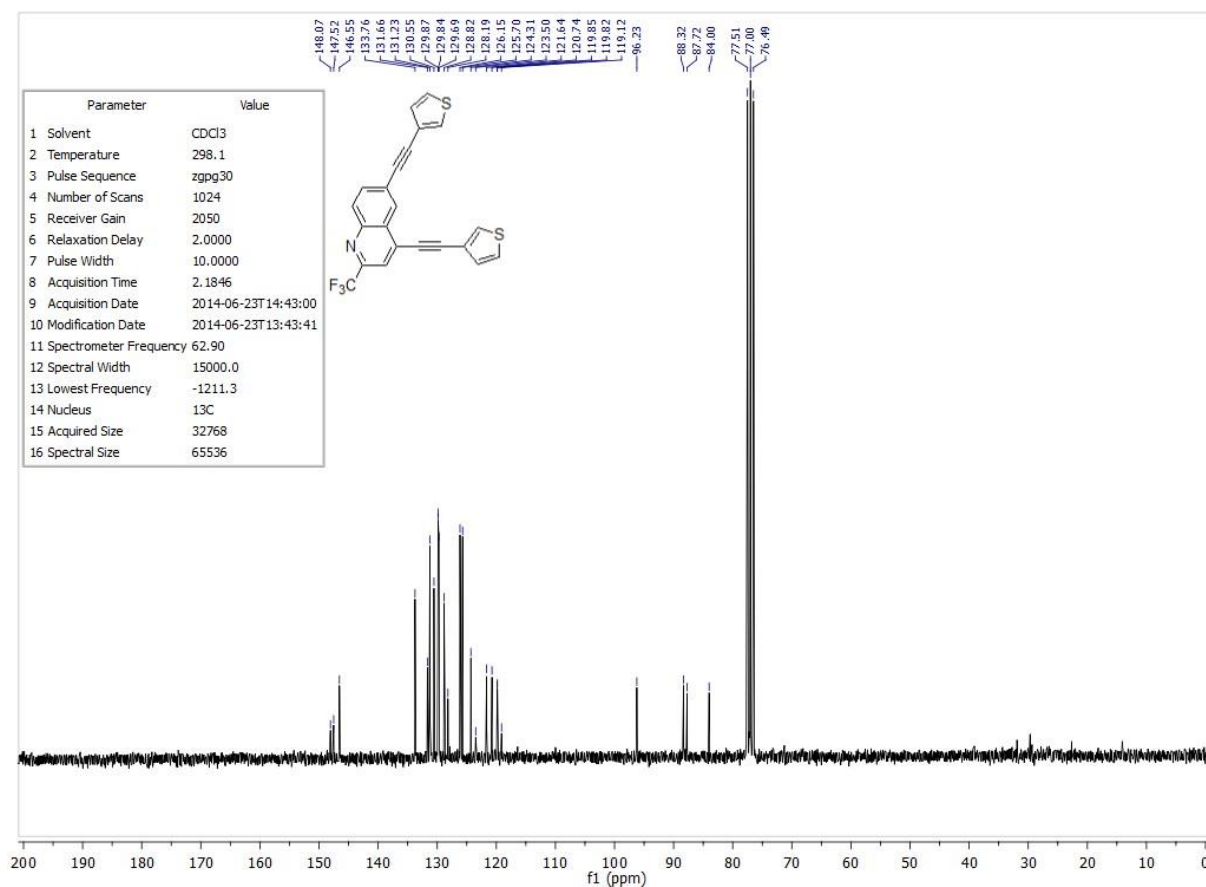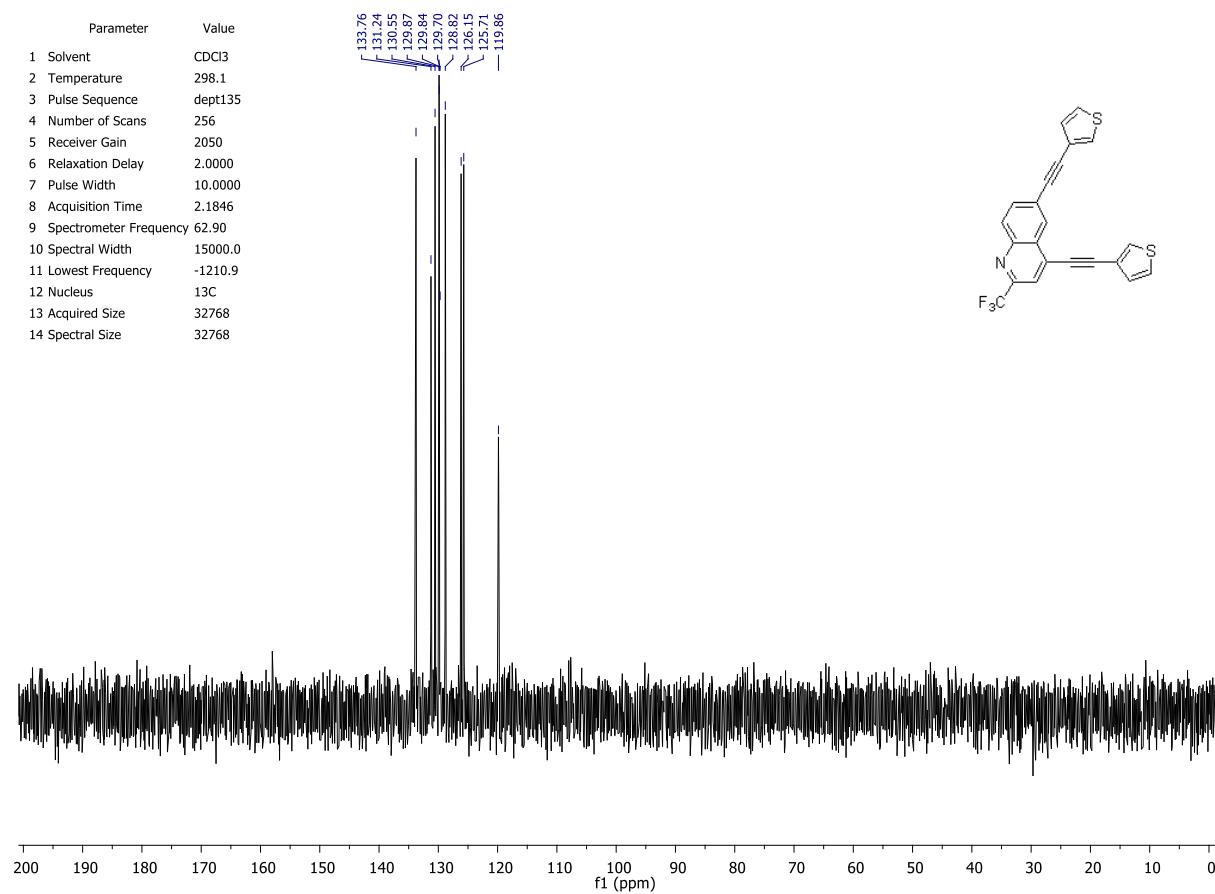

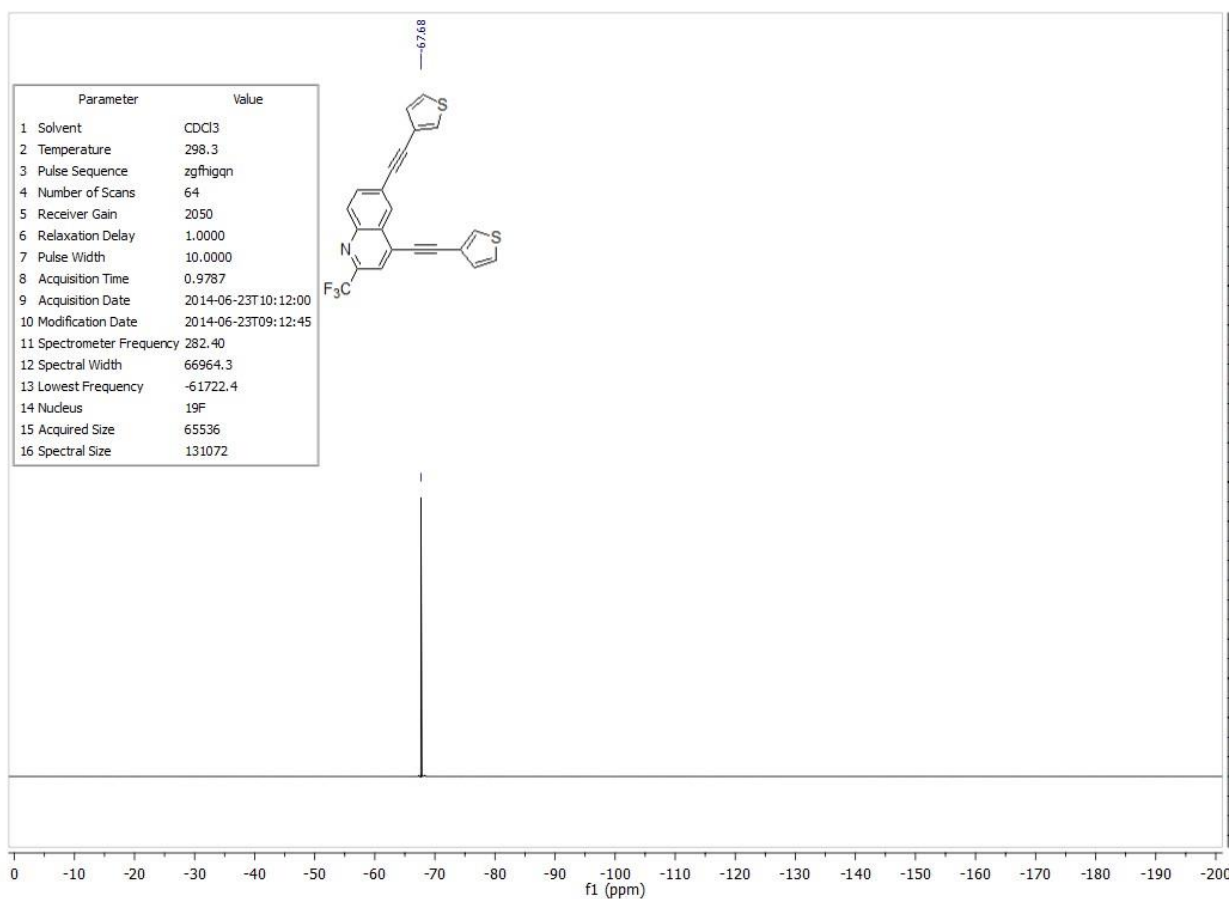

### 9g – 4,6-Bis(cyclopropylethynyl)-2-trifluoromethylquinoline

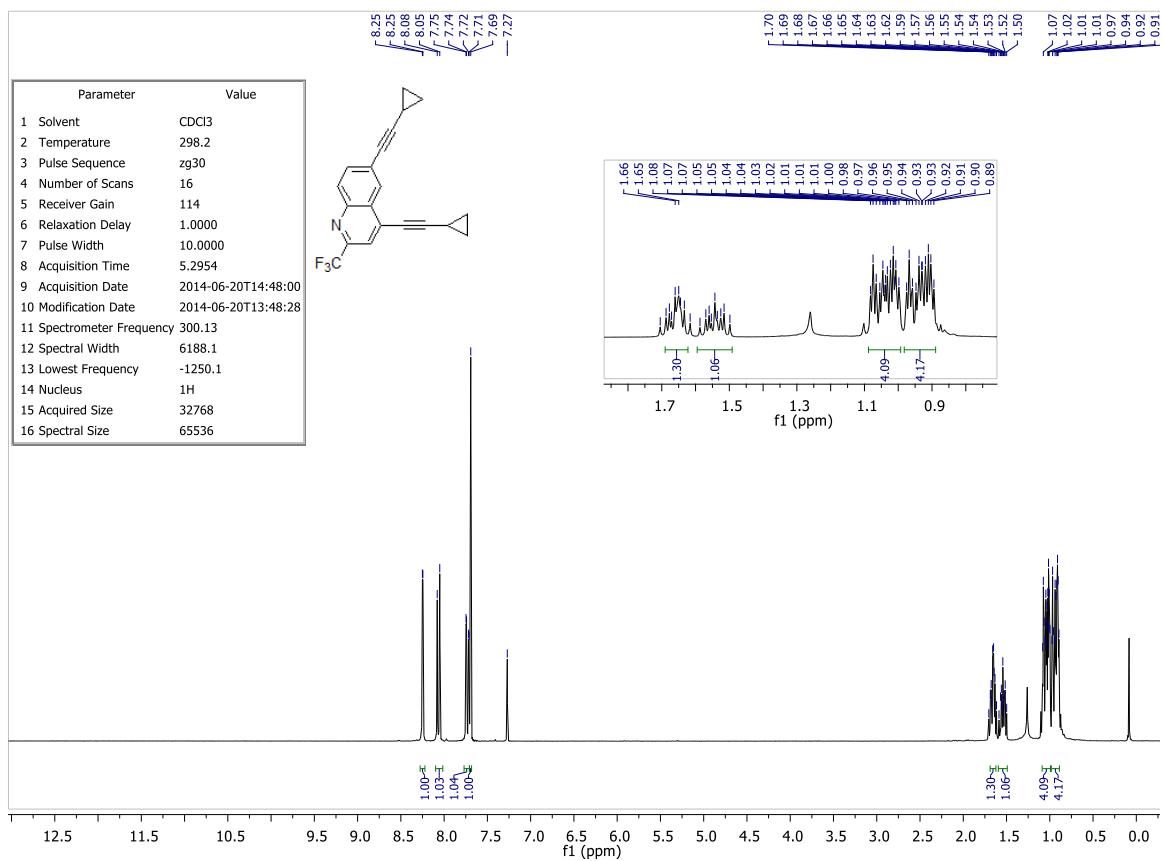

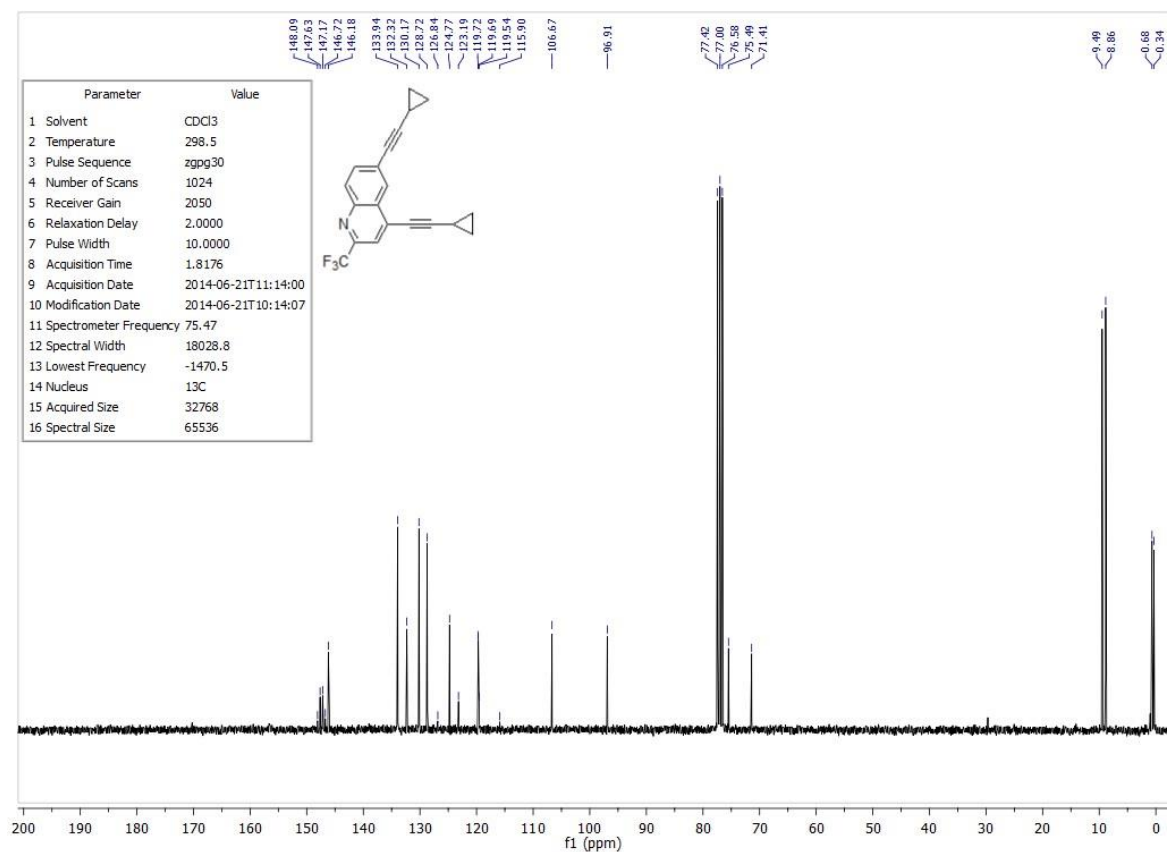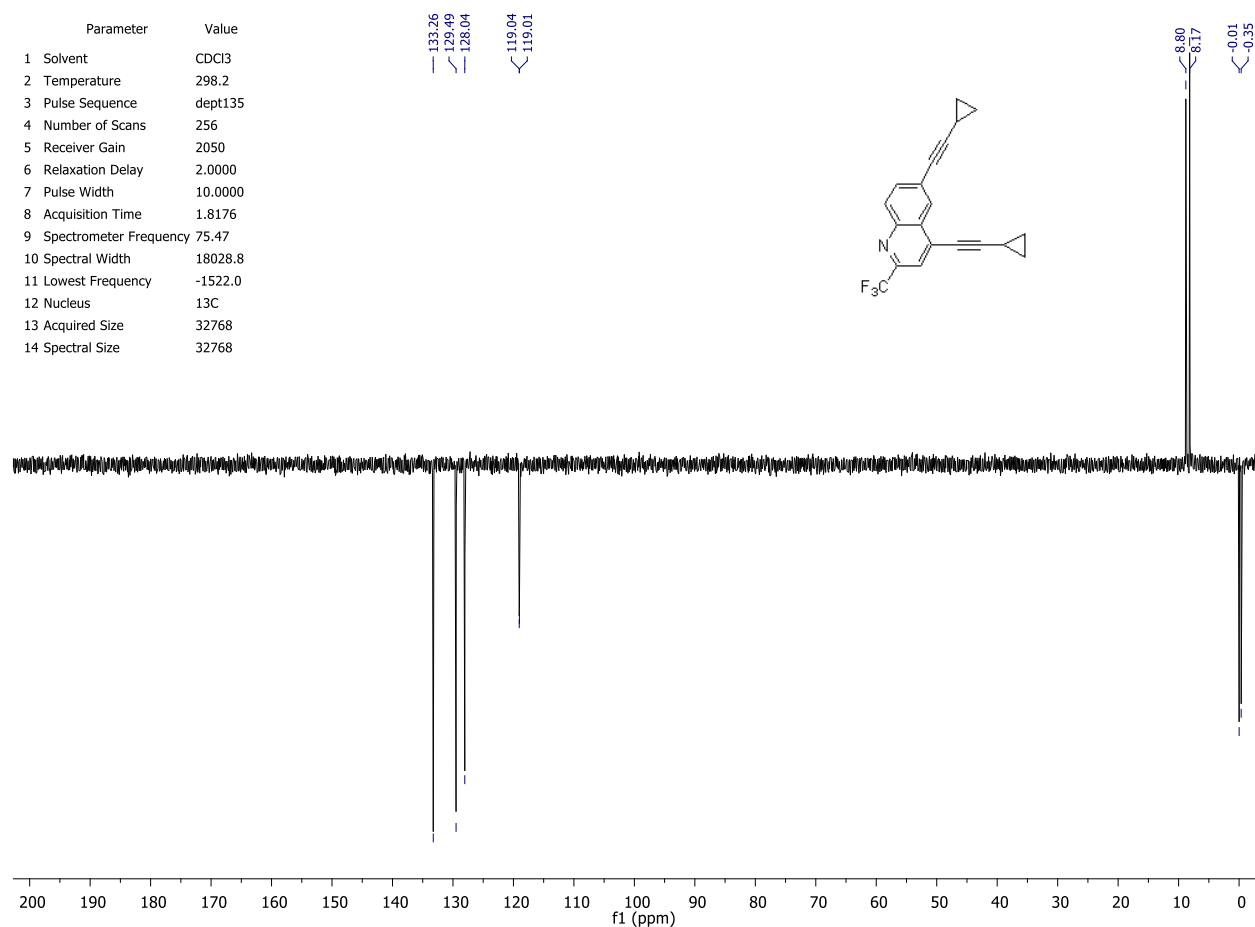

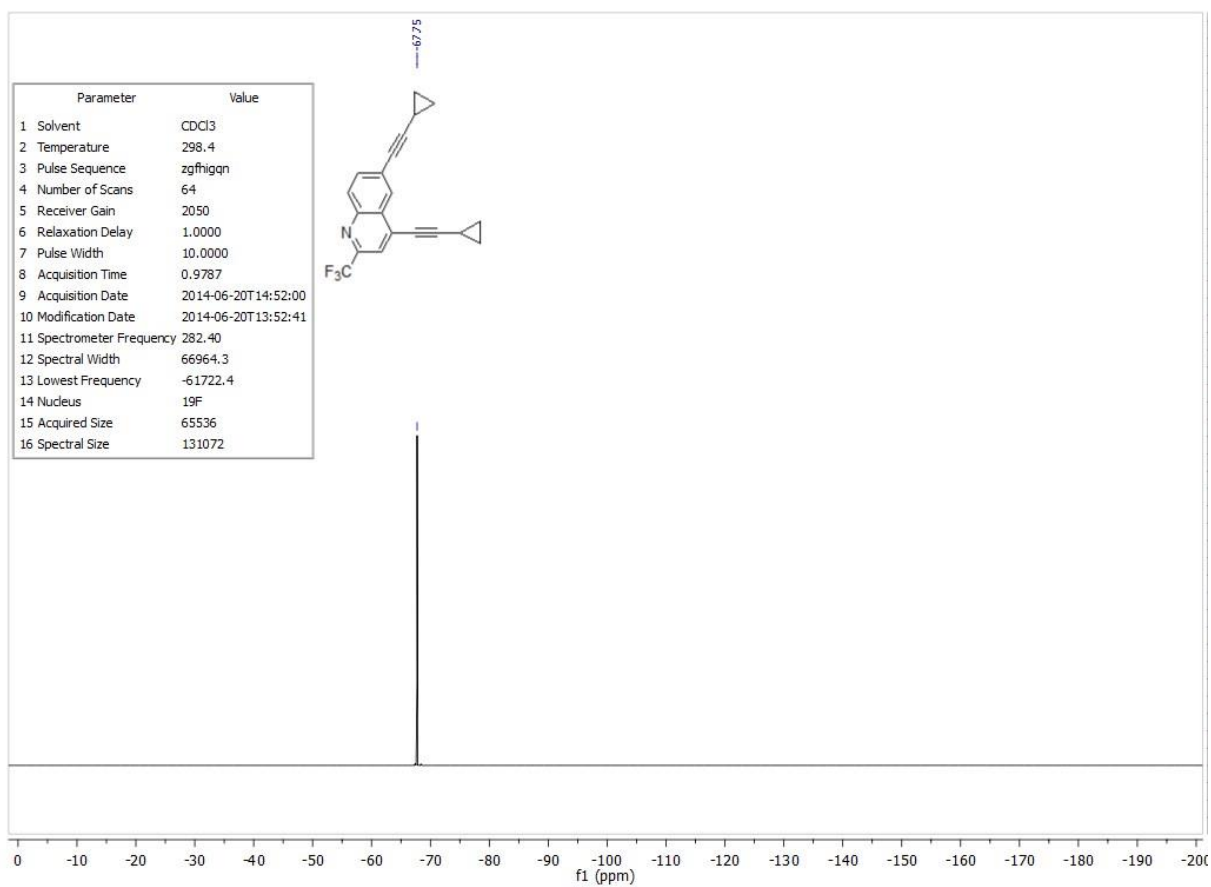

# 12a - 3,4,8-Tris(phenylethynyl)-2-trifluoromethylquinoline

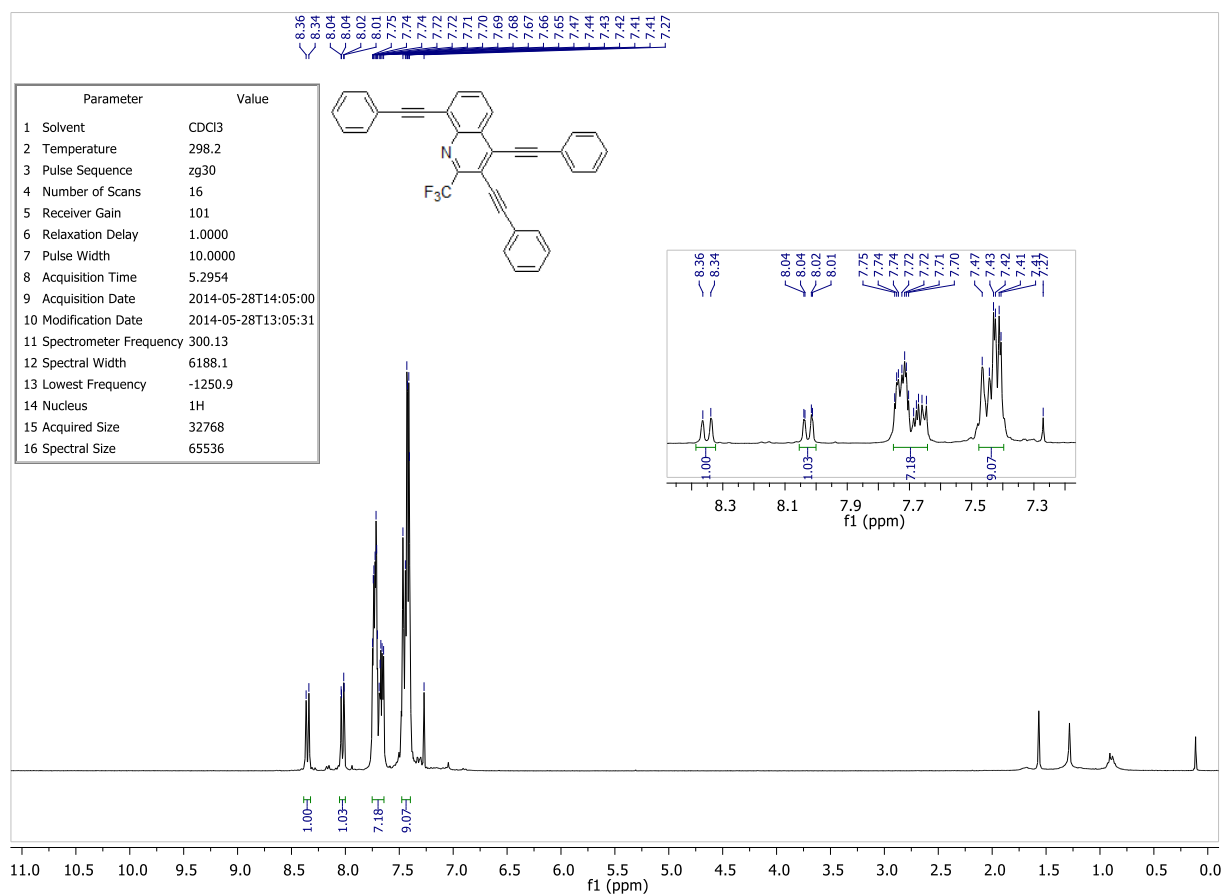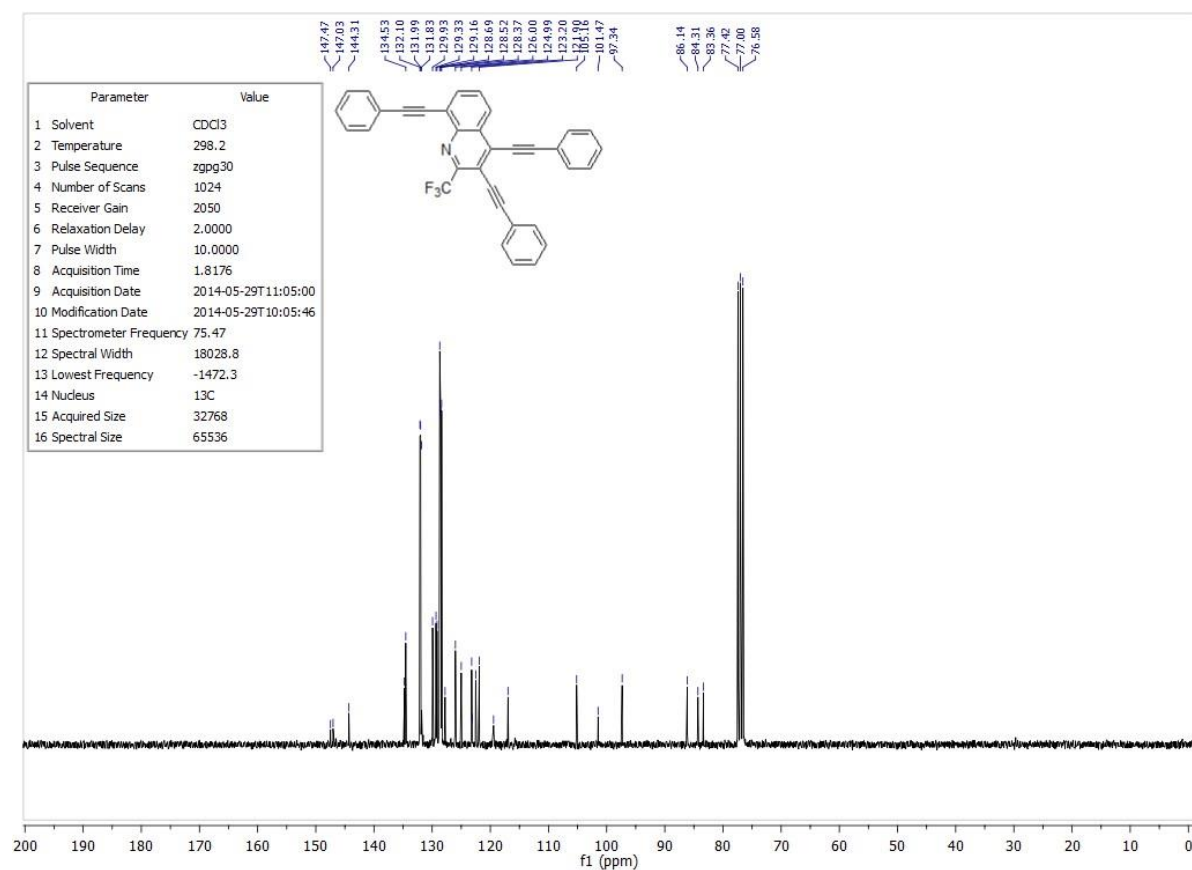

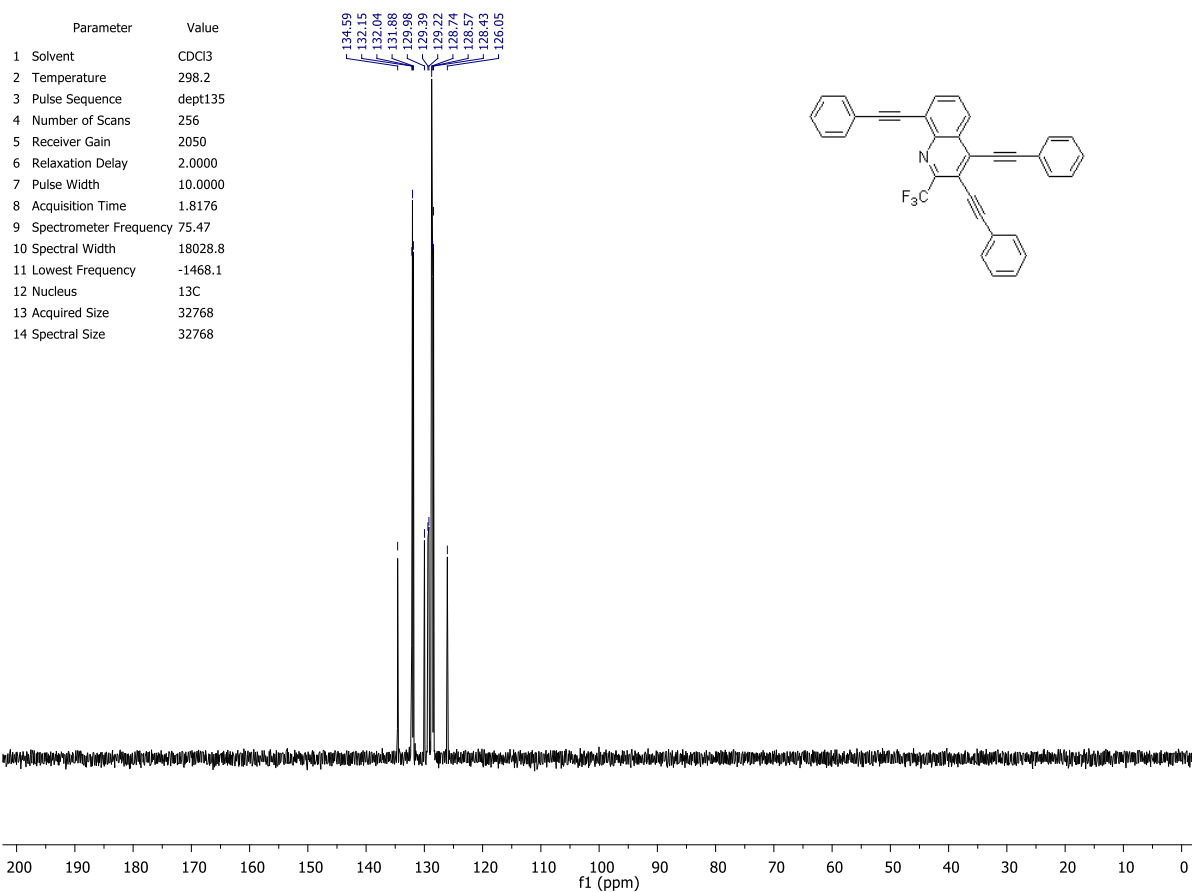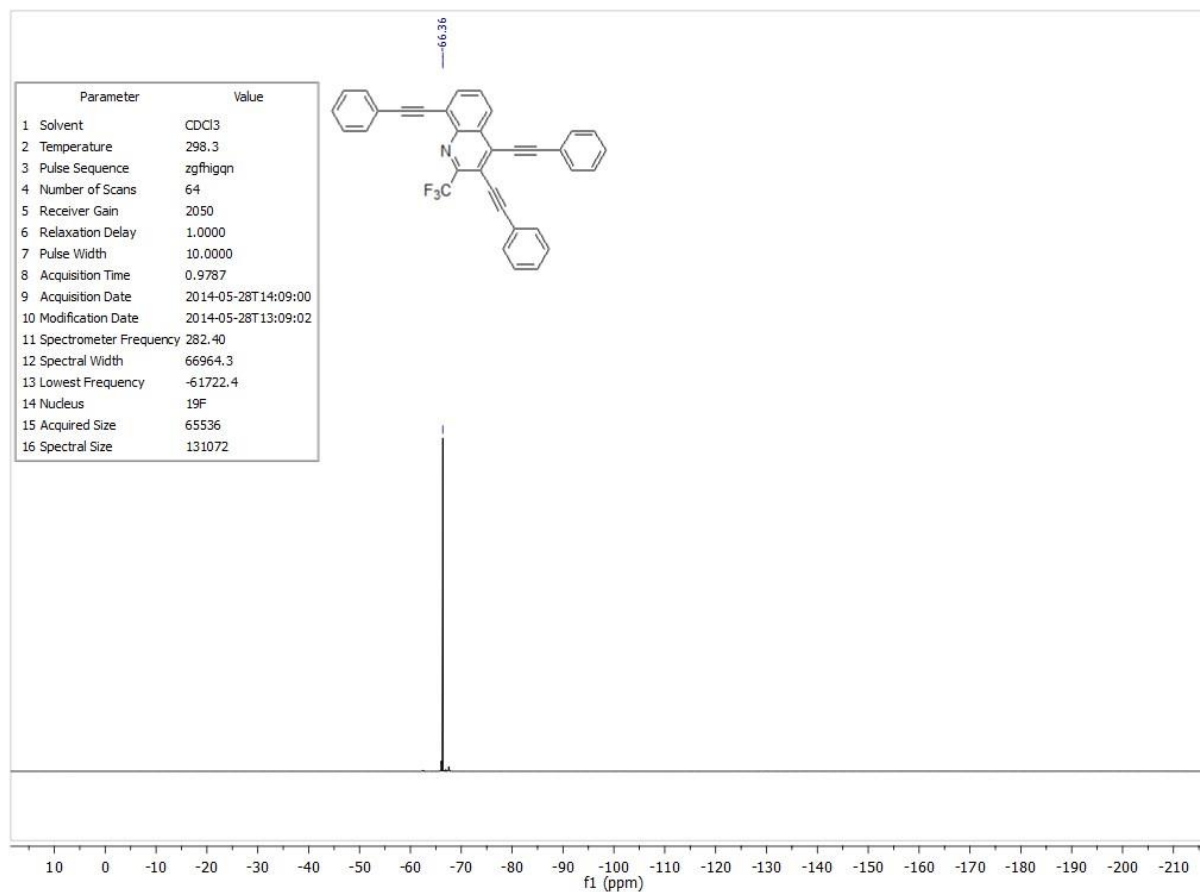



# 12b - 3,4,8-Tris(4'-tert-butylphenylethynyl)-2-trifluoromethylquinoline

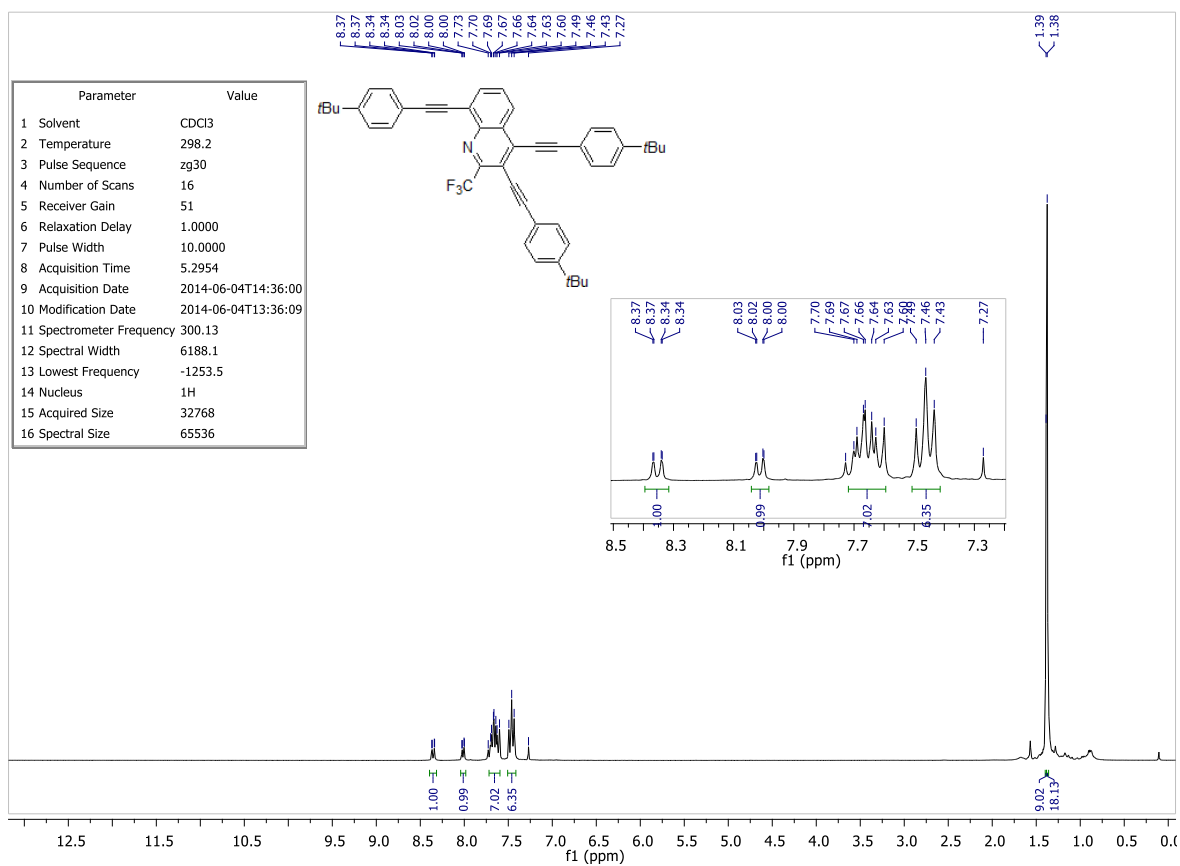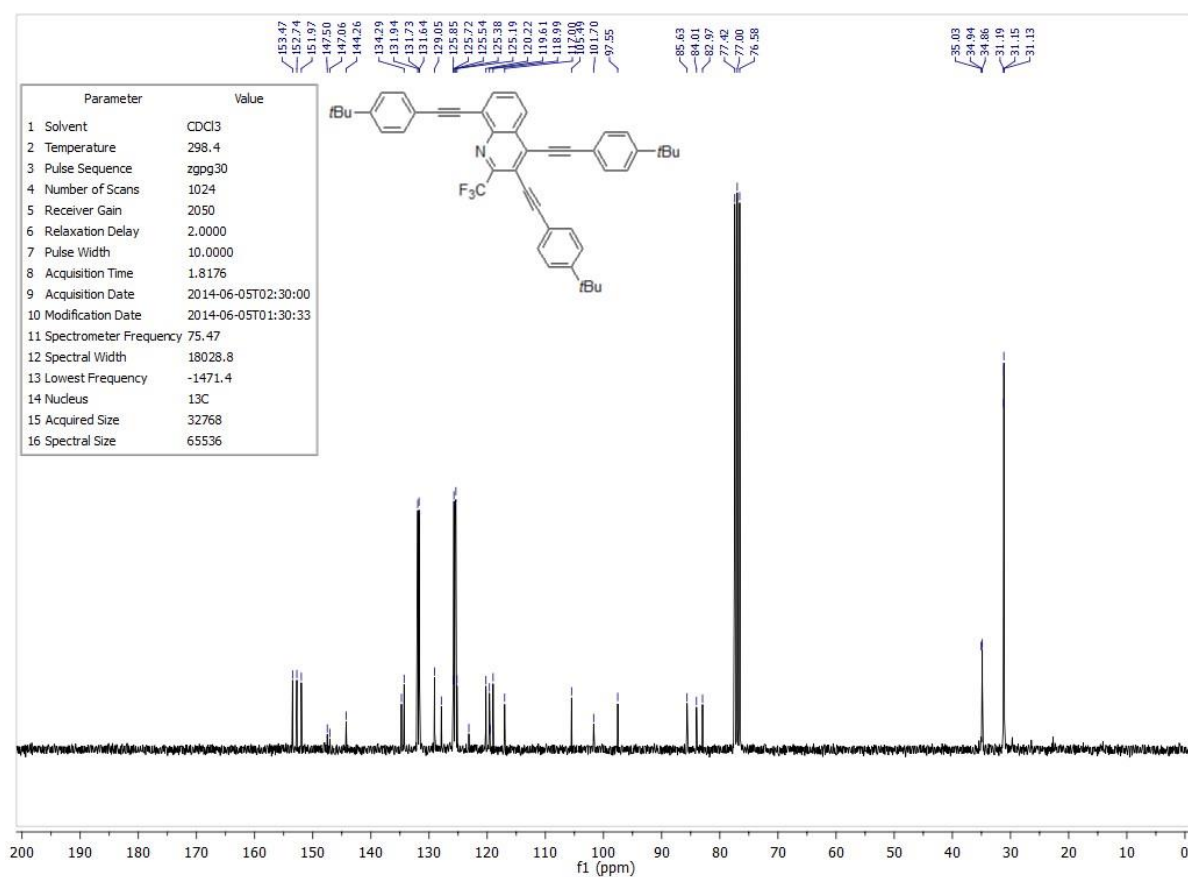

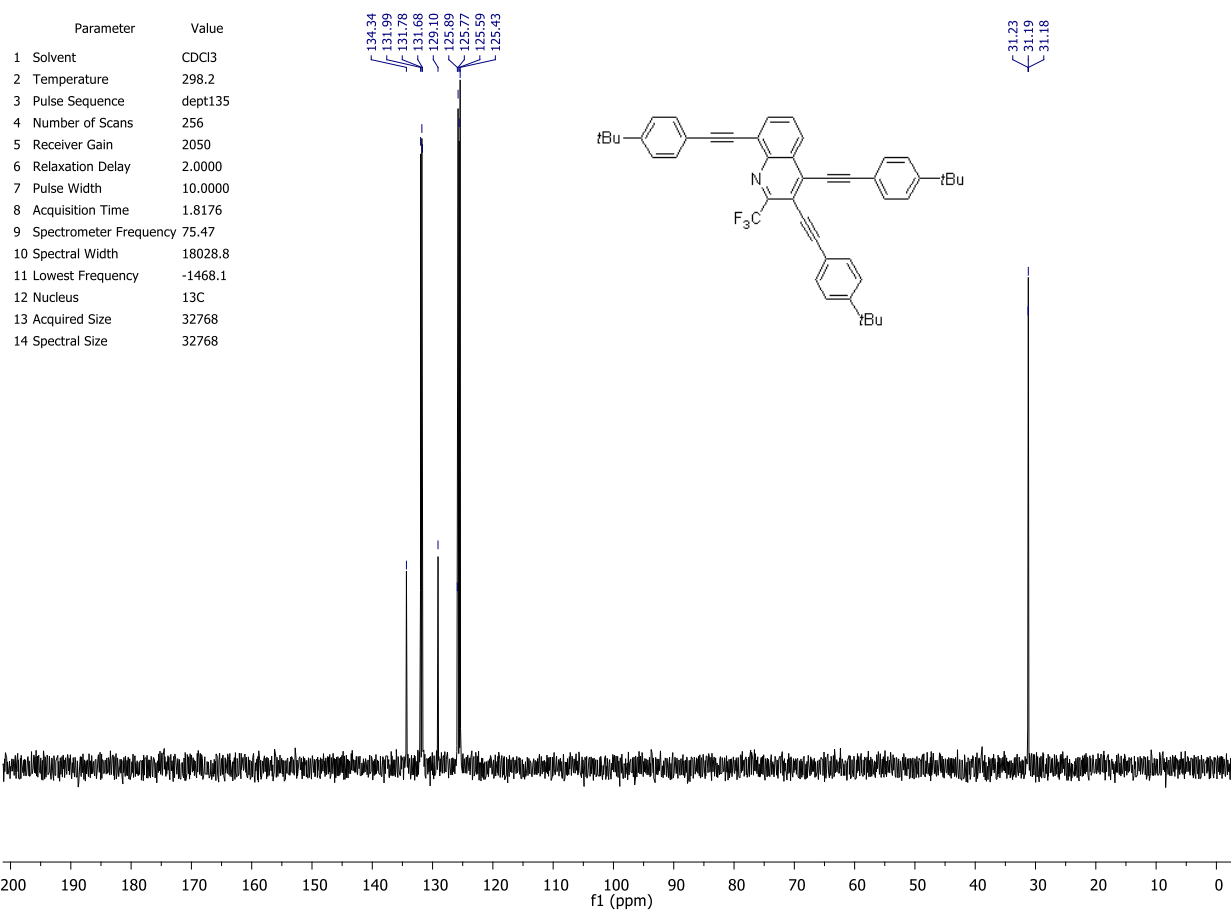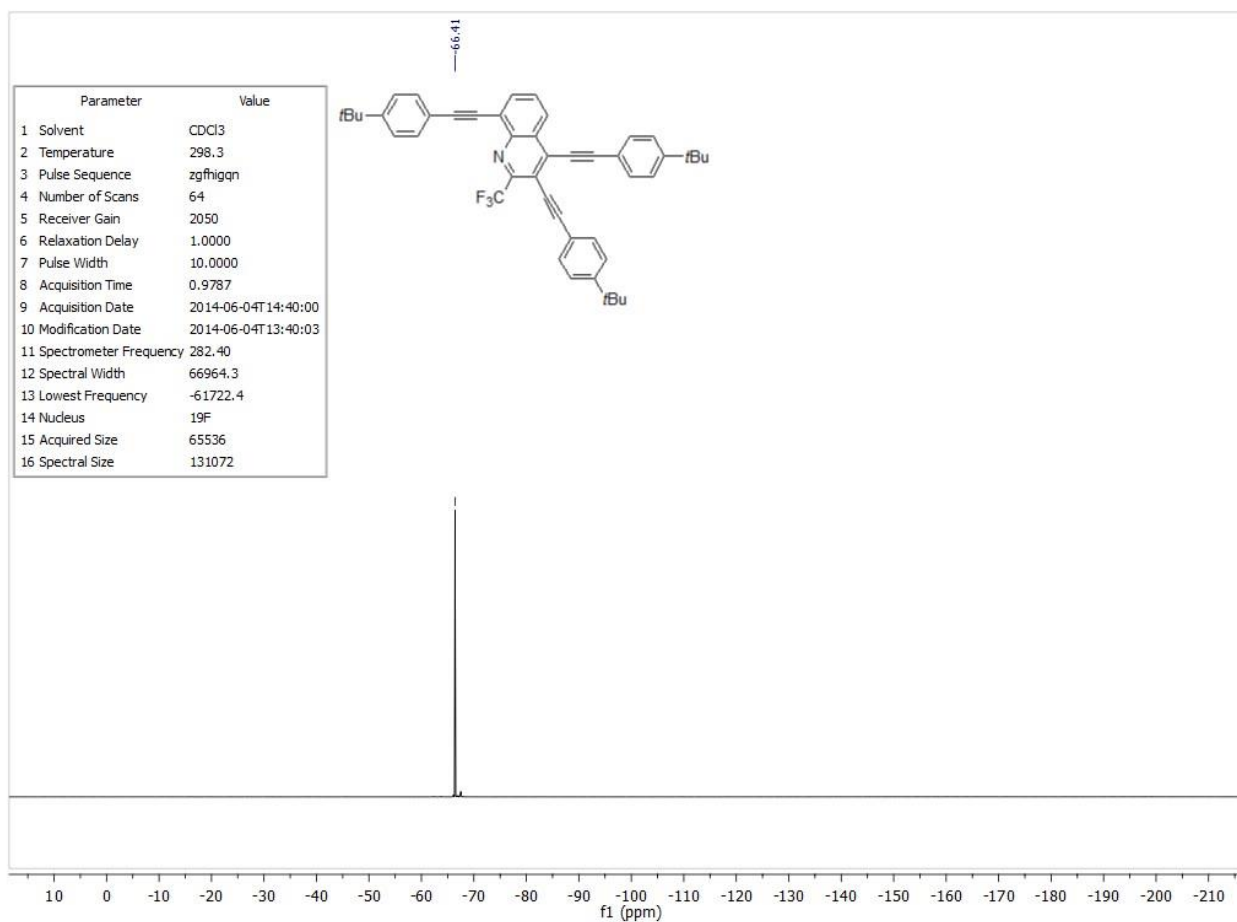

# 12d - 3,4,8-Tris(4'-fluorophenylethynyl)-2-trifluoromethylquinoline

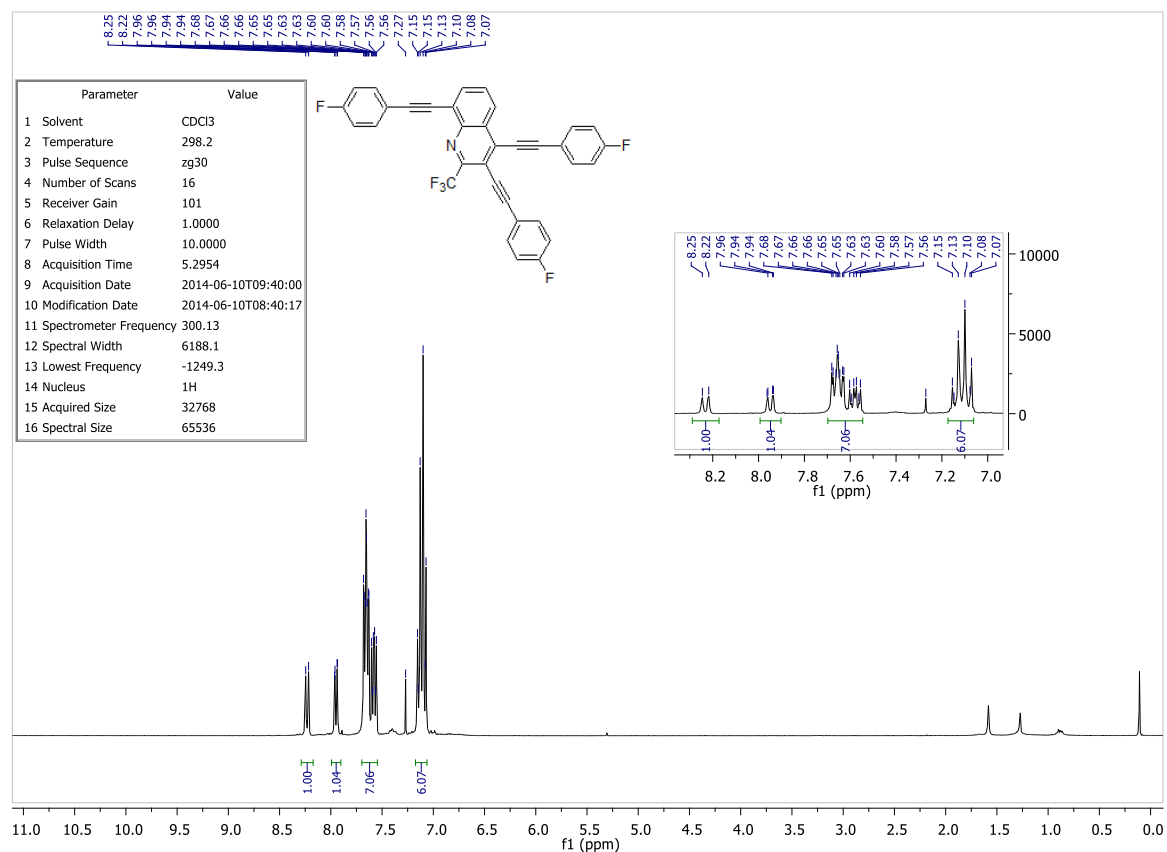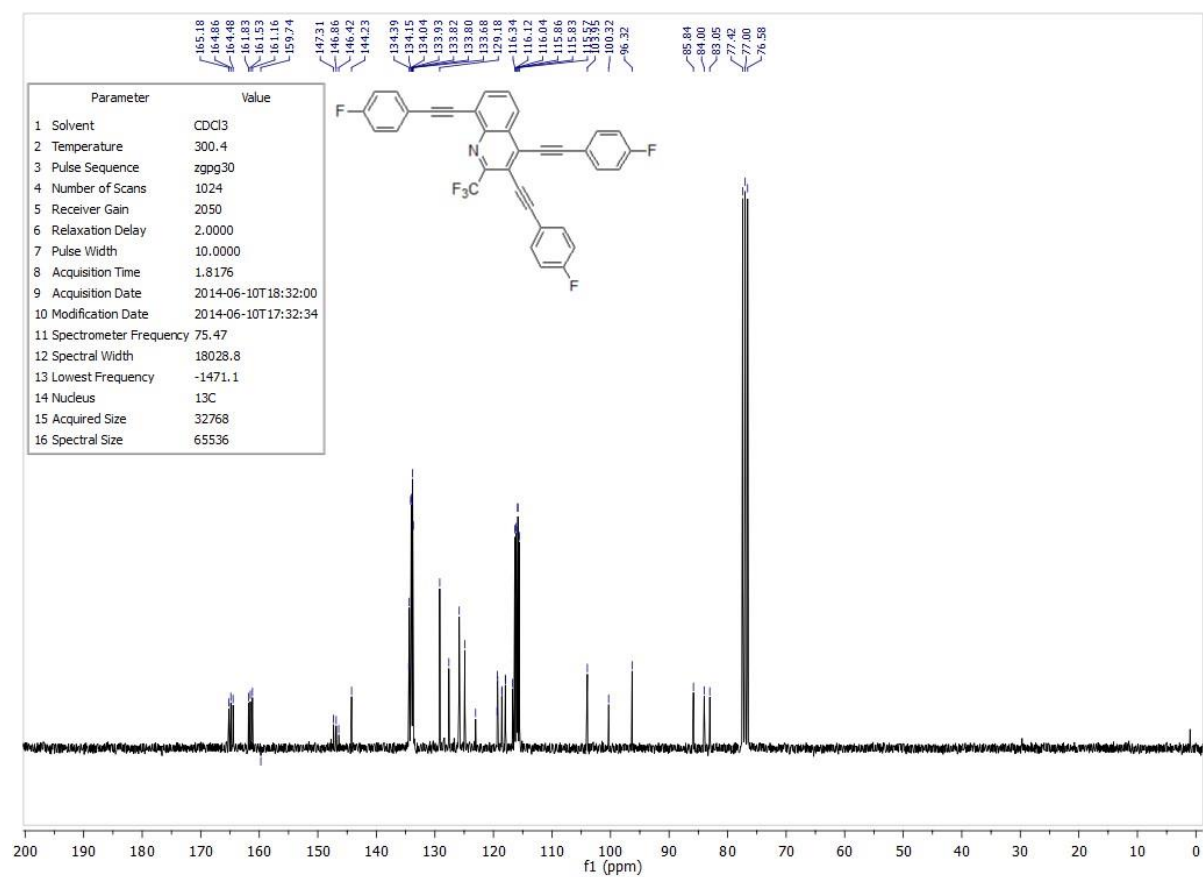

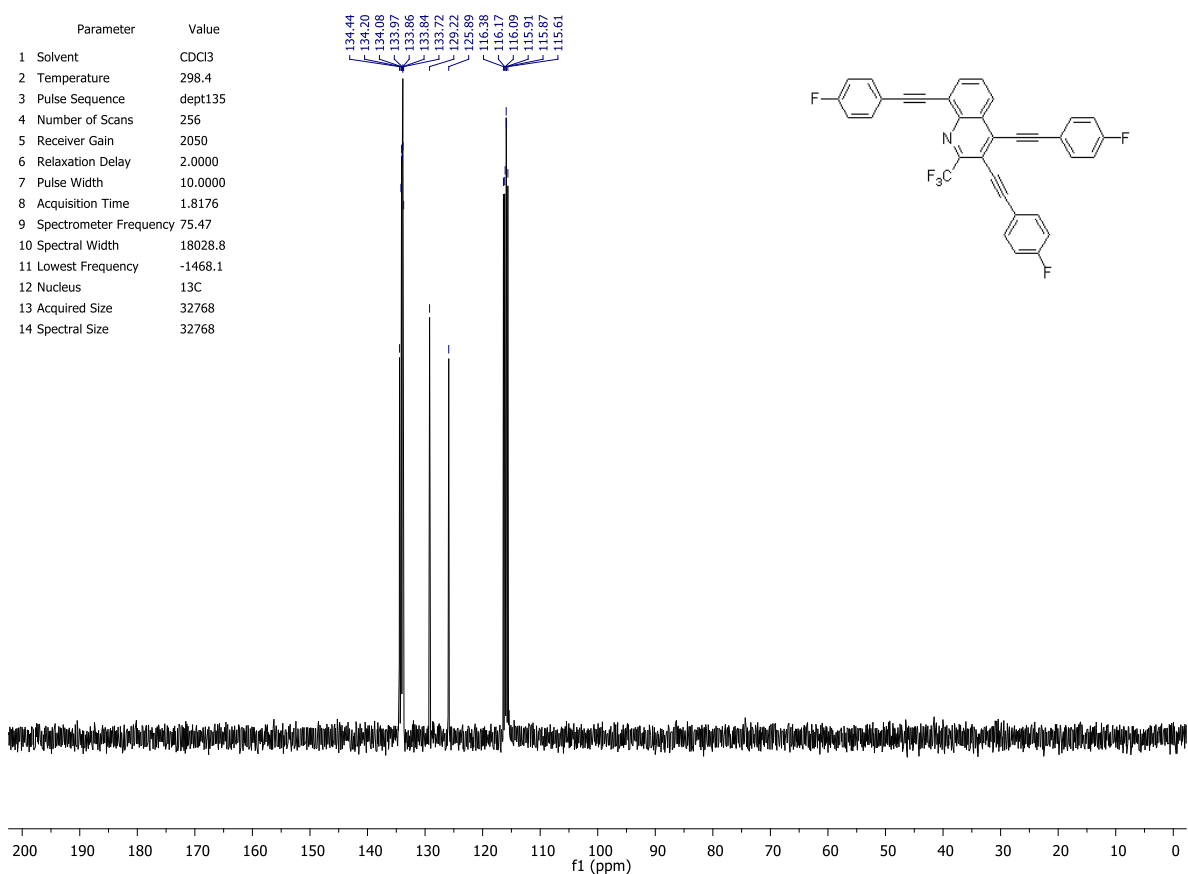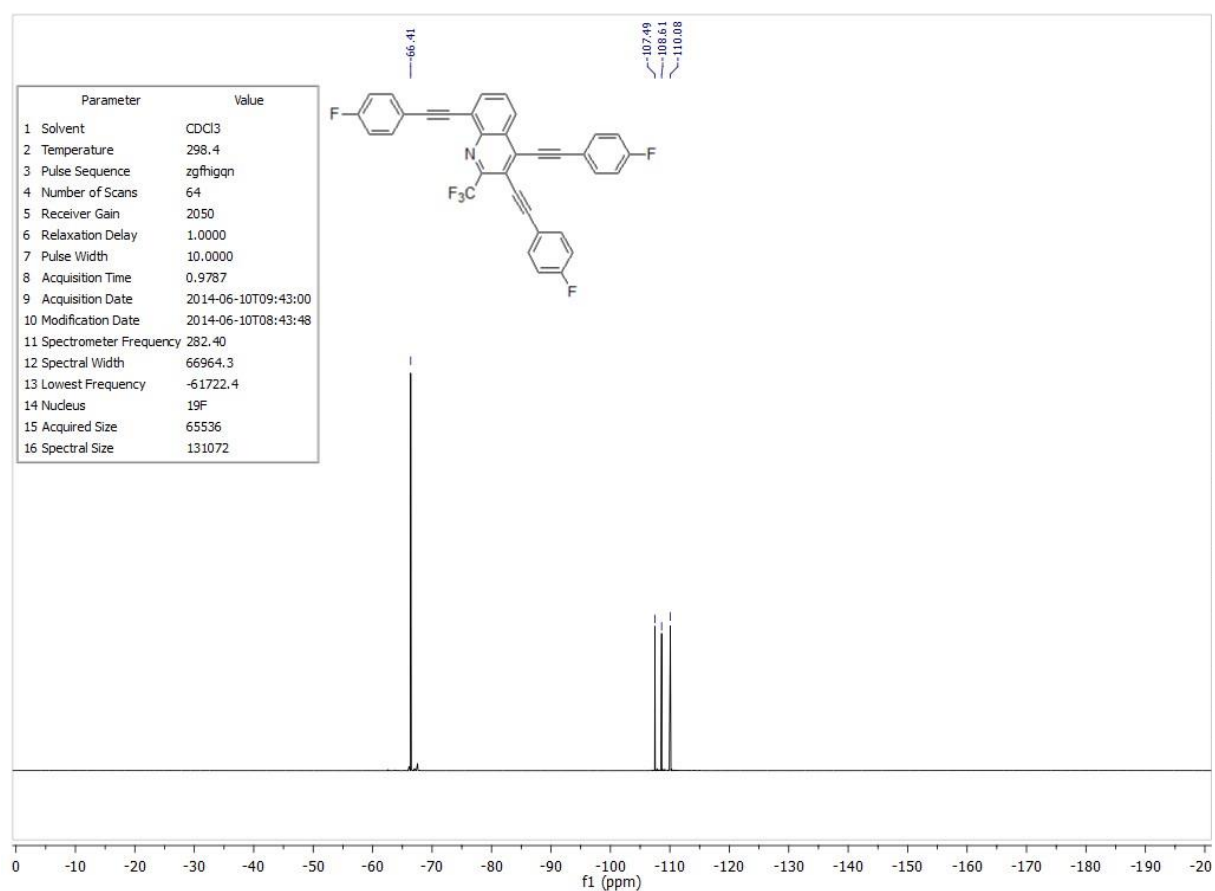

# 12e - 3,4,8-Tris(4'-methoxyphenylethynyl)-2-trifluoromethylquinoline

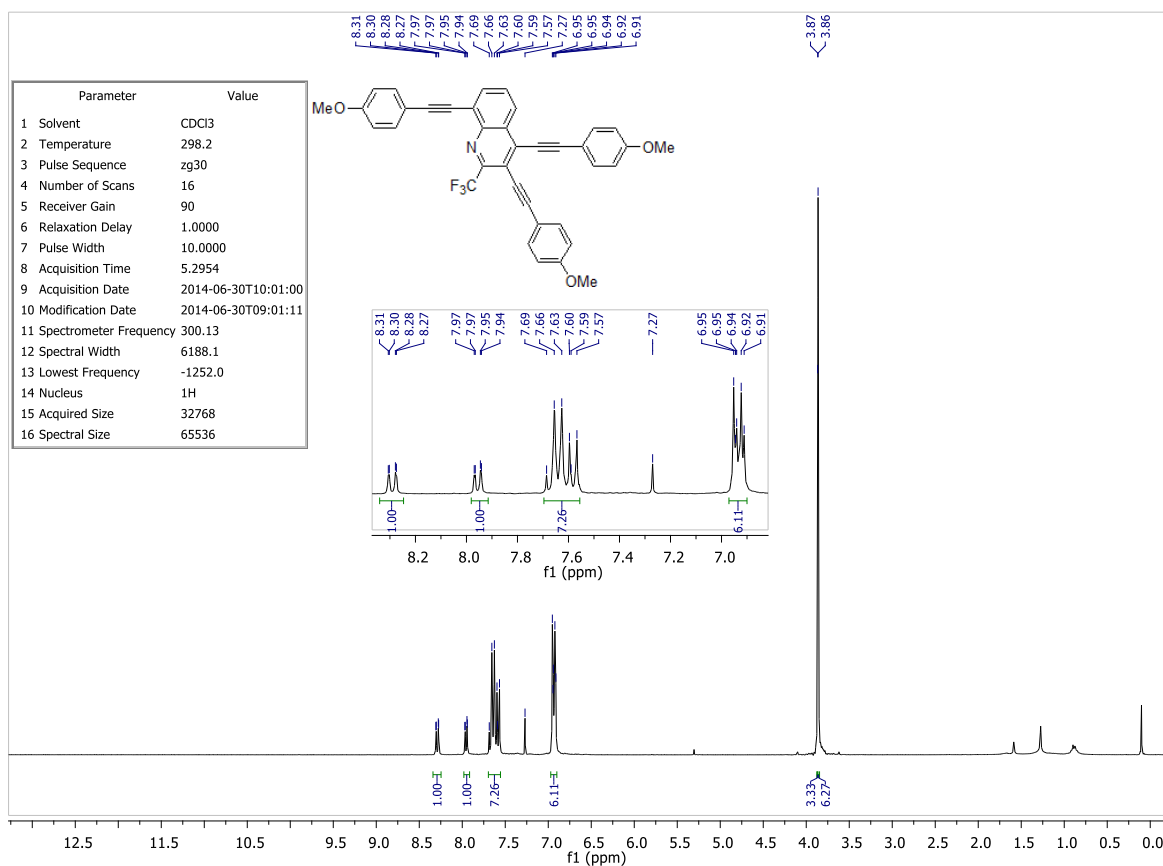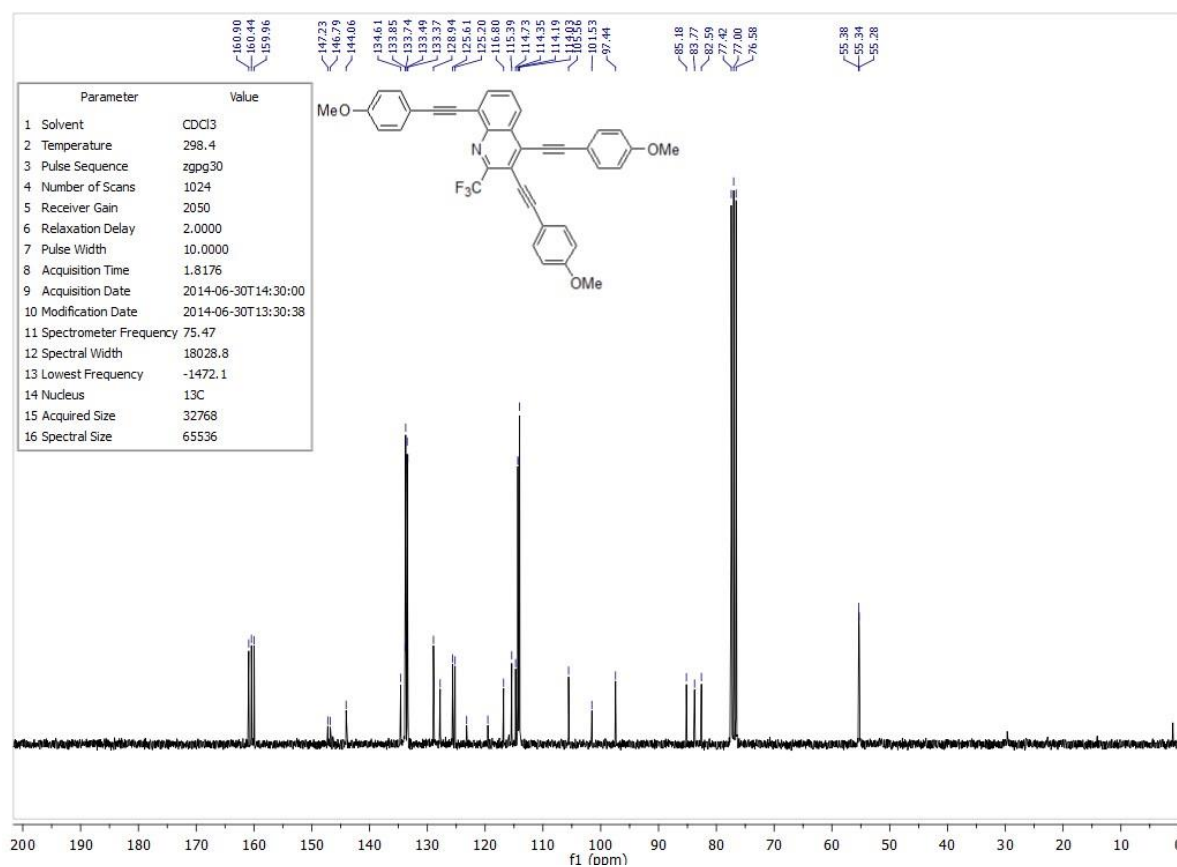

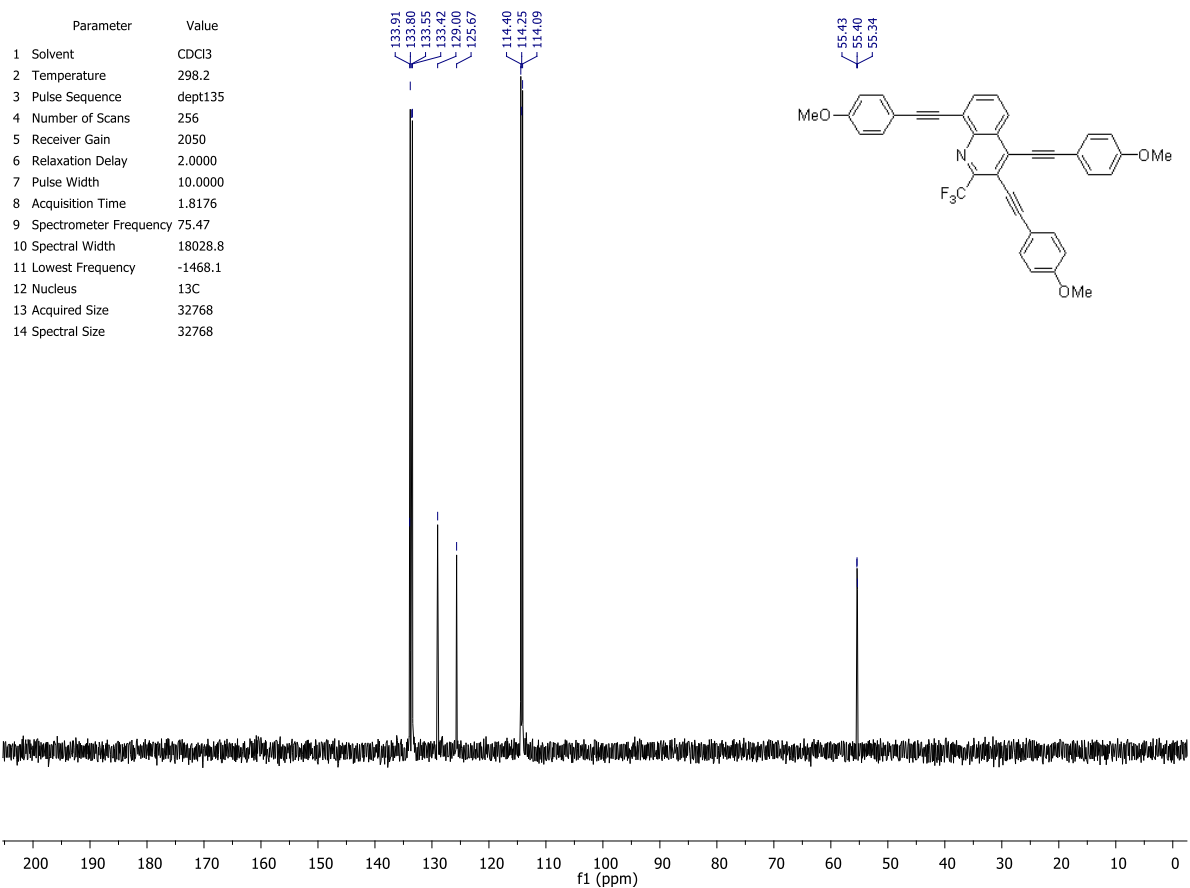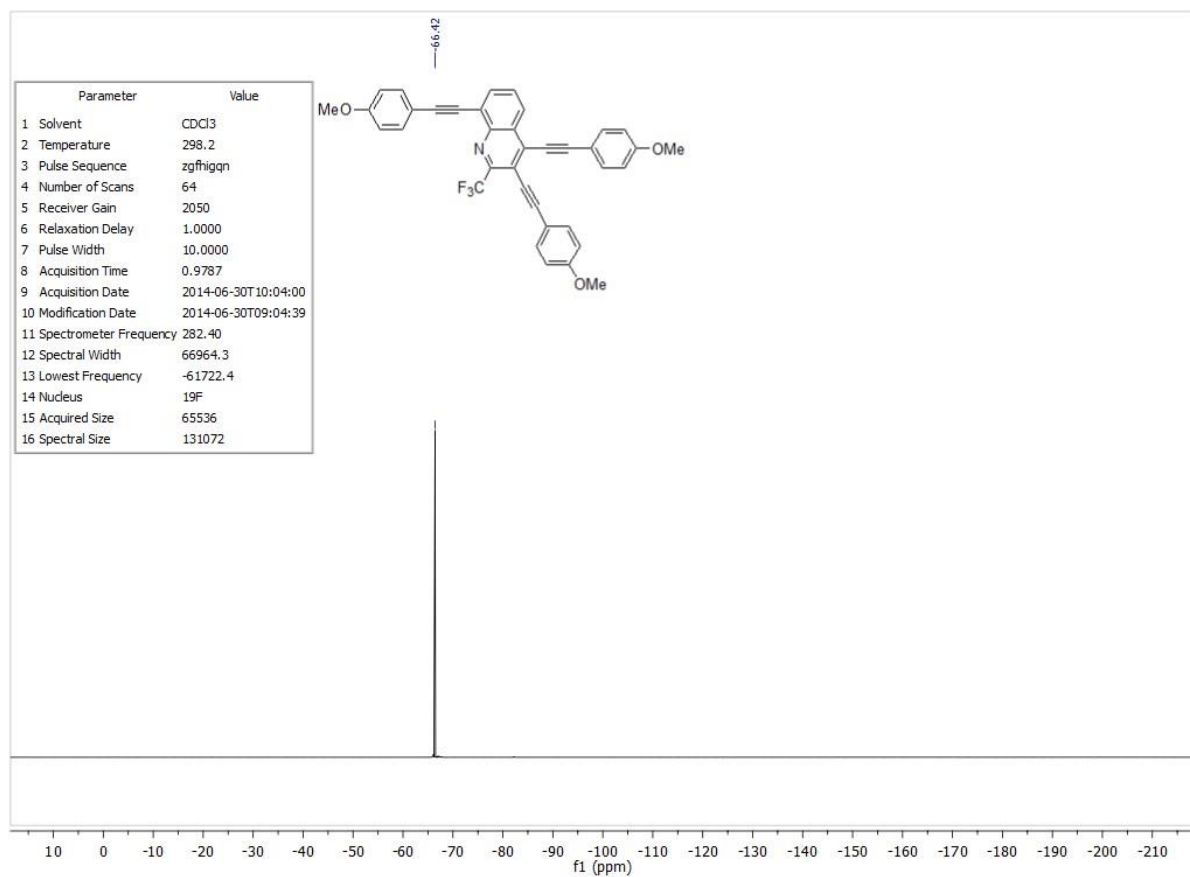

# 12f - 3,4,8-Tris(3'-thienylethynyl)-2-trifluoromethylquinoline

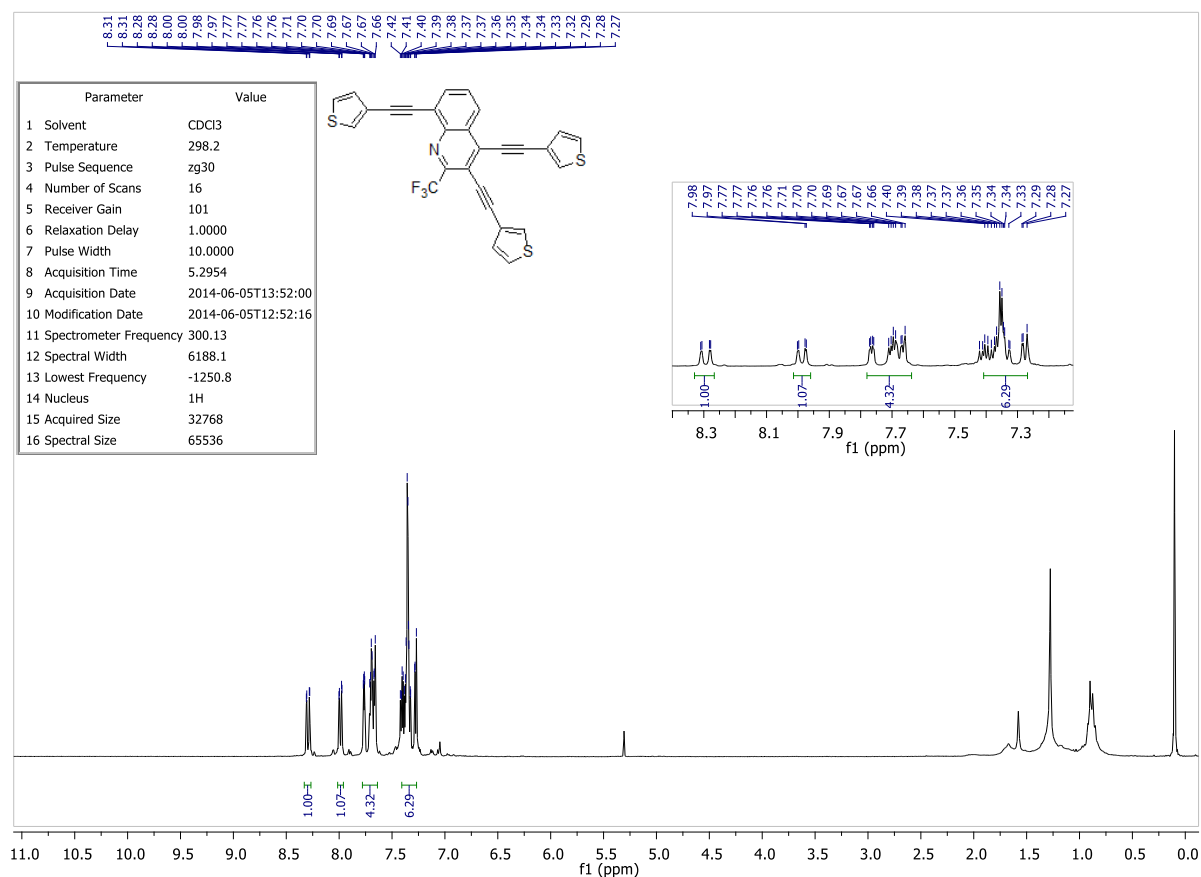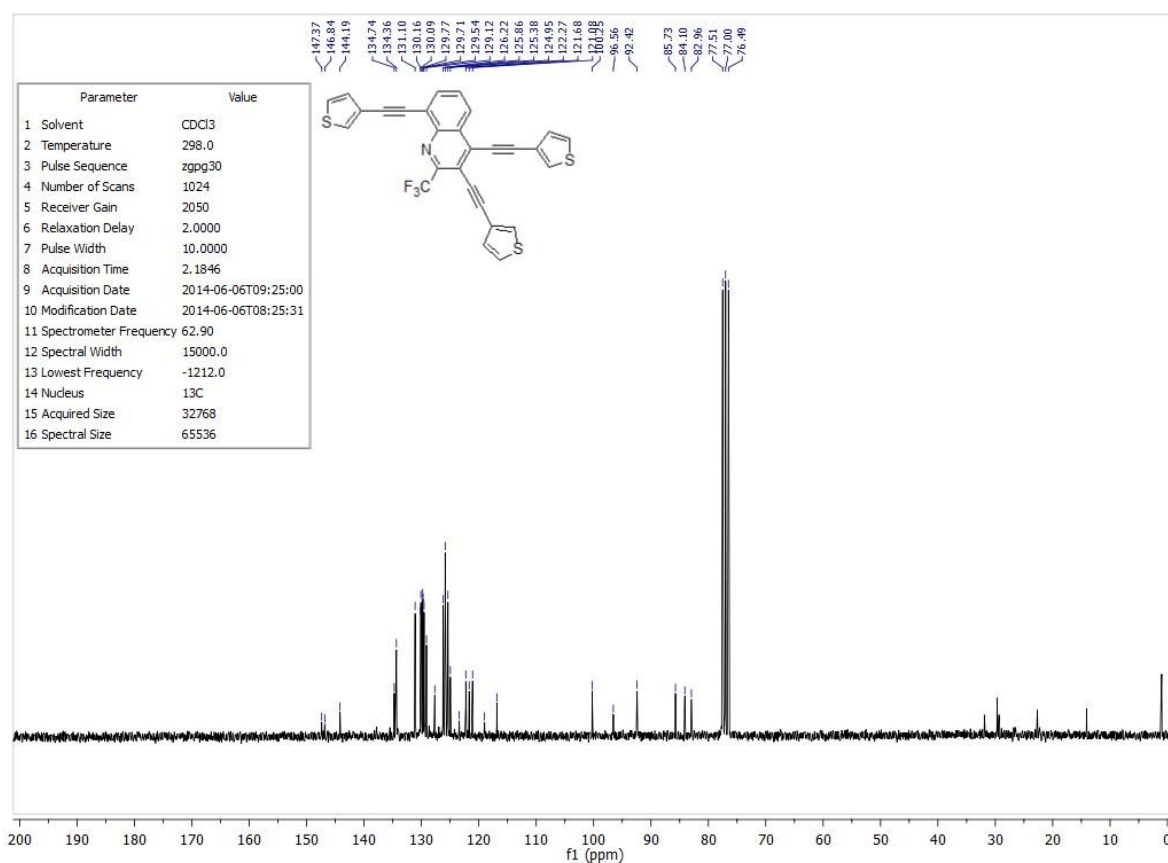

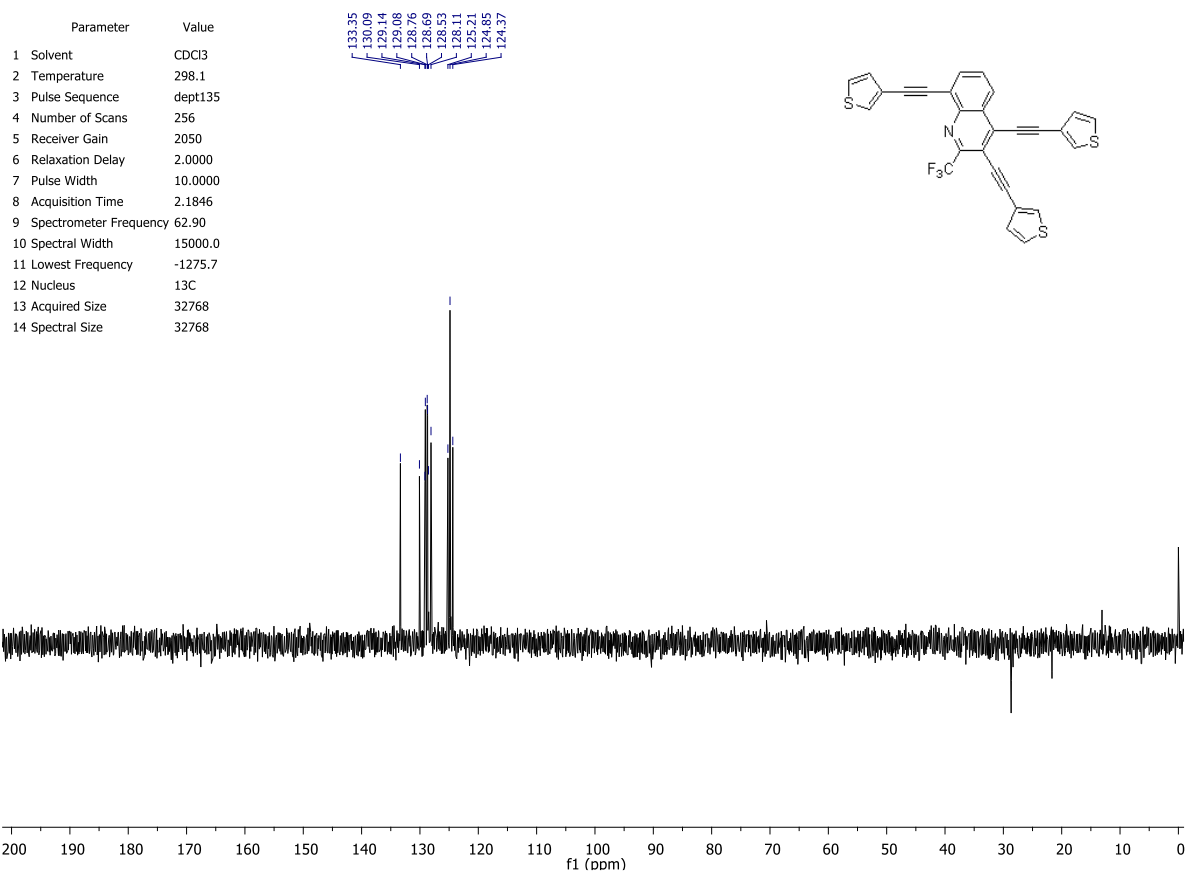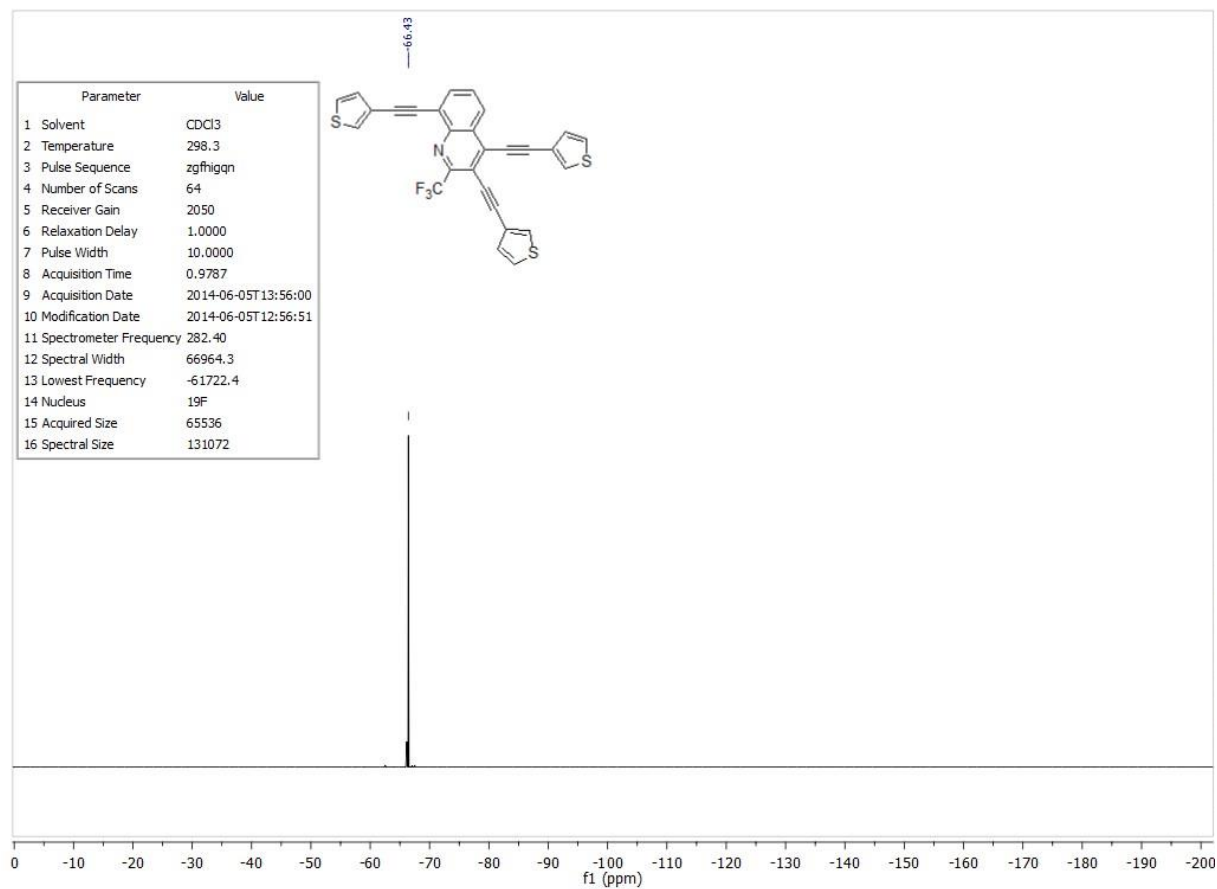



# 12g - 3,4,8-Tris(cyclopropylethynyl)-2-trifluoromethylquinoline

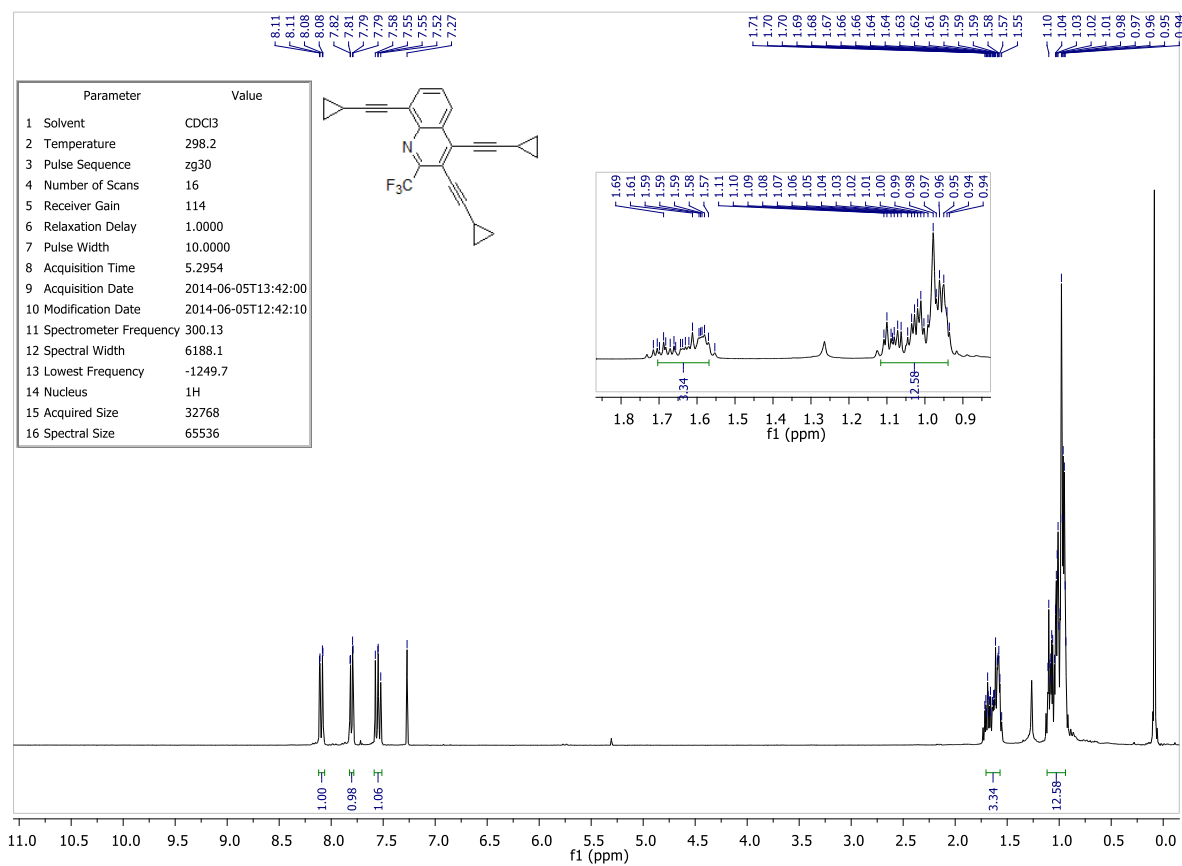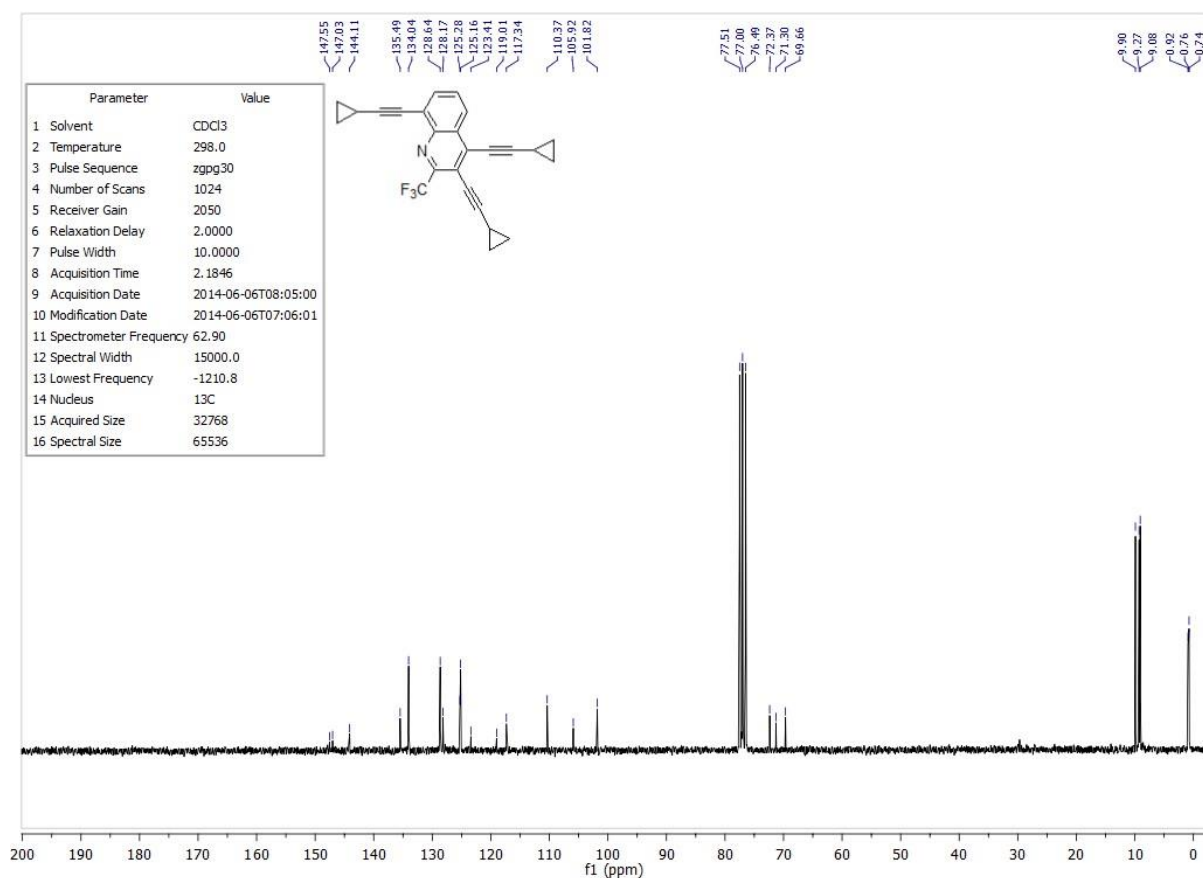

| Parameter                | Value             |
|--------------------------|-------------------|
| 1 Solvent                | CDCl <sub>3</sub> |
| 2 Temperature            | 298.1             |
| 3 Pulse Sequence         | dept135           |
| 4 Number of Scans        | 512               |
| 5 Receiver Gain          | 2050              |
| 6 Relaxation Delay       | 2.0000            |
| 7 Pulse Width            | 10.0000           |
| 8 Acquisition Time       | 2.1846            |
| 9 Spectrometer Frequency | 62.90             |
| 10 Spectral Width        | 15000.0           |
| 11 Lowest Frequency      | -1257.5           |
| 12 Nucleus               | <sup>13</sup> C   |
| 13 Acquired Size         | 32768             |
| 14 Spectral Size         | 32768             |

133.30  
127.90  
124.42

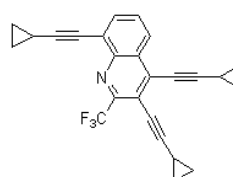

9.16  
8.53  
8.34  
0.26  
0.18  
-0.01

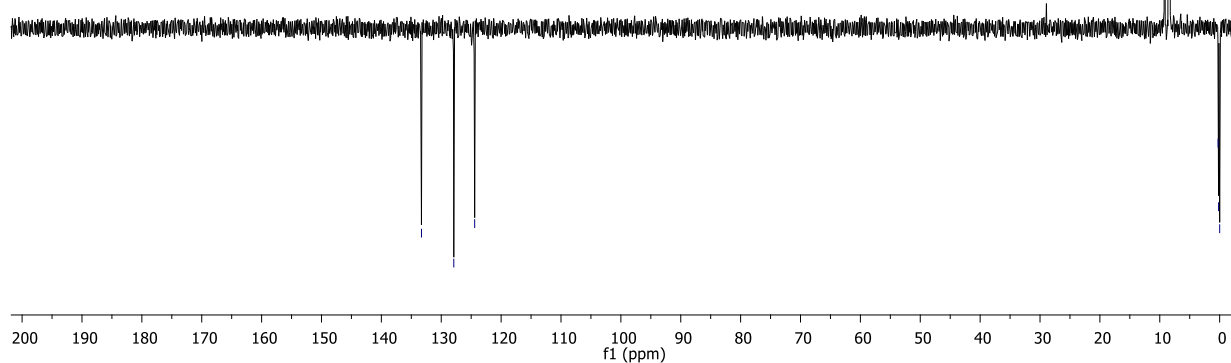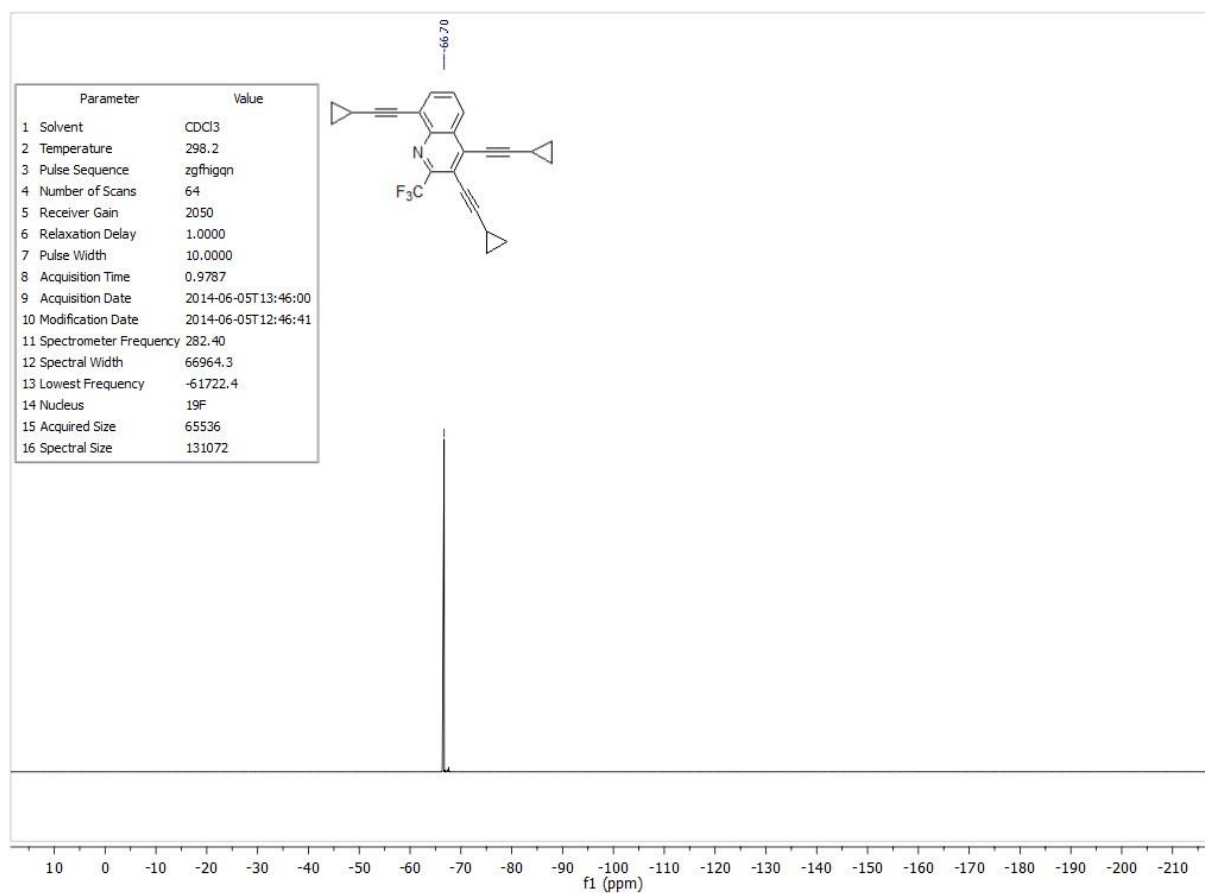

---

<sup>i</sup> Marull, M.; Schlosser, M. *European Journal of Organic Chemistry* **2003**, 2003 (8), 1576–1588. doi:10.1002/ejoc.200390217

<sup>ii</sup> Da Silva, E. T.; Andrade, G. F. de; Da Araújo, A. S.; Lourenço, M. C. S.; Souza, M. V. N. de. *European journal of pharmaceutical sciences : official journal of the European Federation for Pharmaceutical Sciences* **2021**, 157, 105596. doi:10.1016/j.ejps.2020.105596

<sup>iii</sup> Upadhayaya, R. S.; Dixit, S. S.; Földesi, A.; Chattopadhyaya, J. *Bioorganic & Medicinal Chemistry Letters* **2013**, 23 (9), 2750–2758. doi:10.1016/j.bmcl.2013.02.054
